# Supplementary material for: Identification and validation of immunogenic cell death-related score in uveal melanoma to improve prediction of prognosis and response to immunotherapy
Source: publisher site journal article supplement (doi:10.18632/aging.204680), 2023-05-03
Supplement: Supplementary file [file aging-v15i9-204680-supplementary-material-SD1.pdf]

**SUPPLEMENTARY FIGURE**

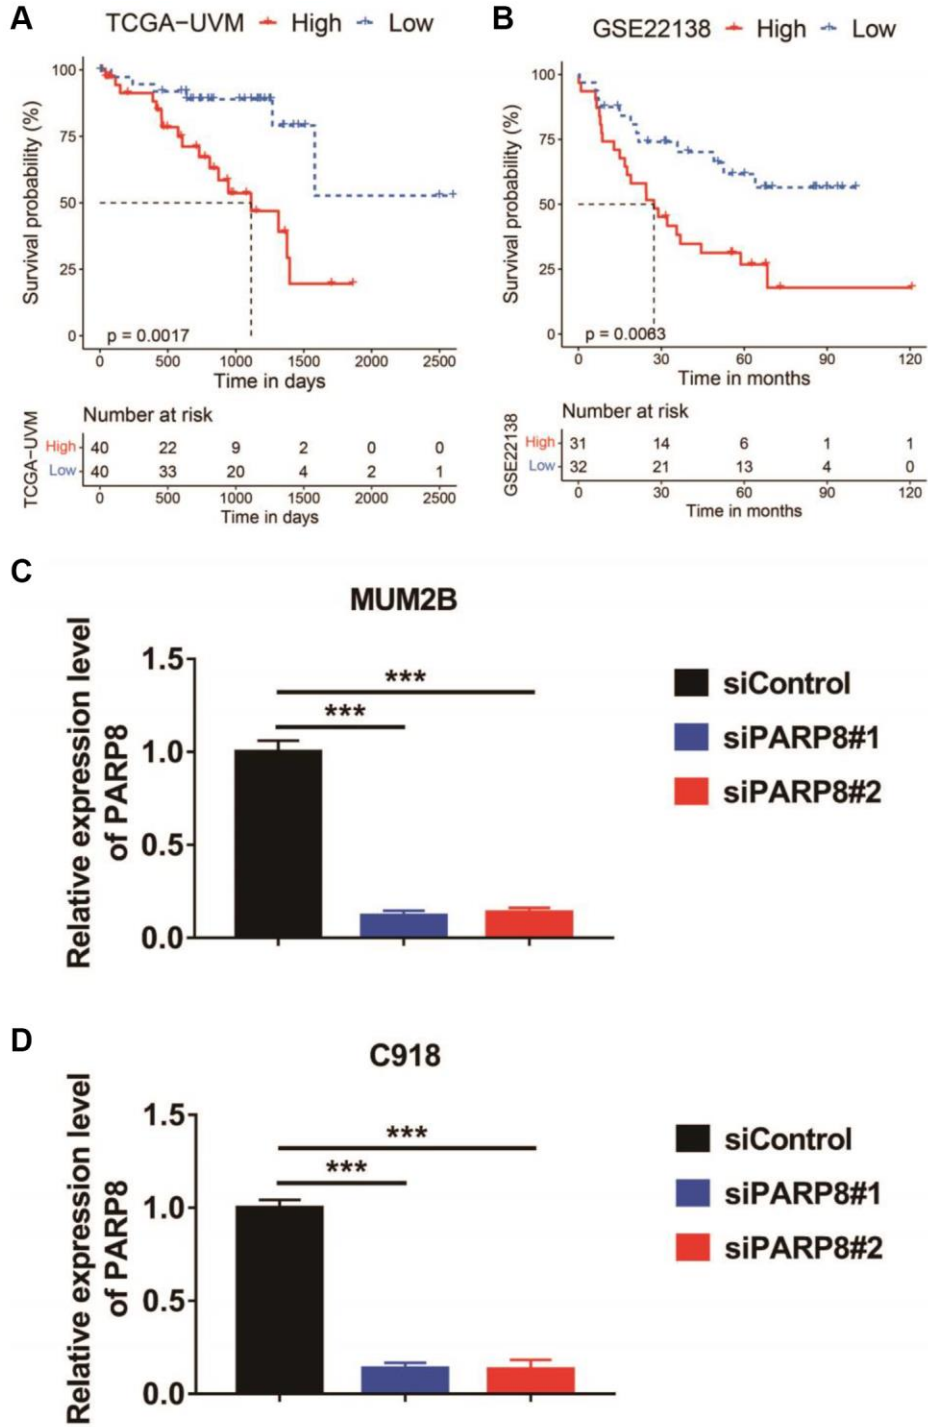

**Supplementary Figure 1.** (A, B) Kaplan–Meier curves of OS in the PRKCDBP-high and PRKCDBP-low subgroups of UVM patients from the TCGA-UVM (A) and GSE22138 (B) cohorts. (C, D) qPCR result of PARP8 in MUM2B (C) and C918 (D) cells transfected with siPARP8 or negative control.
