# Supplementary material for: Identification and validation of immunogenic cell death-related score in uveal melanoma to improve prediction of prognosis and response to immunotherapy
Source: publisher site journal article supplement (doi:10.18632/aging.204680), 2023-05-03
Supplement: Supplementary file [file aging-v15i9-204680-supplementary-material-SD2.pdf]

## SUPPLEMENTARY TABLE

Supplementary Table 1. The sequences of siRNA and qPCR primer.

| Application      |       | Forward sequence            | Reverse sequence            |
|------------------|-------|-----------------------------|-----------------------------|
| PARP8#1          | qPCR  | 5'-TACGGAGGGCAGGTGAACTA-3'  | 5'-TTCCCAAGCCACAGCAATCT-3'  |
| PARP8#2          | qPCR  | 5'-TACGGAGGGCAGGTGAACTA-3'  | 5'-TTCCCAAGCCACAGCAATCT-3'  |
| CD274#1          | qPCR  | 5'-CTGGCATTGCTGAACGCAT-3'   | 5'-AGGTCTTCCTCTCCATGCAC-3'  |
| CD274#2          | qPCR  | 5'-CTGGCATTGCTGAACGCAT-3'   | 5'-AGGTCTTCCTCTCCATGCAC-3'  |
| GAPDH            | qPCR  | 5'-TCGGAGTCAACGGATTTGGT-3'  | 5'-TCGCCCCACTTGATTTTGGGA-3' |
| PARP8#1          | siRNA | 5'-GGUGGUAGAUCUACUAGUAUC-3' | 5'-UACUAGUAGAUCUACCACCUG-3' |
| PARP8#2          | siRNA | 5'-CGACUACACUGUUCACUUACA-3' | 5'-UAAGUGAACAGUGUAGUCGAA-3' |
| Negative control | siRNA | 5'-UUCUCCGAACGUGUCACGUTT-3' | 5'-ACGUGACACGUUCGGAGAATT-3' |
