# Supplementary material for: Identification and validation of immunogenic cell death-related score in uveal melanoma to improve prediction of prognosis and response to immunotherapy
Source: Aging (Albany NY). 2023 May 3;15(9):3442–64. doi: 10.18632/aging.204680 (PMC10449274; doi:10.18632/aging.204680)
Supplement: Supplementary Table 2-5 [file aging-15-204680-s003.xlsx]

## Sheet: Supplementary Table 2
Supplementary Table 2. Differentially expressed genes between C1 and C2 subgroups in the TCGA-UVM dataset.
DEGs	logFC	adj.P.Val
APOL1	-4.78344	5.04949e-18
HTR2B	-4.77931	1.47267e-05
IGKC	-4.5642	1.56316e-05
GBP1	-4.55235	1.79515e-21
CYSLTR2	-4.4919	5.93562e-10
IFI27	-4.38056	1.84227e-10
IGHM	-4.31745	1.10343e-06
IGHG1	-4.30902	5.07435e-05
CXCL9	-4.27248	1.39313e-19
NKG7	-4.24994	2.61073e-16
HCP5	-4.23705	5.68845e-10
TRBC2	-4.20132	1.05006e-17
CD3D	-4.19038	1.26972e-20
PSMB9	-4.18614	4.26439e-15
IGLC3	-4.13728	1.99833e-06
GBP2	-4.13162	1.05661e-18
CCL5	-4.1238	4.2958e-14
IGHA1	-4.09221	0.000114737
FCGR3A	-4.05199	4.18903e-15
CD8A	-4.05052	4.171e-22
RARRES3	-4.04552	1.18674e-13
CD2	-4.01851	8.7153e-20
LAG3	-4.01584	2.67919e-19
IGHG3	-3.89602	7.56809e-05
CXCL10	-3.87128	3.0367e-16
TRAC	-3.85606	3.72486e-14
GZMK	-3.83263	2.71968e-23
IGLC2	-3.81808	2.44968e-05
GZMA	-3.812	7.82804e-18
CST7	-3.80186	8.27348e-16
CD3E	-3.78534	8.17812e-19
HLA-DRA	-3.77284	1.01953e-11
IGHG2	-3.76106	1.00413e-05
HLA-DRB5	-3.7537	1.02542e-10
BST2	-3.73069	8.7866e-11
CD27	-3.70567	1.79515e-21
HLA-B	-3.64917	1.06839e-10
APOL3	-3.63901	7.53881e-23
TAP1	-3.62855	1.76882e-14
IRF1	-3.612	3.47858e-18
UBD	-3.58957	5.69679e-20
LYZ	-3.52513	2.06078e-07
IGLV1-40	-3.51314	0.000212546
HLA-F	-3.51305	2.02176e-13
HLA-DRB1	-3.51296	4.97902e-12
IGJ	-3.50649	7.58199e-06
WARS	-3.5018	1.85461e-11
IGHV3-23	-3.46965	9.77376e-05
IGHV3-33	-3.46703	6.51674e-05
COL22A1	-3.45615	3.12414e-18
FAM26F	-3.45302	3.31024e-18
IL2RG	-3.44188	2.59542e-16
CD74	-3.43922	2.94109e-13
GBP4	-3.42961	5.31055e-20
TRBV28	-3.4284	1.31112e-19
OR2I1P	-3.41772	1.03716e-20
HLA-DQB1	-3.41698	6.07016e-11
IGLV3-1	-3.35336	8.95192e-07
IGKV4-1	-3.33038	0.000377328
APOL6	-3.32887	3.98359e-16
STAT1	-3.31296	6.94119e-13
IGKV3-20	-3.31243	0.000565507
CXCR3	-3.31236	7.58745e-20
ETV7	-3.30605	1.37224e-14
PRF1	-3.3053	1.51044e-20
HLA-DQA1	-3.29333	1.21082e-10
IGKV1-5	-3.26119	0.000162924
IGLV2-14	-3.24375	4.65534e-05
HLA-DPA1	-3.24363	3.53896e-12
CHAC1	-3.23262	0.000123341
HLA-DQB2	-3.20469	5.79596e-10
IGLV3-25	-3.18605	1.99833e-06
LCP1	-3.16856	1.22601e-14
HLA-DQA2	-3.15946	4.37962e-06
CD52	-3.15245	6.15223e-12
BANCR	-3.14696	4.62861e-05
C1QB	-3.13761	1.36938e-09
S100A4	-3.13232	1.10318e-06
HLA-DOA	-3.11102	1.10344e-14
CTSW	-3.10798	1.98487e-17
CCL4	-3.09281	6.3774e-22
CD8B	-3.09211	1.05538e-23
VGF	-3.07607	0.000271229
IL18BP	-3.05952	4.59705e-15
SECTM1	-3.05609	1.22601e-14
IL32	-3.05389	8.47275e-15
GBP1P1	-3.04686	2.12217e-24
ITGAL	-3.03695	7.83241e-19
IDO1	-3.03401	1.03716e-20
B2M	-3.03002	6.43513e-10
C1S	-3.02075	6.67186e-09
IGKV3-11	-3.01308	2.13103e-05
CORO1A	-3.00023	6.6085e-16
PSMB8-AS1	-2.99713	5.9228e-10
ECM1	-2.99349	3.28781e-05
CXCR2P1	-2.99343	6.24708e-21
LCK	-2.99267	2.71984e-22
SIT1	-2.99064	1.42535e-23
C1QC	-2.97532	5.91566e-10
TRBV20-1	-2.95248	1.29001e-20
SIRPG	-2.94006	3.94163e-26
PTGER4	-2.93034	0.000586245
IGLV2-23	-2.92681	4.25897e-05
PDCD1	-2.92611	3.94163e-26
GBP5	-2.91585	2.24045e-25
LAPTM5	-2.90097	6.00923e-11
CD53	-2.89154	1.16717e-12
C1QA	-2.88971	6.99581e-10
IGHGP	-2.86453	1.63177e-05
C1R	-2.85904	1.54858e-08
HLA-C	-2.84004	5.69514e-11
BATF	-2.82949	1.04567e-18
IL2RB	-2.82145	5.87377e-21
FGL2	-2.81367	3.92785e-10
UBE2L6	-2.80912	8.3489e-08
CTSS	-2.80063	1.85157e-08
SASH3	-2.78557	1.46851e-15
CD48	-2.78399	1.30524e-08
LTB	-2.77765	8.96344e-14
BTN3A1	-2.77661	3.0826e-12
IFITM1	-2.76901	1.9452e-05
HLA-DPB1	-2.75834	5.32737e-12
CD7	-2.75739	2.11852e-21
NLRC5	-2.757	1.15489e-15
IGKV3-15	-2.75547	6.48295e-06
HLA-DRB6	-2.74826	7.05069e-06
SLAMF8	-2.72976	6.91928e-14
IGHV4-39	-2.6999	0.00340227
CCR5	-2.68811	1.29001e-20
PSMB8	-2.68283	5.07287e-10
BTN3A3	-2.67131	9.53231e-13
TYMP	-2.67095	5.41714e-11
EEF1A2	-2.66597	0.00554031
PLEK	-2.66501	7.08359e-16
HLA-E	-2.66079	3.14148e-15
SLAMF7	-2.65623	3.10659e-08
IGHA2	-2.64308	0.00030645
GIMAP7	-2.63943	2.79575e-12
LGALS3	-2.63423	3.22588e-06
HLA-DMB	-2.63387	7.36803e-12
PTPRC	-2.63246	4.16006e-18
IGLV1-44	-2.62617	9.08646e-05
IGHV1-69-2	-2.62614	5.56901e-05
IGHV3-30	-2.60606	0.000176669
HSPB8	-2.60595	0.000517244
GZMH	-2.60387	2.04939e-14
IGKV1-16	-2.59609	2.67838e-05
CLIC2	-2.59385	2.78523e-11
IL12RB1	-2.58509	4.73932e-21
IGHG4	-2.58503	4.67263e-05
PTPN6	-2.57526	1.25102e-14
CXCL13	-2.57504	8.74554e-15
MS4A7	-2.57451	1.52508e-13
GIMAP4	-2.57189	3.45343e-14
AIF1	-2.55509	1.11411e-11
TRIM22	-2.55257	9.57241e-08
IGHV1-69	-2.5487	4.28069e-05
IGKV1-6	-2.5431	4.80734e-06
IGHV4-34	-2.53994	0.000187921
TRAV12-2	-2.53904	2.83626e-13
EVI2B	-2.53195	1.25086e-13
TRBV9	-2.5281	5.53691e-19
GBP3	-2.52084	1.15149e-14
IGLV1-51	-2.5122	0.00064551
LY96	-2.50968	0.0020607
IGHV3-21	-2.50908	0.000127807
TRPV2	-2.50815	0.00115845
AC110781.3	-2.50294	0.000391855
HCG4P5	-2.49633	0.0115622
TNFRSF1B	-2.49301	1.2545e-11
RP11-638I2.9	-2.48983	1.27628e-11
CCL19	-2.48404	1.26999e-05
HLA-DMA	-2.47703	3.32395e-13
HCLS1	-2.45904	7.36256e-12
UCP2	-2.4578	3.0269e-10
MS4A6A	-2.45741	5.44862e-12
RGS1	-2.45456	4.42639e-05
IL10RA	-2.44137	9.43864e-16
EOMES	-2.4247	2.34572e-13
RP11-4B16.3	-2.41682	0.000119623
PTPN7	-2.41282	1.96626e-23
RAC2	-2.41034	1.57459e-07
ABI3	-2.40893	6.64971e-13
ISM1	-2.39323	3.55385e-05
IRF8	-2.38377	3.89247e-16
HLA-H	-2.38282	6.42745e-07
SLAMF6	-2.38028	6.3774e-22
TMSB4X	-2.37584	1.97443e-09
CD209	-2.36805	2.78665e-08
TRBV7-9	-2.36577	2.01644e-11
ISG15	-2.36494	0.000121982
TRBJ2-3	-2.36445	2.34022e-13
TRIM69	-2.35971	4.45218e-13
CD70	-2.35941	3.96324e-08
WAS	-2.35899	1.07631e-14
IGLV2-11	-2.35715	0.000500902
GEM	-2.3561	4.31577e-05
LCP2	-2.35542	1.31352e-18
SEL1L3	-2.35429	6.68287e-07
DOK2	-2.35013	1.59998e-13
FCER1G	-2.34424	1.10655e-09
IGHV5-51	-2.33998	0.000336072
CYBB	-2.33516	4.13805e-10
CD5L	-2.33031	2.3356e-10
TYROBP	-2.32472	6.11157e-08
MPEG1	-2.3242	6.33236e-09
CMB9-22P13.1	-2.31638	1.18217e-05
ISG20	-2.31283	7.4258e-09
MMP9	-2.31189	9.08524e-05
CCL3	-2.30529	3.94575e-12
IGHV1-18	-2.30036	0.000247953
USP30-AS1	-2.29951	5.52994e-22
IGKV1-17	-2.29204	0.000594012
GMFG	-2.29064	7.37814e-14
SELPLG	-2.2888	1.33407e-11
RNASE6	-2.28711	2.06507e-08
GZMB	-2.28179	1.27325e-14
TNFAIP2	-2.27812	2.48671e-10
EPSTI1	-2.27809	5.17624e-15
CASP1	-2.27219	3.30584e-10
RASAL3	-2.26623	2.15414e-19
SIGLEC10	-2.26391	8.35357e-15
TAP2	-2.25759	1.44043e-13
ARHGAP30	-2.25728	4.33807e-15
PCED1B	-2.253	2.93541e-19
SPN	-2.23722	5.70214e-22
ADAM23	-2.23696	0.00320401
EBI3	-2.23677	1.21552e-14
IGSF6	-2.23565	4.1723e-11
IGLV3-19	-2.23364	0.00181099
IKZF3	-2.22862	9.64797e-22
SLC16A6	-2.2251	0.00012068
LST1	-2.21598	1.88528e-12
VSIG4	-2.21278	1.63346e-08
HCST	-2.21123	1.33689e-11
IGLV6-57	-2.21092	0.00119595
IGHV4-59	-2.20855	0.00273448
IGKV1-9	-2.20516	3.99022e-05
SDC2	-2.20352	2.8734e-05
TBC1D10C	-2.20127	1.31352e-18
CELF2	-2.19838	0.000125523
CD247	-2.19142	1.05538e-23
LAP3	-2.1856	1.01817e-06
SH2D1A	-2.18133	2.42818e-22
LSP1	-2.17952	2.57543e-08
BTN3A2	-2.17884	3.71771e-10
HCK	-2.17693	1.10726e-12
HLA-A	-2.17618	2.71187e-08
FPR3	-2.17371	5.80134e-10
CD163	-2.17211	5.63838e-09
TNFAIP8L2	-2.16915	1.12988e-13
ADCY1	-2.16794	2.60693e-05
ADAMDEC1	-2.16703	7.03491e-08
IGHV3-13	-2.16198	3.50999e-05
IGHV1-2	-2.16103	0.000189018
TNFRSF19	-2.15779	0.00234112
CXCR6	-2.15711	1.9961e-23
HTATIP2	-2.15626	2.45248e-05
TRBJ2-7	-2.15435	2.32564e-13
NCKAP1L	-2.15089	1.47022e-16
SLC15A3	-2.15014	2.99697e-07
ITGB2	-2.14794	1.1191e-10
CECR1	-2.14604	6.92788e-05
COL9A3	-2.14308	0.00460541
C4B	-2.14195	1.71577e-06
HAVCR2	-2.14061	6.32097e-15
TRBV19	-2.13889	2.11902e-19
ZAP70	-2.13759	1.05538e-23
MIR4655	-2.13366	0.000968188
FASLG	-2.1334	9.93878e-23
CCL4L1	-2.12743	1.58055e-11
ARHGAP9	-2.12695	6.78318e-19
TRBV4-2	-2.12425	5.6356e-13
TNFSF13B	-2.11561	1.81663e-18
CD5	-2.11535	2.45004e-17
UCHL1	-2.11472	0.00254425
RAB31	-2.11292	2.04298e-05
MZB1	-2.11263	2.41287e-06
AC079796.1	-2.10962	0.000351432
SLA2	-2.10951	1.32589e-23
TAPBPL	-2.10225	4.20523e-12
RP11-1094M14.8	-2.10026	3.15053e-24
TRGC2	-2.09422	5.69679e-20
TNFRSF9	-2.09356	1.12178e-27
DLL4	-2.09325	2.55142e-05
TRAV19	-2.07408	3.15506e-15
TIGIT	-2.07363	1.65028e-25
MYEOV	-2.07282	0.00468944
NCF4	-2.07068	1.63968e-09
CD300A	-2.06663	8.61047e-13
CARD16	-2.06018	4.04612e-07
FCGR1A	-2.05848	1.858e-17
IGKV2-24	-2.05505	3.55402e-05
MS4A4A	-2.04991	3.62144e-10
RP5-1171I10.5	-2.04902	3.64579e-20
BIN2	-2.04734	9.79929e-18
APOL4	-2.047	8.35442e-21
MRC2	-2.0397	6.01273e-05
IGHV3-53	-2.03522	3.05886e-05
C4A	-2.03296	6.99621e-07
ARMC9	-2.03131	1.91983e-05
APBB1IP	-2.02623	3.69151e-15
RP11-612B6.2	-2.0222	0.000253515
PTGES3P1	-2.02147	1.03386e-10
CARD11	-2.02131	0.000385321
SPI1	-2.02025	1.61867e-09
HTRA1	-2.01975	0.00218511
GIMAP6	-2.01777	1.18852e-13
APOL2	-2.01293	1.44444e-15
PARP9	-2.01121	2.24239e-08
MAFB	-2.01072	5.59763e-09
CD86	-2.00498	3.45605e-14
SGK1	-2.00449	0.000770856
LINC00152	-2.00179	2.03123e-08
RRM2B	-1.99808	7.56371e-05
FYB	-1.99669	5.20201e-10
DOCK10	-1.99585	7.01206e-07
TRBV29-1	-1.9955	3.70973e-11
VAV1	-1.99283	1.54184e-15
IGHV2-5	-1.98687	0.00204401
SELL	-1.98611	1.34669e-10
RP11-848P1.3	-1.98222	4.04895e-14
ADAMTS2	-1.98081	0.000392343
SLA	-1.97917	1.80329e-18
HLA-DQB1-AS1	-1.97664	3.01842e-16
SQRDL	-1.97618	3.37862e-08
CD38	-1.97533	1.15947e-19
CIITA	-1.97206	4.171e-22
PARP14	-1.96936	3.71214e-08
SIGLEC8	-1.96835	8.36996e-09
XCL2	-1.96689	6.95576e-16
RASSF5	-1.96461	2.14924e-17
AOAH	-1.96286	5.02827e-11
HAPLN3	-1.96085	1.92714e-13
IFI6	-1.95271	0.00635166
VCAM1	-1.94711	1.17479e-13
HCG4P7	-1.94601	0.000478336
LGALS9	-1.93897	9.03684e-08
HLA-S	-1.93638	3.97171e-06
CYTH4	-1.9357	2.28899e-14
ITPR2	-1.93446	0.000266369
SAMSN1	-1.9338	1.13692e-15
FKBP11	-1.93305	1.83337e-06
XXbac-BPG248L24.12	-1.93106	3.81676e-06
CD3G	-1.93039	8.34425e-25
BATF2	-1.92866	3.9512e-10
SPON2	-1.92845	0.000791789
CLEC2B	-1.92825	3.50148e-06
TMSB4XP8	-1.9273	3.19666e-07
C2	-1.92672	0.000166176
CD14	-1.92558	2.5134e-08
SIGLEC1	-1.9223	5.00021e-10
DDX60	-1.91958	5.18316e-07
OAS2	-1.91938	0.000882944
IGLV1-47	-1.91718	0.0317371
GAS6-AS1	-1.91698	8.08991e-06
SPOCK2	-1.91669	9.48892e-07
ANXA1	-1.91574	0.000261875
RP11-48B3.4	-1.9123	0.000185003
NOV	-1.90295	2.21965e-05
IL4I1	-1.90132	1.72699e-09
ALDH1A1	-1.89899	0.000305976
IL18	-1.89061	2.46311e-15
TNFSF10	-1.88628	8.69457e-12
INPP5D	-1.88433	6.90233e-13
CCR1	-1.88061	2.31659e-10
CCL18	-1.87945	0.0112083
AC246787.4	-1.87844	1.62495e-13
CD163L1	-1.87767	4.03346e-09
HMOX1	-1.87593	9.16525e-07
PPM1K	-1.87409	0.00156447
CD4	-1.87309	2.02625e-07
MATK	-1.87103	0.00610309
FAS	-1.86841	3.42886e-05
IGLL5	-1.86735	0.0022382
NPTX1	-1.8672	3.37156e-07
CD37	-1.86375	9.53198e-09
IGHV3-11	-1.86021	0.000114634
FAM91A1	-1.86013	0.000271616
NT5E	-1.85944	0.00878758
SULF2	-1.85486	0.000229611
RUNX3	-1.85407	0.00182433
PARVG	-1.85314	8.03564e-18
IGLV3-21	-1.84971	0.00130112
PCED1B-AS1	-1.84889	1.80276e-18
ODF3B	-1.83893	3.38465e-09
PTP4A3	-1.83582	0.00167208
ME1	-1.83362	0.000136021
C3AR1	-1.83084	1.21657e-08
PSMB10	-1.82836	4.72453e-12
PSRC1	-1.82749	3.08327e-08
ARHGDIB	-1.82575	4.94724e-09
RIMS2	-1.82248	0.00112817
C1orf162	-1.82238	6.21156e-12
ARHGAP25	-1.82174	1.22267e-13
THEMIS2	-1.81996	1.10902e-07
SAMD9L	-1.81822	1.06706e-06
DTX3L	-1.81645	1.85419e-06
C16orf54	-1.81475	1.44191e-16
LAIR1	-1.81271	8.79416e-13
BTBD19	-1.81235	8.68141e-07
PHACTR1	-1.80994	0.0029445
AHNAK2	-1.8097	0.00620352
IGHV1-24	-1.8085	0.000575225
PLN	-1.80247	0.0305842
KIT	-1.80122	0.0179355
APOBEC3G	-1.80072	2.94745e-11
AC092580.4	-1.79968	2.37768e-11
APOBR	-1.79926	2.25189e-10
SCPEP1	-1.79654	4.64582e-06
TRPM2	-1.79435	4.65534e-05
FABP3	-1.79359	0.000246732
KIAA0196	-1.79358	0.00111028
LILRB5	-1.79341	1.98189e-11
LINC01531	-1.79298	0.0196606
ANKRD22	-1.79157	1.48653e-22
GCH1	-1.79131	9.46794e-13
SLCO2B1	-1.79065	9.71783e-09
TRBV6-5	-1.78503	1.09408e-15
LGALS17A	-1.78235	5.852e-18
RP11-404F10.2	-1.7806	0.000133389
CYTIP	-1.78059	8.62224e-17
NCF1C	-1.78053	2.32597e-09
FERMT3	-1.77983	0.00808976
IFI16	-1.77933	0.0124402
PIK3C2A	-1.77766	0.00239169
IL1R1	-1.77715	0.00176395
MAP4K1	-1.77656	4.82749e-09
TMEM51	-1.77591	5.74098e-07
IRF9	-1.77236	2.78797e-10
ITGAX	-1.77191	6.36327e-05
RP11-222K16.2	-1.7715	5.05454e-07
CSF1R	-1.77147	5.02246e-06
ACSL5	-1.77123	4.63097e-08
RCSD1	-1.77079	8.1875e-15
TOX	-1.77054	5.45904e-16
CD79A	-1.76741	0.000104303
SPHK1	-1.76495	1.98989e-05
PDCD1LG2	-1.7622	1.01913e-11
TRBJ2-2P	-1.76183	4.29181e-08
CXCL11	-1.7614	1.38011e-14
IGHV3-15	-1.76113	0.0087418
LY86	-1.75746	4.75094e-07
GZMM	-1.7569	7.58688e-10
IGHJ3	-1.7543	7.22088e-05
ADAP2	-1.75352	1.05101e-11
SLFN11	-1.75266	2.60751e-09
IGHV4-31	-1.75191	0.00124527
PSTPIP1	-1.7496	1.31435e-10
MIR155HG	-1.74956	1.26392e-13
IGHV4-4	-1.74623	0.000394879
CDKN1A	-1.74602	0.00151119
NAPSB	-1.74422	1.63973e-05
NKX2-4	-1.7436	0.000132425
LILRB2	-1.74283	2.98486e-16
PAEP	-1.74057	0.000556581
STK17B	-1.74011	5.6356e-13
AC246787.3	-1.738	2.95514e-13
AP1S3	-1.73776	3.78982e-07
CAPG	-1.7366	0.00314189
HLA-DOB	-1.73342	5.52662e-16
PARP8	-1.73271	1.56377e-06
GDF11	-1.73158	0.00119057
PLA2G2D	-1.72961	5.5948e-05
TRBV27	-1.72861	6.0816e-17
IGLV2-8	-1.7282	0.000415103
MYO1F	-1.72794	1.9717e-13
HLA-L	-1.72723	1.10507e-05
RP11-557H15.4	-1.72499	3.5172e-05
BCL3	-1.72491	4.53356e-08
PLA2G7	-1.7236	0.000397666
PYHIN1	-1.7216	1.80439e-10
LINC00963	-1.72026	3.97519e-06
CADM1	-1.72015	0.000576398
PIM2	-1.71997	1.75596e-10
FIBCD1	-1.71912	0.00177918
BAG2	-1.71802	2.65222e-05
RP11-203P23.2	-1.7135	1.64793e-05
FOLR2	-1.71223	1.86402e-05
CD6	-1.71209	2.64227e-13
NBN	-1.70668	0.000193618
CMKLR1	-1.70624	6.07314e-09
IMPA1	-1.70527	0.00077384
SNX20	-1.70219	2.71968e-23
ACAP1	-1.70093	1.80329e-18
NQO1	-1.69916	0.00481704
TNFSF9	-1.69714	1.28013e-05
CERKL	-1.69695	1.2262e-13
SPARCL1	-1.69599	0.0175513
SKAP1	-1.69396	2.93541e-19
CD96	-1.69346	1.04864e-19
EFR3A	-1.69324	0.00021464
IQGAP1	-1.69211	0.00114149
TSC22D3	-1.69133	6.96173e-07
S1PR4	-1.69118	3.7635e-15
FAM49B	-1.68948	5.66239e-05
CSF1	-1.68733	7.4081e-10
MTDH	-1.68441	0.00177924
UBA7	-1.68393	0.00125822
XAF1	-1.6798	8.64789e-11
SRGN	-1.67955	9.69473e-05
TRBV12-4	-1.6771	5.33617e-13
MYO1G	-1.67647	9.11777e-12
SLIT1	-1.67515	7.5465e-08
IGHV3-74	-1.67235	0.00235041
SLC7A7	-1.66956	7.10816e-12
RAP1GAP	-1.66941	3.91745e-06
AQP1	-1.66886	0.00040856
CTD-2521M24.9	-1.66834	3.31769e-09
LHFP	-1.66687	6.19553e-05
DOCK2	-1.66552	2.10756e-14
WIPF1	-1.66506	1.1724e-09
NAMA_1	-1.66286	0.00325321
IFI44	-1.66002	0.000166993
PARP12	-1.65885	2.92497e-09
RP11-432J24.5	-1.65555	0.000204491
PRKCDBP	-1.65462	0.00997208
NCF1	-1.6545	1.39781e-11
IFI35	-1.6528	6.40367e-10
EVI2A	-1.65109	1.68946e-11
UBASH3A	-1.65058	5.62665e-21
PTAFR	-1.65023	6.84806e-12
C10orf54	-1.64973	3.88848e-09
TGS1	-1.64962	0.000450587
TOX2	-1.64906	5.75769e-14
GGT1	-1.64733	0.000348533
PIK3AP1	-1.64623	1.99819e-08
LRRC25	-1.64269	2.1198e-10
SLC2A3	-1.64053	5.08021e-05
IL15RA	-1.64016	6.01705e-20
NFATC2	-1.63501	9.35992e-19
GJB2	-1.63176	0.0025913
IKZF1	-1.63122	1.19904e-17
PSME2	-1.62914	7.68222e-11
FGF9	-1.62836	0.0254751
TP53INP1	-1.62835	9.06014e-05
STAB1	-1.62768	1.4335e-06
CRABP2	-1.62745	0.000418533
FN1	-1.62701	0.0015917
KIF17	-1.62691	0.043527
RASSF4	-1.62658	2.3822e-08
SMARCA5	-1.62532	0.000960563
MNDA	-1.62232	4.68987e-09
GADD45G	-1.62175	1.5856e-05
DPYD	-1.61838	4.50599e-11
CHI3L2	-1.61753	1.213e-06
IGLV3-10	-1.61664	0.000187503
AIM2	-1.61414	7.79292e-19
SNX10	-1.61394	0.00167208
TRGV10	-1.61233	1.23727e-15
TSPYL5	-1.61228	0.00122547
MDM2	-1.61164	7.21942e-05
RAB2A	-1.60763	0.000118122
TRBJ2-1	-1.60591	8.57282e-10
ARFGEF1	-1.60373	0.00160309
IFIT3	-1.60166	0.000257646
GIMAP8	-1.60033	2.80009e-11
TMEM200B	-1.59976	0.0114261
WSB1	-1.59952	0.00584872
TAF2	-1.59938	0.0010732
CAPZA1	-1.59868	0.000679233
CXCL12	-1.59838	5.70993e-06
HPSE	-1.59651	1.02202e-08
IGHV3-66	-1.59513	4.05567e-05
TRBV2	-1.59249	2.20676e-11
RP11-341G23.4	-1.5915	0.00220094
CTSO	-1.59097	0.000610453
CD300LF	-1.58981	1.99731e-09
LILRB4	-1.58846	5.95144e-10
AC017104.6	-1.58786	0.000192545
CALHM2	-1.58613	0.00024442
KLHDC7B	-1.58187	3.42758e-18
PLEKHO1	-1.58138	1.64793e-05
MIR635	-1.58132	0.000151546
TRAV4	-1.58113	2.21278e-15
MFNG	-1.581	6.69151e-12
FABP5	-1.58076	0.000879473
SNX25	-1.57985	0.00177038
GPR34	-1.57945	1.4467e-06
NFAM1	-1.57751	2.48061e-12
CCDC64	-1.57623	8.63501e-06
MDGA1	-1.57567	5.48966e-07
NIPAL2	-1.57487	0.00111232
LYPLA1	-1.57442	0.0048713
RP11-20I20.4	-1.57424	0.00165007
MIR22HG	-1.5739	1.29085e-05
SYT11	-1.57242	0.000665468
BIRC3	-1.57065	1.16717e-12
KCND3	-1.57052	0.00140735
IGKV2-29	-1.57025	0.0291024
RP5-1028K7.2	-1.5702	3.96863e-17
HLA-G	-1.56979	0.000957246
TRBV5-1	-1.5684	4.96687e-12
THBS2	-1.56617	0.00301578
IFIT2	-1.56566	0.000232462
MSR1	-1.5645	3.94758e-10
LAT2	-1.56435	6.4666e-13
GDF15	-1.56397	0.0475127
PRKDC	-1.56289	0.00283374
EMC2	-1.56152	0.00161713
GAL3ST4	-1.56051	4.04612e-07
TRAM1	-1.56037	0.000698219
LINC00404	-1.56035	0.0396751
TNFRSF21	-1.56017	5.23507e-05
MAP1A	-1.55872	0.00319813
EMB	-1.55849	1.3202e-11
ABHD3	-1.55832	5.17636e-05
PILRA	-1.558	1.64256e-09
IGLV8-61	-1.55615	0.0091757
CD274	-1.55481	3.6843e-11
CITED1	-1.55368	0.00319748
NFATC4	-1.55314	0.00208441
DNAJC3	-1.55306	0.00123658
IFNG	-1.55224	1.65726e-19
LGMN	-1.55108	1.32676e-08
MRPL13	-1.54892	0.0005793
ATP2A3	-1.54716	3.74772e-07
PXDN	-1.54647	0.000371162
SCIMP	-1.54617	3.0005e-17
NMI	-1.54552	1.52143e-06
ATP1B1	-1.54477	0.00948662
CD58	-1.54458	0.000252757
ADAM19	-1.54444	2.81673e-10
PLEKHF2	-1.54338	0.000814108
TMEM37	-1.54252	1.15963e-06
SLC40A1	-1.5384	0.00136587
FAM105A	-1.53755	3.66821e-09
HK3	-1.5358	2.14421e-16
RHPN2	-1.53378	2.33876e-05
AC083843.4	-1.53227	0.000171426
NAAA	-1.52984	2.03737e-07
TAGAP	-1.52906	4.25509e-15
BCL2A1	-1.52646	2.71767e-05
MAN1A1	-1.52449	0.000163056
ARC	-1.52286	0.00457149
DERL1	-1.52042	1.10959e-05
CCNO	-1.51957	0.0122321
PHLDA2	-1.51802	0.00381269
TGFBI	-1.51671	0.00362827
DDX60L	-1.5161	6.88029e-06
FAM107B	-1.51591	2.67781e-07
CEBPD	-1.51551	0.000901176
AL122127.2	-1.51448	7.25055e-05
CD84	-1.51232	2.25409e-14
SLC1A1	-1.51202	8.47023e-05
DYSF	-1.51182	0.00300167
TMEM176B	-1.51166	0.00147082
C3	-1.5094	0.0291099
OXR1	-1.50931	0.00408111
CTD-2341M24.1	-1.50887	3.17725e-08
OLFML3	-1.50795	0.00211446
AK4	-1.50653	9.18139e-05
RNF19A	-1.50518	0.000711961
GIMAP1	-1.50503	4.25509e-15
CD79B	-1.505	0.00595154
UBR5	-1.50282	0.0023134
MIR4435-1HG	-1.50167	2.52936e-06
CCR7	-1.50145	3.66458e-12
CHL1-AS2	1.50773	0.0205705
HPGD	1.52442	0.0463266
WNK4	1.53938	0.000459303
RP11-63E9.1	1.55463	0.030023
PRRT4	1.58613	0.000916408
ENPP2	1.5976	0.0274656
KLC3	1.6164	8.95069e-05
EFS	1.68335	0.0101717
RP13-735L24.1	1.70625	0.00328567
ZNF667-AS1	1.74881	0.00904675
CTF1	1.87181	0.000696433
ALDH1L1	1.94354	2.36531e-05
COX6A2	1.9519	0.0116255
MLIP	2.08775	0.000509817
MSC	2.10065	0.0394385
AZGP1	2.5099	2.12461e-05
RP11-599J14.2	3.28614	0.000586882

## Sheet: Supplementary Table 3
Supplementary Table 3. Previously published mRNA signatures.
PMID	Title	Author_year	Symbol	formula
30556166	An 11‐gene‐based prognostic signature for uveal melanoma metastasis based on gene expression and DNA methylation profile	Li_2018	GJC1,TCEA1,MFSD3,FAF2,TLCD1,GPAA1,CYC1,ASAP1,JPH1,LDB3,KDELR3	risk score=1.10*GJC1+2.37*TCEA1+0.94*MFSD3+2.27*FAF2+0.88*TLCD1+0.98*GPAA1+1.01*CYC1+0.95*ASAP1+1.54*JPH1+1.60*LDB3+1.20*KDELR3
32309184	Identification of an immune-related signature for the prognosis of uveal melanoma	Li_2022	MANEAL,SLC44A3	risk score=-0.119*MANEAL-0.176*SLC44A3
33194647	Prognostic Implications of Novel Ten-Gene Signature in Uveal Melanoma	Luo_2020	STPG1,HMCES,ANXA2P2,CA12,RNF208,SLC44A3,TCTN1,POMGNT2,ULBP1,SIRT3	risk score=-0.150605911*STPG1-0.526265796*HMCES+0.017480411*ANXA2P2+0.414736428*CA12-0.098017226*RNF208-0.175213008*SLC44A3-0.171507956*TCTN1-0.106148114*POMGNT2+ 0.037591702*ULBP1-2.002826257*SIRT3
33367533	Machine learning-based integrative analysis of methylome and transcriptome identifies novel prognostic DNA methylation signature in uveal melanoma	Hou_2021	AZGP1,BAI1,CCDC74A,FUT3 ,PLCD1,S100A4,SCN8A,SEMA3B,SLC25A38,SLC44A3	risk score=-0.0096420*AZGP1+0.0227310*BAI1+0.0584049*CCDC74A-0.2563306*FUT3+0.0124631*PLCD1+ 0.0005874*S100A4-0.3786607*SCN8A-0.0132431*SEMA3B-0.0333145*SLC25A38-0.0645225*SLC44A3
33540700	A Novel Ferroptosis-Associated Gene Signature to Predict Prognosis in Patients with Uveal Melanoma	Luo_2021	STEAP3,MAP1LC3C,ITGA6,HMOX1,CD44,ALOX12,AIFM2/FSP1	risk score=0.055060532*STEAP3-0.202884346*MAP1LC3C+ 0.34461317*ITGA6+0.125266141*HMOX1-0.316011897*CD44-1.311120914*ALOX12+0.710789029*AIFM2/FSP1
33682883	An autophagy-related prognostic signature associated with immune microenvironment features of uveal melanoma	Zheng_2021	TUSC1,LMCD1,GABARAPL1,PRKCD,DLC1,FKBP1A,ITGA6,BNIP1,IKBKE	risk score=-0.0606*TUSC1-0.0480*LMCD1-0.0411*GABARAPL1-0.0319*PRKCD-0.0146*DLC1+0.0035*FKBP1A+0.09308*ITGA6+0.1349*BNIP1+0.1870*IKBKE
34124047	Identification of Precise Therapeutic Targets and Characteristic Prognostic Genes Based on Immune Gene Characteristics in Uveal Melanoma	Zhang_2021	PTGS2, CCL24, EPX, PAEP, LY9, PLXNB1, BDKRB2, NKIRAS1, HLA-A	risk score = 3.88*PTGS2 + 0.32*CCL24 - 1.25*EPX + 0.03*PAEP + 1.07*LY9 -0.007*PLXNB1 + 0.4*BDKRB2 - 0.19*NKIRAS1 + 0.0003*HLA-A
34198425	Immune marker signature helps to predict survival in uveal melanoma	Liu_2021_1	HLA-J,MMP12,HES6,ADAMDEC1	risk score=0.764*HLA-J+0.552*MMP12+2.755*HES6-0.505*ADAMDEC1
34434692	A Novel 8-Gene Prognostic Signature for Survival Prediction of Uveal Melanoma	Tang_2021	RPL10A,EIF1B,TIPARP,RPL15,SLC25A38,PHLDA1,TFDP2,MEGF10	risk score=0.720*RPL10A-0.354*EIF1B-0.076*TIPARP-0.434*RPL15-0.066*SLC25A38-0.044*PHLDA1-0.397*TFDP2-0.017*MEGF10
34630418	A Comprehensive Prognostic and Immunological Analysis of a Six_x0002_Gene Signature Associated With Glycolysis and Immune Response in Uveal Melanoma	Liu_2021_2	ARPC1B,BTBD6,GUSB,KRTCAP2,RHBDD3,SLC39A4	risk score=3.8*ARPC1B+4.02*BTBD6+1.02*GUSB+2.10*KRTCAP2-6.65*RHBDD3+2.25*SLC39A4
34743576	Identification of molecular subtyping system and four-gene prognostic signature with immune-related genes for uveal melanoma	Xia_2022	IL32,IRF1,SNX20,VAV1	risk score=1.6053524*IL32+0.9498871*IRF1-1.6222937*SNX20-2.0783539*VAV1
34814288	Construction and validation of a novel prognostic signature for uveal melanoma based on five metabolism-related genes	Zhao_2021	MDH2,NME1,NT5C2,PC,ENPP1	risk score=2.761058*MDH2+1.384644*NME1+1.056515*NT5C2-1.443098*PC-0.732329*ENPP1
34901006	Construction and Validation of a Novel Pyroptosis-Related Gene Signature to Predict the Prognosis of Uveal Melanoma	Cao_2021	ANO6,CEBPB,TMEM173,TXNIP,VIM	risk score=0.00750335379446634*ANO6+0.0110094507963823*CEBPB+0.00320430405522329*TMEM173-0.00165919015758192*TXNIP-9.89378996691334e-05*VIM
35102195	Construction and validation of a pyroptosis‑related gene signature associated with the tumor microenvironment in uveal melanoma	Zhang_2022	GSDMC,GSDMD,IL6,NLRP6,PLCG1	risk score=1.730*GSDMC+0.318*GSDMD+1.735*IL6+2.540*NLRP6+0.186*PLCG1
35242144	A Necroptosis-Related Prognostic Model of Uveal Melanoma Was Constructed by Single-Cell Sequencing Analysis and Weighted Co-Expression Network Analysis Based on Public Databases	Xie_2022	KDELR3, IDH2, S100A6, ITPA, PARP8, ARPC1B	riskscore = KDELR3*0.48277442+IDH2*0.17659443+S100A6*0.18023750+ITPA*0.20786934+PARP8*0.05236899+ARPC1B*0.07652656
35300699	Integrative analysis identifes key genes related to metastasis and a robust gene-based prognostic signature in uveal melanoma	Lei_2022	EEFSEC,EEF1A2,ALDH1A3,CTNNB1,COMMD2	risk score=-0.422*EEFSEC+0.355*EEF1A2-0.349*ALDH1A3-0.274*CTNNB1-0.432*COMMD2
35390784	Identification of Survival-Related Metabolic Genes and a Novel Gene Signature Predicting the Overall Survival for Patients with Uveal Melanoma	Guo_2022	SLC25A38,ABCA12,CA12,SYNJ2	risk score=-0.246*SLC25A38-0.50186*ABCA12+0.032*CA12+0.086*SYNJ2
35990996	EMT-Related Gene Signature Predicts the Prognosis in Uveal Melanoma Patients	Lv_2022	KCTD17,AMN,DOCK10,ARC,PTGER4,TRPV2,S100A4,LHFPL3,CA12,POMC,MANEAL,CAMSAP3,LMCD1,MLIP	risk score=-0.65*KCTD17+0.74*AMN+0.0060*DOCK10+0.17*ARC+0.025*PTGER4-0.018*TRPV2+0.011*S100A4+0.28*LHFPL3+0.12*CA12+0.0060*POMC-0.48*MANEAL+0.28*CAMSAP3-1.37*LMCD1-0.27*MLIP
36111345	Identifification of a prognostic model using cuproptosis-related genes in uveal melanoma	Chen_2022	LIAS,LIPT1,DLD,PDHA,PDHB,MTF1,GLS,CDKN2A	risk score=-0.764*LIAS+0.0503*LIPT1+1.847*DLD+0.230*PDHA1-0.776*PDHB-0.501*MTF1-0.067*GLS+0.355*CDKN2A

## Sheet: Supplementary table 4
Supplementary Table 4. GSEA results of ICDscore-high and ICDscore-low subgroups in the TCGA-UVM dataset.
ID	enrichmentScore	NES	pvalue	p.adjust	qvalue
GOBP_POSITIVE_REGULATION_OF_CHEMOTAXIS	0.756231	1.64668	7.9e-09	1.21e-06	9.61e-07
GOBP_POSITIVE_REGULATION_OF_T_CELL_PROLIFERATION	0.769769	1.64357	2.07e-07	1.96e-05	1.56e-05
GOBP_HUMORAL_IMMUNE_RESPONSE_MEDIATED_BY_CIRCULATING_IMMUNOGLOBULIN	0.768478	1.643	5.46e-08	6.31e-06	5.02e-06
GOBP_ANTIGEN_PROCESSING_AND_PRESENTATION_OF_EXOGENOUS_PEPTIDE_ANTIGEN	0.849692	1.64164	2.69e-05	0.00114158	0.000908703
GOBP_REGULATION_OF_T_CELL_PROLIFERATION	0.748288	1.64096	1.56e-09	2.75e-07	2.19e-07
GOBP_REGULATION_OF_MONONUCLEAR_CELL_MIGRATION	0.763561	1.63549	8.85e-08	9.58e-06	7.63e-06
GOBP_B_CELL_MEDIATED_IMMUNITY	0.739531	1.62833	1.15e-10	3.53e-08	2.81e-08
GOBP_B_CELL_RECEPTOR_SIGNALING_PATHWAY	0.758952	1.62815	1.25e-07	1.29e-05	1.03e-05
GOBP_POSITIVE_REGULATION_OF_LEUKOCYTE_CHEMOTAXIS	0.765885	1.62601	5.54e-07	4.43e-05	3.53e-05
GOBP_T_CELL_PROLIFERATION	0.733501	1.61848	9e-10	1.73e-07	1.38e-07
GOBP_NEGATIVE_REGULATION_OF_LEUKOCYTE_CELL_CELL_ADHESION	0.74383	1.61787	3.52e-08	4.36e-06	3.47e-06
GOBP_LEUKOCYTE_CELL_CELL_ADHESION	0.72116	1.61652	1e-10	3.25e-08	2.59e-08
GOBP_MONONUCLEAR_CELL_MIGRATION	0.732593	1.61265	1.59e-09	2.75e-07	2.19e-07
GOBP_ANTIGEN_PROCESSING_AND_PRESENTATION_OF_EXOGENOUS_ANTIGEN	0.813599	1.6112	3.54e-05	0.00139553	0.00111085
GOBP_POSITIVE_REGULATION_OF_LEUKOCYTE_PROLIFERATION	0.738266	1.6112	1.31e-08	1.84e-06	1.47e-06
GOBP_REGULATION_OF_LEUKOCYTE_PROLIFERATION	0.723195	1.60824	1e-10	3.25e-08	2.59e-08
GOBP_PEPTIDE_ANTIGEN_ASSEMBLY_WITH_MHC_PROTEIN_COMPLEX	0.924483	1.60544	5.86e-05	0.00208646	0.00166084
GOBP_COMPLEMENT_ACTIVATION	0.744667	1.60085	6.61e-07	4.91e-05	3.91e-05
GOBP_ANTIGEN_RECEPTOR_MEDIATED_SIGNALING_PATHWAY	0.721061	1.5992	8.8e-10	1.73e-07	1.38e-07
GOBP_POSITIVE_REGULATION_OF_LEUKOCYTE_CELL_CELL_ADHESION	0.72011	1.59904	1.91e-10	5.29e-08	4.21e-08
GOBP_REGULATION_OF_T_CELL_ACTIVATION	0.713321	1.59505	1e-10	3.25e-08	2.59e-08
GOBP_MONOCYTE_CHEMOTAXIS	0.774174	1.59401	3.1e-05	0.00126949	0.00101052
GOBP_ADAPTIVE_IMMUNE_RESPONSE_BASED_ON_SOMATIC_RECOMBINATION_OF_IMMUNE_RECEPTORS_BUILT_FROM_IMMUNOGLOBULIN_SUPERFAMILY_DOMAINS	0.712187	1.59337	1e-10	3.25e-08	2.59e-08
GOBP_DENDRITIC_CELL_DIFFERENTIATION	0.7959	1.59049	6.09e-05	0.00212307	0.00168998
GOBP_T_CELL_ACTIVATION	0.707837	1.59035	1e-10	3.25e-08	2.59e-08
GOBP_POSITIVE_REGULATION_OF_LEUKOCYTE_MIGRATION	0.7301	1.58978	3.64e-07	3.11e-05	2.48e-05
GOBP_LYMPHOCYTE_MEDIATED_IMMUNITY	0.709446	1.58653	1e-10	3.25e-08	2.59e-08
GOBP_RESPONSE_TO_INTERFERON_BETA	0.853024	1.58501	0.000214188	0.00548342	0.00436483
GOBP_PEPTIDE_ANTIGEN_ASSEMBLY_WITH_MHC_CLASS_II_PROTEIN_COMPLEX	0.956127	1.58431	2.46e-05	0.00107422	0.000855083
GOBP_POSITIVE_REGULATION_OF_RESPONSE_TO_EXTERNAL_STIMULUS	0.703169	1.58044	1e-10	3.25e-08	2.59e-08
GOBP_POSITIVE_REGULATION_OF_B_CELL_ACTIVATION	0.727833	1.58035	1.69e-06	0.000120064	9.56e-05
GOBP_POSITIVE_REGULATION_OF_MONONUCLEAR_CELL_MIGRATION	0.769553	1.57964	3.81e-05	0.00148899	0.00118525
GOBP_ANTIGEN_PROCESSING_AND_PRESENTATION	0.739926	1.57866	4.04e-06	0.000272564	0.000216962
GOBP_POSITIVE_REGULATION_OF_CELL_ACTIVATION	0.702869	1.57745	1e-10	3.25e-08	2.59e-08
GOBP_CELL_ADHESION_MEDIATED_BY_INTEGRIN	0.753894	1.5768	1.82e-05	0.000898703	0.000715373
GOBP_ACTIVATION_OF_IMMUNE_RESPONSE	0.704048	1.57647	1e-10	3.25e-08	2.59e-08
GOBP_REGULATION_OF_VIRAL_PROCESS	0.72198	1.5745	3.09e-07	2.72e-05	2.17e-05
GOBP_REGULATION_OF_T_CELL_DIFFERENTIATION	0.721471	1.5741	3.65e-07	3.11e-05	2.48e-05
GOBP_ALPHA_BETA_T_CELL_PROLIFERATION	0.808018	1.57343	0.000279999	0.00699593	0.0055688
GOBP_NEGATIVE_REGULATION_OF_VIRAL_GENOME_REPLICATION	0.780762	1.5731	7.21e-05	0.00240255	0.00191244
GOBP_LEUKOCYTE_MEDIATED_IMMUNITY	0.699286	1.57151	1e-10	3.25e-08	2.59e-08
GOBP_LYMPHOCYTE_HOMEOSTASIS	0.765416	1.57115	5.57e-05	0.00201172	0.00160134
GOBP_REGULATION_OF_MONOCYTE_CHEMOTAXIS	0.853449	1.57083	0.000348889	0.00820442	0.00653077
GOBP_ANTIGEN_PROCESSING_AND_PRESENTATION_OF_PEPTIDE_ANTIGEN	0.769754	1.56998	5.44e-05	0.00197706	0.00157375
GOBP_REGULATION_OF_LEUKOCYTE_DIFFERENTIATION	0.702578	1.56994	8.4e-10	1.73e-07	1.38e-07
GOBP_REGULATION_OF_B_CELL_ACTIVATION	0.712824	1.56771	7.01e-08	7.75e-06	6.17e-06
GOBP_NEGATIVE_REGULATION_OF_LYMPHOCYTE_ACTIVATION	0.717907	1.56677	3.74e-07	3.13e-05	2.49e-05
GOBP_ANTIGEN_PROCESSING_AND_PRESENTATION_OF_EXOGENOUS_PEPTIDE_ANTIGEN_VIA_MHC_CLASS_II	0.842329	1.56514	0.00039628	0.00879201	0.00699849
GOBP_LEUKOCYTE_PROLIFERATION	0.698892	1.56315	1e-10	3.25e-08	2.59e-08
GOBP_REGULATION_OF_GRANULOCYTE_CHEMOTAXIS	0.77954	1.56236	0.000194793	0.00511283	0.00406985
GOBP_POSITIVE_REGULATION_OF_HEMOPOIESIS	0.714471	1.55994	6.54e-07	4.91e-05	3.91e-05
GOBP_POSITIVE_REGULATION_OF_PEPTIDYL_THREONINE_PHOSPHORYLATION	0.838763	1.55851	0.000510316	0.0104953	0.0083543
GOBP_ANTIGEN_PROCESSING_AND_PRESENTATION_OF_PEPTIDE_OR_POLYSACCHARIDE_ANTIGEN_VIA_MHC_CLASS_II	0.819698	1.55785	0.000615346	0.0117572	0.00935879
GOBP_T_HELPER_1_TYPE_IMMUNE_RESPONSE	0.786286	1.55711	0.000303922	0.00734643	0.0058478
GOBP_T_CELL_DIFFERENTIATION	0.699432	1.55704	4.7e-09	7.64e-07	6.08e-07
GOBP_B_CELL_ACTIVATION	0.695686	1.55675	2.16e-10	5.34e-08	4.25e-08
GOBP_POSITIVE_REGULATION_OF_TUMOR_NECROSIS_FACTOR_SUPERFAMILY_CYTOKINE_PRODUCTION	0.728488	1.55589	2.65e-05	0.00114158	0.000908703
GOBP_B_CELL_DIFFERENTIATION	0.714893	1.55493	3.1e-06	0.000212153	0.000168875
GOBP_NEGATIVE_REGULATION_OF_T_CELL_PROLIFERATION	0.757467	1.55484	9.05e-05	0.0028337	0.00225564
GOBP_PRODUCTION_OF_MOLECULAR_MEDIATOR_OF_IMMUNE_RESPONSE	0.695059	1.55438	3.78e-10	8.93e-08	7.11e-08
GOBP_NEGATIVE_REGULATION_OF_CELL_CELL_ADHESION	0.705077	1.55191	2.41e-07	2.24e-05	1.78e-05
GOBP_LYMPHOCYTE_MIGRATION	0.723571	1.55149	7.49e-06	0.000458086	0.000364639
GOBP_IMMUNE_RESPONSE_REGULATING_CELL_SURFACE_RECEPTOR_SIGNALING_PATHWAY	0.693729	1.55111	6.24e-10	1.35e-07	1.08e-07
GOBP_REGULATION_OF_LEUKOCYTE_MIGRATION	0.70033	1.55029	9.63e-08	1.02e-05	8.13e-06
GOBP_DENDRITIC_CELL_MIGRATION	0.811801	1.54811	0.00055062	0.0110485	0.0087947
GOBP_POSITIVE_REGULATION_OF_PHAGOCYTOSIS	0.750778	1.54797	6.32e-05	0.00217363	0.00173022
GOBP_REGULATION_OF_LYMPHOCYTE_DIFFERENTIATION	0.704597	1.5474	2.76e-07	2.47e-05	1.97e-05
GOBP_NEGATIVE_REGULATION_OF_T_CELL_DIFFERENTIATION	0.781211	1.54706	0.000438398	0.00945374	0.00752523
GOBP_CYTOKINE_PRODUCTION_INVOLVED_IN_IMMUNE_RESPONSE	0.724396	1.54646	3.86e-05	0.00149603	0.00119085
GOBP_NEGATIVE_REGULATION_OF_VIRAL_PROCESS	0.733025	1.54581	5.3e-05	0.00194085	0.00154492
GOBP_T_CELL_MEDIATED_IMMUNITY	0.723724	1.54575	1.39e-05	0.000735206	0.000585228
GOBP_METAPHASE_ANAPHASE_TRANSITION_OF_CELL_CYCLE	0.75171	1.54302	0.000133578	0.00392206	0.00312199
GOBP_MONONUCLEAR_CELL_DIFFERENTIATION	0.686677	1.54271	1e-10	3.25e-08	2.59e-08
GOBP_REGULATION_OF_PHAGOCYTOSIS	0.723433	1.54213	2.98e-05	0.00124907	0.00099427
GOBP_INTERLEUKIN_12_PRODUCTION	0.752871	1.5416	0.000310429	0.00743456	0.00591795
GOBP_REGULATION_OF_LEUKOCYTE_APOPTOTIC_PROCESS	0.732985	1.54074	4.48e-05	0.00170082	0.00135386
GOBP_REGULATION_OF_LEUKOCYTE_CHEMOTAXIS	0.715444	1.53968	1.91e-05	0.000934854	0.000744149
GOBP_POSITIVE_REGULATION_OF_RESPONSE_TO_BIOTIC_STIMULUS	0.70193	1.5395	1.71e-06	0.000120302	9.58e-05
GOBP_REGULATION_OF_LYMPHOCYTE_MIGRATION	0.754072	1.5392	0.000147457	0.00426829	0.00339758
GOBP_HUMORAL_IMMUNE_RESPONSE	0.68779	1.53916	5.92e-09	9.32e-07	7.42e-07
GOBP_REGULATION_OF_VIRAL_GENOME_REPLICATION	0.733278	1.53912	0.000115862	0.00349139	0.00277916
GOBP_POSITIVE_REGULATION_OF_CELL_CELL_ADHESION	0.688081	1.53876	1.4e-08	1.91e-06	1.52e-06
GOBP_T_CELL_ACTIVATION_INVOLVED_IN_IMMUNE_RESPONSE	0.716093	1.53688	7.92e-06	0.000473131	0.000376615
GOBP_CELLULAR_RESPONSE_TO_INTERFERON_BETA	0.862133	1.53563	0.00145347	0.0213485	0.0169935
GOBP_POSITIVE_REGULATION_OF_DEFENSE_RESPONSE	0.68759	1.53529	8.65e-09	1.28e-06	1.02e-06
GOBP_REGULATION_OF_T_HELPER_1_TYPE_IMMUNE_RESPONSE	0.821102	1.53501	0.000712692	0.0128675	0.0102426
GOBP_NEGATIVE_REGULATION_OF_LEUKOCYTE_PROLIFERATION	0.727754	1.5347	9.93e-05	0.00308946	0.00245922
GOBP_CELL_ACTIVATION_INVOLVED_IN_IMMUNE_RESPONSE	0.686744	1.53455	2.05e-08	2.66e-06	2.12e-06
GOBP_REGULATION_OF_LYMPHOCYTE_APOPTOTIC_PROCESS	0.755565	1.53236	0.000443694	0.00952842	0.00758467
GOBP_NEGATIVE_REGULATION_OF_CELL_ACTIVATION	0.692877	1.53193	5.33e-07	4.33e-05	3.45e-05
GOBP_CELLULAR_RESPONSE_TO_VIRUS	0.734698	1.53146	0.000143563	0.00419157	0.00333651
GOBP_TYPE_2_IMMUNE_RESPONSE	0.788707	1.53106	0.000813117	0.0141804	0.0112877
GOBP_POSITIVE_REGULATION_OF_MONOCYTE_CHEMOTAXIS	0.864488	1.53059	0.00121166	0.0190454	0.0151602
GOBP_MITOTIC_SISTER_CHROMATID_SEGREGATION	0.698121	1.52922	5.5e-06	0.000357314	0.000284424
GOBP_CELLULAR_DEFENSE_RESPONSE	0.760387	1.52786	0.000649581	0.0120937	0.00962665
GOBP_REGULATION_OF_DENDRITIC_CELL_DIFFERENTIATION	0.912333	1.52697	0.00108113	0.0177245	0.0141088
GOBP_REGULATION_OF_CELL_ADHESION_MEDIATED_BY_INTEGRIN	0.767887	1.52676	0.000713071	0.0128675	0.0102426
GOBP_POSITIVE_REGULATION_OF_CYTOKINE_PRODUCTION_INVOLVED_IN_IMMUNE_RESPONSE	0.743153	1.52644	0.000360522	0.00832725	0.00662854
GOBP_REGULATION_OF_CELL_CELL_ADHESION	0.679364	1.52612	1e-10	3.25e-08	2.59e-08
GOBP_IMMUNOGLOBULIN_PRODUCTION	0.690026	1.52589	6.53e-07	4.91e-05	3.91e-05
GOBP_SEQUESTERING_OF_CALCIUM_ION	0.706453	1.52565	1.32e-05	0.000708003	0.000563574
GOBP_REGULATION_OF_HEMOPOIESIS	0.680868	1.52518	1.93e-10	5.29e-08	4.21e-08
GOBP_PHAGOCYTOSIS	0.680831	1.52466	2.34e-08	2.96e-06	2.36e-06
GOBP_ENDOTHELIAL_CELL_CHEMOTAXIS	0.809287	1.52351	0.000654051	0.0120937	0.00962665
GOBP_MITOCHONDRIAL_RESPIRATORY_CHAIN_COMPLEX_ASSEMBLY	0.723658	1.52321	0.000183186	0.00490731	0.00390624
GOBP_IMMUNE_RESPONSE_REGULATING_SIGNALING_PATHWAY	0.678086	1.52303	1e-10	3.25e-08	2.59e-08
GOBP_MEMBRANE_INVAGINATION	0.70469	1.52303	2.16e-05	0.00100449	0.00079958
GOBP_GRANULOCYTE_CHEMOTAXIS	0.706276	1.52197	2.66e-05	0.00114158	0.000908703
GOBP_LEUKOCYTE_MEDIATED_CYTOTOXICITY	0.703811	1.52182	2.39e-05	0.00106625	0.000848738
GOBP_POSITIVE_REGULATION_OF_INNATE_IMMUNE_RESPONSE	0.700756	1.52155	2.35e-05	0.00106138	0.000844863
GOBP_LYMPHOCYTE_APOPTOTIC_PROCESS	0.734901	1.52154	0.000305616	0.00735318	0.00585317
GOBP_RESPONSE_TO_VIRUS	0.679043	1.52117	2.03e-10	5.29e-08	4.21e-08
GOBP_REGULATION_OF_T_CELL_MIGRATION	0.775363	1.52105	0.00107378	0.0176596	0.0140571
GOBP_POSITIVE_REGULATION_OF_COAGULATION	0.836455	1.52085	0.00155936	0.0224488	0.0178693
GOBP_POSITIVE_REGULATION_OF_CYTOKINE_PRODUCTION	0.676634	1.52085	1e-10	3.25e-08	2.59e-08
GOBP_REGULATION_OF_LIPID_KINASE_ACTIVITY	0.739704	1.51998	0.000358912	0.00832709	0.00662841
GOBP_POSITIVE_REGULATION_OF_VIRAL_PROCESS	0.74521	1.51992	0.000498508	0.0103217	0.00821613
GOBP_POSITIVE_REGULATION_OF_ALPHA_BETA_T_CELL_PROLIFERATION	0.841636	1.51959	0.00142388	0.0210824	0.0167817
GOBP_POSITIVE_REGULATION_OF_MACROPHAGE_MIGRATION	0.833821	1.51918	0.000796452	0.0139366	0.0110936
GOBP_DEFENSE_RESPONSE_TO_SYMBIONT	0.680296	1.5189	5.44e-08	6.31e-06	5.02e-06
GOBP_REGULATION_OF_ALPHA_BETA_T_CELL_ACTIVATION	0.710596	1.51608	8.25e-05	0.00266379	0.00212039
GOBP_POSITIVE_REGULATION_OF_LYMPHOCYTE_DIFFERENTIATION	0.709109	1.51598	8.45e-05	0.0027114	0.00215829
GOBP_LIPOPOLYSACCHARIDE_MEDIATED_SIGNALING_PATHWAY	0.742441	1.51546	0.000358219	0.00832709	0.00662841
GOBP_POSITIVE_REGULATION_OF_IMMUNE_EFFECTOR_PROCESS	0.682678	1.51509	2.47e-07	2.25e-05	1.79e-05
GOBP_POSITIVE_REGULATION_OF_CELL_KILLING	0.739846	1.51493	0.000654862	0.0120937	0.00962665
GOBP_T_CELL_HOMEOSTASIS	0.77746	1.51392	0.0013507	0.0205854	0.0163861
GOBP_POSITIVE_REGULATION_OF_ALPHA_BETA_T_CELL_ACTIVATION	0.737041	1.51389	0.000539603	0.0108694	0.00865214
GOBP_CELL_KILLING	0.688335	1.51292	6.24e-06	0.000395643	0.000314934
GOBP_T_CELL_RECEPTOR_SIGNALING_PATHWAY	0.701056	1.51288	7.68e-05	0.00252627	0.00201093
GOBP_GRANULOCYTE_MIGRATION	0.692918	1.5118	1.07e-05	0.000603406	0.000480315
GOBP_LEUKOCYTE_APOPTOTIC_PROCESS	0.706809	1.51115	5.11e-05	0.00188351	0.00149928
GOBP_DENDRITIC_CELL_CHEMOTAXIS	0.820823	1.51078	0.00185198	0.0253951	0.0202146
GOBP_TUMOR_NECROSIS_FACTOR_SUPERFAMILY_CYTOKINE_PRODUCTION	0.687323	1.51069	7.44e-06	0.000458086	0.000364639
GOBP_REGULATION_OF_B_CELL_PROLIFERATION	0.736748	1.51063	0.000612234	0.0117409	0.00934581
GOBP_POSITIVE_REGULATION_OF_CALCIUM_ION_TRANSPORT	0.703666	1.51021	2.7e-05	0.00114158	0.000908703
GOBP_REGULATION_OF_ANTIGEN_RECEPTOR_MEDIATED_SIGNALING_PATHWAY	0.736299	1.5097	0.000653392	0.0120937	0.00962665
GOBP_T_CELL_MEDIATED_CYTOTOXICITY	0.756766	1.50918	0.00115167	0.0185657	0.0147784
GOBP_LEUKOCYTE_MIGRATION	0.67317	1.50827	9.33e-10	1.73e-07	1.38e-07
GOBP_REGULATION_OF_RESPONSE_TO_BIOTIC_STIMULUS	0.674127	1.50747	3.97e-09	6.66e-07	5.3e-07
GOBP_LYMPHOCYTE_CHEMOTAXIS	0.738074	1.50742	0.000719976	0.0129025	0.0102704
GOBP_POSITIVE_REGULATION_OF_CHEMOKINE_PRODUCTION	0.734388	1.5072	0.000468961	0.00986717	0.00785433
GOBP_RENAL_FILTRATION	0.828945	1.5072	0.00196408	0.0263754	0.020995
GOBP_LEUKOCYTE_CHEMOTAXIS	0.678711	1.50554	1.59e-06	0.000114624	9.12e-05
GOBP_LYMPHOCYTE_ACTIVATION_INVOLVED_IN_IMMUNE_RESPONSE	0.683598	1.50457	4.64e-06	0.000309415	0.000246296
GOBP_UNSATURATED_FATTY_ACID_BIOSYNTHETIC_PROCESS	0.749541	1.50224	0.00145418	0.0213485	0.0169935
GOBP_CYTOCHROME_COMPLEX_ASSEMBLY	0.782478	1.50203	0.00288849	0.0344804	0.0274466
GOBP_CELLULAR_MODIFIED_AMINO_ACID_BIOSYNTHETIC_PROCESS	0.75814	1.50138	0.00133637	0.020487	0.0163078
GOBP_DEFENSE_RESPONSE_TO_BACTERIUM	0.670994	1.50133	1.07e-08	1.54e-06	1.23e-06
GOBP_POSITIVE_REGULATION_OF_LEUKOCYTE_MEDIATED_IMMUNITY	0.694404	1.5008	6.4e-05	0.00217363	0.00173022
GOBP_REGULATION_OF_ENDOTHELIAL_CELL_CHEMOTAXIS	0.825244	1.50047	0.00227356	0.0290905	0.0231562
GOBP_POSITIVE_REGULATION_OF_PRODUCTION_OF_MOLECULAR_MEDIATOR_OF_IMMUNE_RESPONSE	0.699726	1.50036	7.5e-05	0.00248278	0.00197631
GOBP_APOPTOTIC_PROCESS_INVOLVED_IN_MORPHOGENESIS	0.815147	1.50033	0.00245811	0.030694	0.0244326
GOBP_POSITIVE_REGULATION_OF_TYPE_I_INTERFERON_PRODUCTION	0.742049	1.50026	0.00112795	0.0183761	0.0146275
GOBP_FEMALE_MEIOTIC_NUCLEAR_DIVISION	0.802267	1.4998	0.0015241	0.0220633	0.0175625
GOBP_REGULATION_OF_CHROMOSOME_SEPARATION	0.725194	1.49966	0.000368683	0.00844072	0.00671886
GOBP_REGULATION_OF_T_CELL_RECEPTOR_SIGNALING_PATHWAY	0.760256	1.49939	0.001047	0.0174399	0.0138823
GOBP_T_CELL_DIFFERENTIATION_IN_THYMUS	0.721445	1.49933	0.000601434	0.0115765	0.00921495
GOBP_RESPONSE_TO_TYPE_I_INTERFERON	0.733996	1.49909	0.000947879	0.0160742	0.0127951
GOBP_THYMIC_T_CELL_SELECTION	0.837793	1.49897	0.00170259	0.0239145	0.0190361
GOBP_CELL_CHEMOTAXIS	0.669584	1.49797	4.27e-08	5.17e-06	4.11e-06
GOBP_RESPONSE_TO_TUMOR_NECROSIS_FACTOR	0.674713	1.49708	7.56e-07	5.53e-05	4.4e-05
GOBP_T_CELL_MIGRATION	0.729221	1.49686	0.000909607	0.0154991	0.0123374
GOBP_CYTOKINE_MEDIATED_SIGNALING_PATHWAY	0.665849	1.49665	1e-10	3.25e-08	2.59e-08
GOBP_POSITIVE_REGULATION_OF_INTERLEUKIN_1_PRODUCTION	0.727965	1.49635	0.000716737	0.0128889	0.0102596
GOBP_CELL_CYCLE_G2_M_PHASE_TRANSITION	0.686906	1.49549	4.9e-05	0.00182056	0.00144917
GOBP_NEGATIVE_REGULATION_OF_CD4_POSITIVE_ALPHA_BETA_T_CELL_ACTIVATION	0.793888	1.49453	0.00163462	0.0232743	0.0185265
GOBP_REGULATION_OF_ADAPTIVE_IMMUNE_RESPONSE	0.680367	1.49418	6.35e-06	0.000397725	0.000316592
GOBP_TUMOR_NECROSIS_FACTOR_MEDIATED_SIGNALING_PATHWAY	0.699738	1.49404	0.000418814	0.00906907	0.00721903
GOBP_MYELOID_CELL_ACTIVATION_INVOLVED_IN_IMMUNE_RESPONSE	0.701888	1.49339	0.000372122	0.00845378	0.00672925
GOBP_NEGATIVE_REGULATION_OF_IMMUNE_SYSTEM_PROCESS	0.664629	1.49306	4.8e-10	1.09e-07	8.64e-08
GOBP_T_CELL_SELECTION	0.746999	1.49277	0.00197504	0.0264543	0.0210578
GOBP_PHAGOCYTOSIS_RECOGNITION	0.707704	1.49242	0.000494529	0.0103153	0.008211
GOBP_PROTEIN_LOCALIZATION_TO_ENDOPLASMIC_RETICULUM	0.726474	1.49218	0.00129111	0.0199106	0.015849
GOBP_B_CELL_PROLIFERATION	0.697956	1.49001	0.000327529	0.00780811	0.0062153
GOBP_GLUCOSAMINE_CONTAINING_COMPOUND_METABOLIC_PROCESS	0.825215	1.48994	0.00262134	0.0320544	0.0255155
GOBP_ELECTRON_TRANSPORT_CHAIN	0.680285	1.48837	1.77e-05	0.000894154	0.000711752
GOBP_REGULATION_OF_PROTEIN_MATURATION	0.725077	1.48835	0.00127045	0.019709	0.0156885
GOBP_MEMBRANE_LIPID_BIOSYNTHETIC_PROCESS	0.683989	1.48776	0.000113267	0.0034424	0.00274017
GOBP_RECEPTOR_INTERNALIZATION	0.693755	1.48597	0.000260317	0.0065356	0.00520237
GOBP_CALCIUM_ION_TRANSMEMBRANE_TRANSPORT	0.66432	1.48564	1.47e-07	1.5e-05	1.19e-05
GOBP_REGULATION_OF_PRODUCTION_OF_MOLECULAR_MEDIATOR_OF_IMMUNE_RESPONSE	0.678196	1.48379	2.08e-05	0.000983035	0.000782501
GOBP_IMMUNOGLOBULIN_PRODUCTION_INVOLVED_IN_IMMUNOGLOBULIN_MEDIATED_IMMUNE_RESPONSE	0.722807	1.48369	0.00139439	0.0209441	0.0166716
GOBP_NATURAL_KILLER_CELL_ACTIVATION	0.697257	1.48354	0.000525959	0.0106774	0.00849926
GOBP_DETECTION_OF_LIGHT_STIMULUS	0.722657	1.48338	0.00139439	0.0209441	0.0166716
GOBP_ZYMOGEN_ACTIVATION	0.724207	1.4829	0.00183437	0.0252201	0.0200754
GOBP_ACUTE_INFLAMMATORY_RESPONSE_TO_ANTIGENIC_STIMULUS	0.815482	1.48272	0.003804	0.0411006	0.0327163
GOBP_CHROMOSOME_SEPARATION	0.696792	1.4827	0.000594137	0.0115214	0.00917109
GOBP_NEUTROPHIL_CHEMOTAXIS	0.692911	1.48138	0.000571205	0.0112063	0.0089203
GOBP_REGULATION_OF_CALCIUM_ION_TRANSMEMBRANE_TRANSPORT	0.67881	1.48096	8.56e-05	0.0027114	0.00215829
GOBP_POSITIVE_REGULATION_OF_PROTEIN_KINASE_B_SIGNALING	0.690021	1.48093	0.000116223	0.00349139	0.00277916
GOBP_ATTACHMENT_OF_SPINDLE_MICROTUBULES_TO_KINETOCHORE	0.776537	1.48086	0.00306358	0.0358287	0.0285198
GOBP_POSITIVE_REGULATION_OF_LYMPHOCYTE_MIGRATION	0.766433	1.48078	0.00423575	0.0446515	0.0355429
GOBP_POSITIVE_REGULATION_OF_INTERFERON_BETA_PRODUCTION	0.762772	1.48072	0.00324058	0.0369035	0.0293754
GOBP_ISOPRENOID_BIOSYNTHETIC_PROCESS	0.79204	1.48068	0.00297112	0.0351729	0.0279978
GOBP_TYPE_I_INTERFERON_PRODUCTION	0.697174	1.48013	0.000557257	0.0111166	0.00884891
GOBP_NEGATIVE_REGULATION_OF_ANTIGEN_RECEPTOR_MEDIATED_SIGNALING_PATHWAY	0.775592	1.47906	0.00324512	0.0369035	0.0293754
GOBP_POSITIVE_REGULATION_OF_LYMPHOCYTE_MEDIATED_IMMUNITY	0.691722	1.4789	0.000170633	0.00465176	0.00370282
GOBP_VIRAL_GENOME_REPLICATION	0.683919	1.47881	0.000149498	0.00426891	0.00339808
GOBP_RESPONSE_TO_INTERFERON_GAMMA	0.680485	1.47874	0.000214085	0.00548342	0.00436483
GOBP_ENDOPLASMIC_RETICULUM_TO_GOLGI_VESICLE_MEDIATED_TRANSPORT	0.68101	1.47868	0.000157932	0.00441276	0.00351258
GOBP_TOLERANCE_INDUCTION	0.790553	1.4779	0.00315537	0.0364701	0.0290304
GOBP_POSITIVE_REGULATION_OF_MYELOID_LEUKOCYTE_DIFFERENTIATION	0.730747	1.47741	0.00256366	0.0317223	0.0252511
GOBP_POSITIVE_CHEMOTAXIS	0.723684	1.47674	0.00232256	0.0295119	0.0234916
GOBP_INTERLEUKIN_6_PRODUCTION	0.673541	1.47642	5.85e-05	0.00208646	0.00166084
GOBP_CHROMOSOME_LOCALIZATION	0.708135	1.47621	0.00100244	0.0168054	0.0133772
GOBP_ALPHA_BETA_T_CELL_ACTIVATION	0.676284	1.476	8.1e-05	0.00263065	0.00209401
GOBP_POSITIVE_REGULATION_OF_PROTEIN_LOCALIZATION_TO_MEMBRANE	0.691245	1.47569	0.000533364	0.0107856	0.00858538
GOBP_SPHINGOLIPID_BIOSYNTHETIC_PROCESS	0.690872	1.47489	0.000571803	0.0112063	0.0089203
GOBP_POSITIVE_REGULATION_OF_ADAPTIVE_IMMUNE_RESPONSE	0.689751	1.4746	0.000465701	0.0098384	0.00783142
GOBP_POSITIVE_REGULATION_OF_MACROPHAGE_CHEMOTAXIS	0.848739	1.47391	0.00386391	0.0414891	0.0330256
GOBP_RESPONSE_TO_THYROID_HORMONE	0.793064	1.4736	0.00455995	0.0464874	0.0370042
GOBP_REGULATION_OF_IMMUNE_EFFECTOR_PROCESS	0.65866	1.47331	1.58e-07	1.58e-05	1.25e-05
GOBP_REGULATION_OF_NATURAL_KILLER_CELL_ACTIVATION	0.758728	1.47307	0.00485263	0.0484052	0.0385308
GOBP_LEUKOCYTE_DEGRANULATION	0.708585	1.4726	0.0017167	0.023983	0.0190906
GOBP_CALCIUM_ION_TRANSPORT_INTO_CYTOSOL	0.672604	1.47156	4.18e-05	0.00159806	0.00127206
GOBP_NEGATIVE_REGULATION_OF_CELL_ADHESION	0.65746	1.47147	5.86e-07	4.62e-05	3.67e-05
GOBP_POSITIVE_REGULATION_OF_INTERLEUKIN_12_PRODUCTION	0.749983	1.47126	0.00464677	0.0470746	0.0374716
GOBP_POSITIVE_REGULATION_OF_ERBB_SIGNALING_PATHWAY	0.757779	1.47103	0.00416645	0.0440103	0.0350324
GOBP_CYTOSOLIC_CALCIUM_ION_TRANSPORT	0.669522	1.47059	3.02e-05	0.00125648	0.00100016
GOBP_NONRIBOSOMAL_PEPTIDE_BIOSYNTHETIC_PROCESS	0.84605	1.46924	0.00430132	0.0451165	0.035913
GOBP_PROTEIN_N_LINKED_GLYCOSYLATION	0.714171	1.46799	0.0013991	0.0209542	0.0166797
GOBP_T_CELL_APOPTOTIC_PROCESS	0.732226	1.46753	0.00441647	0.0456763	0.0363586
GOBP_DIOL_METABOLIC_PROCESS	0.78945	1.46688	0.00488491	0.0486339	0.0387129
GOBP_RESPONSE_TO_CHEMOKINE	0.689324	1.4668	0.000999977	0.0168054	0.0133772
GOBP_REGULATION_OF_CD4_POSITIVE_ALPHA_BETA_T_CELL_DIFFERENTIATION	0.731557	1.4662	0.00450222	0.0463215	0.0368722
GOBP_NEGATIVE_REGULATION_OF_INTERFERON_GAMMA_PRODUCTION	0.750465	1.4656	0.00302374	0.0356335	0.0283645
GOBP_REGULATION_OF_T_CELL_APOPTOTIC_PROCESS	0.763384	1.46544	0.00456197	0.0464874	0.0370042
GOBP_REGULATION_OF_ERBB_SIGNALING_PATHWAY	0.705031	1.46521	0.00206207	0.0271994	0.0216509
GOBP_ZINC_ION_HOMEOSTASIS	0.750231	1.46514	0.00306788	0.0358287	0.0285198
GOBP_POSITIVE_REGULATION_OF_INFLAMMATORY_RESPONSE	0.673025	1.46505	0.000259922	0.0065356	0.00520237
GOBP_POSITIVE_REGULATION_OF_T_CELL_MEDIATED_IMMUNITY	0.723391	1.4645	0.00289272	0.0344804	0.0274466
GOBP_GOLGI_VESICLE_TRANSPORT	0.654151	1.4634	6.55e-07	4.91e-05	3.91e-05
GOBP_REGULATION_OF_RELEASE_OF_SEQUESTERED_CALCIUM_ION_INTO_CYTOSOL	0.701736	1.46276	0.00122642	0.0191979	0.0152816
GOBP_MYELOID_LEUKOCYTE_ACTIVATION	0.659351	1.4626	1.94e-05	0.000934854	0.000744149
GOBP_POSITIVE_REGULATION_OF_T_CELL_MIGRATION	0.775965	1.46078	0.00333133	0.0377188	0.0300244
GOBP_ERBB_SIGNALING_PATHWAY	0.680545	1.46078	0.00028807	0.00712905	0.00567477
GOBP_EPITHELIAL_CELL_APOPTOTIC_PROCESS	0.679453	1.46066	0.000510931	0.0104953	0.0083543
GOBP_REGULATION_OF_INNATE_IMMUNE_RESPONSE	0.659112	1.46043	9.52e-06	0.000549792	0.000437637
GOBP_MAINTENANCE_OF_LOCATION_IN_CELL	0.660157	1.46009	2.4e-05	0.00106625	0.000848738
GOBP_LONG_CHAIN_FATTY_ACYL_COA_METABOLIC_PROCESS	0.808648	1.46003	0.00497857	0.0489104	0.038933
GOBP_PROTEIN_PROCESSING	0.658183	1.45984	1.11e-05	0.000605734	0.000482168
GOBP_REGULATION_OF_CALCIUM_ION_TRANSPORT	0.656992	1.45886	1.11e-05	0.000605734	0.000482168
GOBP_SISTER_CHROMATID_SEGREGATION	0.662492	1.4587	3.13e-05	0.00127154	0.00101215
GOBP_NADH_DEHYDROGENASE_COMPLEX_ASSEMBLY	0.723915	1.45857	0.00313244	0.036419	0.0289897
GOBP_TRANSITION_METAL_ION_TRANSPORT	0.683093	1.4585	0.00134381	0.0205405	0.0163504
GOBP_CELLULAR_TRANSITION_METAL_ION_HOMEOSTASIS	0.680958	1.45781	0.000647326	0.0120937	0.00962665
GOBP_REGULATION_OF_ALPHA_BETA_T_CELL_DIFFERENTIATION	0.707524	1.45678	0.00282822	0.0340238	0.0270831
GOBP_RESPONSE_TO_IONIZING_RADIATION	0.670166	1.45631	0.000496212	0.0103153	0.008211
GOBP_CELLULAR_RESPONSE_TO_INTERFERON_GAMMA	0.678897	1.45625	0.000772802	0.0136607	0.010874
GOBP_INFLAMMATORY_RESPONSE_TO_ANTIGENIC_STIMULUS	0.705527	1.45614	0.00191858	0.0259658	0.0206689
GOBP_REGULATION_OF_LEUKOCYTE_MEDIATED_IMMUNITY	0.65576	1.45463	3.1e-05	0.00126949	0.00101052
GOBP_MYELOID_LEUKOCYTE_DIFFERENTIATION	0.657426	1.45325	2.2e-05	0.00101357	0.000806804
GOBP_REGULATION_OF_CHEMOTAXIS	0.656419	1.45313	1.72e-05	0.00088345	0.000703231
GOBP_RESPONSE_TO_ISCHEMIA	0.724995	1.45309	0.00405072	0.0430502	0.0342682
GOBP_REGULATION_OF_CELL_KILLING	0.679673	1.45308	0.00141817	0.0210579	0.0167622
GOBP_NEGATIVE_REGULATION_OF_CALCIUM_ION_TRANSMEMBRANE_TRANSPORT	0.734109	1.45211	0.00494785	0.0487931	0.0388396
GOBP_REGULATION_OF_RECEPTOR_INTERNALIZATION	0.711395	1.45096	0.00257947	0.0317666	0.0252864
GOBP_CELLULAR_RESPONSE_TO_IONIZING_RADIATION	0.701518	1.4507	0.0019618	0.0263754	0.020995
GOBP_POSITIVE_REGULATION_OF_METALLOPEPTIDASE_ACTIVITY	0.913303	1.45027	0.0034245	0.0385219	0.0306636
GOBP_CELLULAR_RESPIRATION	0.655746	1.45008	6.02e-05	0.00211342	0.00168229
GOBP_REGULATION_OF_PHOSPHATIDYLINOSITOL_3_KINASE_ACTIVITY	0.719315	1.4493	0.00389956	0.0416996	0.0331931
GOBP_POSITIVE_REGULATION_OF_I_KAPPAB_KINASE_NF_KAPPAB_SIGNALING	0.657972	1.44914	0.000151226	0.00427131	0.00339999
GOBP_NEUTROPHIL_MIGRATION	0.670743	1.449	0.000489283	0.0102532	0.00816163
GOBP_SERINE_TRANSPORT	0.912399	1.44883	0.00367816	0.0403099	0.0320869
GOBP_POSITIVE_REGULATION_OF_CALCIUM_ION_TRANSMEMBRANE_TRANSPORT	0.705941	1.44881	0.00264241	0.0322299	0.0256552
GOBP_REGULATION_OF_T_CELL_MEDIATED_IMMUNITY	0.688604	1.44874	0.00251053	0.0312135	0.0248461
GOBP_L_AMINO_ACID_TRANSPORT	0.704276	1.44718	0.00382338	0.0412243	0.0328148
GOBP_NATURAL_KILLER_CELL_MEDIATED_IMMUNITY	0.698811	1.44682	0.00358868	0.0399265	0.0317817
GOBP_CALCIUM_ION_TRANSPORT	0.644646	1.44671	6.78e-08	7.66e-06	6.1e-06
GOBP_REGULATION_OF_CD4_POSITIVE_ALPHA_BETA_T_CELL_ACTIVATION	0.705543	1.44664	0.00438601	0.0455881	0.0362884
GOBP_POSITIVE_REGULATION_OF_INTERLEUKIN_1_BETA_PRODUCTION	0.709241	1.44656	0.00299889	0.035421	0.0281953
GOBP_POSITIVE_REGULATION_OF_ORGANIC_ACID_TRANSPORT	0.73339	1.4464	0.00471286	0.0475587	0.037857
GOBP_NEGATIVE_REGULATION_OF_ION_TRANSMEMBRANE_TRANSPORT	0.676478	1.44625	0.00172689	0.0240607	0.0191525
GOBP_POSITIVE_REGULATION_OF_PROTEIN_MODIFICATION_BY_SMALL_PROTEIN_CONJUGATION_OR_REMOVAL	0.667483	1.4459	0.000745793	0.0132736	0.0105658
GOBP_RESPONSE_TO_TOPOLOGICALLY_INCORRECT_PROTEIN	0.662938	1.44574	0.000294519	0.007193	0.00572567
GOBP_NEGATIVE_REGULATION_OF_DNA_REPLICATION	0.767851	1.44551	0.0049409	0.0487931	0.0388396
GOBP_T_CELL_DIFFERENTIATION_INVOLVED_IN_IMMUNE_RESPONSE	0.696229	1.44524	0.00206207	0.0271994	0.0216509
GOBP_RESPIRATORY_ELECTRON_TRANSPORT_CHAIN	0.676486	1.44486	0.000836533	0.01454	0.0115739
GOBP_ENDOPLASMIC_RETICULUM_UNFOLDED_PROTEIN_RESPONSE	0.698582	1.44463	0.0022502	0.0290181	0.0230986
GOBP_RECEPTOR_MEDIATED_ENDOCYTOSIS	0.649959	1.44444	1.71e-05	0.00088345	0.000703231
GOBP_CELLULAR_MONOVALENT_INORGANIC_CATION_HOMEOSTASIS	0.675773	1.44331	0.0016145	0.023051	0.0183487
GOBP_OSTEOCLAST_DIFFERENTIATION	0.678233	1.4432	0.00181547	0.0250931	0.0199743
GOBP_CELLULAR_AMINO_ACID_BIOSYNTHETIC_PROCESS	0.699048	1.44277	0.00253638	0.0314597	0.0250421
GOBP_REGULATION_OF_CELL_CYCLE_G2_M_PHASE_TRANSITION	0.675268	1.44158	0.00170938	0.0239452	0.0190605
GOBP_MODULATION_OF_PROCESS_OF_ANOTHER_ORGANISM	0.790994	1.44115	0.00436128	0.045422	0.0361562
GOBP_COLLAGEN_METABOLIC_PROCESS	0.675907	1.44082	0.00120973	0.0190454	0.0151602
GOBP_NEGATIVE_REGULATION_OF_T_CELL_RECEPTOR_SIGNALING_PATHWAY	0.790685	1.44058	0.00440894	0.0456763	0.0363586
GOBP_METENCEPHALON_DEVELOPMENT	0.675097	1.44055	0.0020813	0.0273836	0.0217975
GOBP_PEPTIDYL_PROLINE_MODIFICATION	0.714948	1.4405	0.00483966	0.0483707	0.0385034
GOBP_MYELOID_LEUKOCYTE_MIGRATION	0.650385	1.44032	8.08e-05	0.00263065	0.00209401
GOBP_NEGATIVE_REGULATION_OF_IMMUNE_RESPONSE	0.65562	1.44005	0.000126732	0.00376359	0.00299584
GOBP_REGULATION_OF_NK_T_CELL_ACTIVATION	0.906388	1.43929	0.00454061	0.0464519	0.036976
GOBP_RECEPTOR_METABOLIC_PROCESS	0.657358	1.4382	0.000187575	0.00496395	0.00395134
GOBP_REGULATION_OF_RECEPTOR_MEDIATED_ENDOCYTOSIS	0.67168	1.43795	0.00101193	0.01691	0.0134604
GOBP_NEGATIVE_REGULATION_OF_TRANSMEMBRANE_TRANSPORT	0.660951	1.43765	0.000740422	0.0132233	0.0105258
GOBP_ADP_METABOLIC_PROCESS	0.68098	1.43606	0.00245704	0.030694	0.0244326
GOBP_INTRINSIC_APOPTOTIC_SIGNALING_PATHWAY	0.642273	1.43606	1.1e-05	0.000605734	0.000482168
GOBP_DIVALENT_INORGANIC_CATION_HOMEOSTASIS	0.637999	1.43357	1.6e-08	2.13e-06	1.7e-06
GOBP_RESPONSE_TO_ESTRADIOL	0.665616	1.43313	0.00106308	0.0175391	0.0139613
GOBP_ENDOTHELIAL_CELL_PROLIFERATION	0.650957	1.43294	0.000170738	0.00465176	0.00370282
GOBP_NUCLEAR_CHROMOSOME_SEGREGATION	0.642207	1.4318	1.79e-05	0.000894154	0.000711752
GOBP_CHEMOKINE_PRODUCTION	0.671677	1.431	0.00150322	0.021868	0.017407
GOBP_TOLL_LIKE_RECEPTOR_SIGNALING_PATHWAY	0.663002	1.43076	0.00106198	0.0175391	0.0139613
GOBP_REGULATION_OF_DEFENSE_RESPONSE_TO_VIRUS	0.694684	1.43034	0.00493754	0.0487931	0.0388396
GOBP_TOR_SIGNALING	0.666442	1.43032	0.000560431	0.0111166	0.00884891
GOBP_PATTERN_RECOGNITION_RECEPTOR_SIGNALING_PATHWAY	0.652169	1.42966	0.000414042	0.00900325	0.00716664
GOBP_NEGATIVE_REGULATION_OF_INTRACELLULAR_TRANSPORT	0.700529	1.42879	0.00451004	0.0463215	0.0368722
GOBP_REGULATION_OF_TOR_SIGNALING	0.671411	1.42833	0.00205535	0.0271994	0.0216509
GOBP_GLYCOLIPID_BIOSYNTHETIC_PROCESS	0.695628	1.42765	0.00472547	0.0475745	0.0378696
GOBP_INTERFERON_GAMMA_PRODUCTION	0.665407	1.42732	0.00203598	0.0271308	0.0215963
GOBP_RESPONSE_TO_TEMPERATURE_STIMULUS	0.650667	1.42694	0.000522412	0.010647	0.00847504
GOBP_REGULATION_OF_PROTEIN_LOCALIZATION_TO_PLASMA_MEMBRANE	0.667278	1.42658	0.00312181	0.0363768	0.0289562
GOBP_REGULATION_OF_CHROMOSOME_SEGREGATION	0.67755	1.42616	0.00431459	0.0451165	0.035913
GOBP_POSITIVE_REGULATION_OF_INTERLEUKIN_6_PRODUCTION	0.669946	1.42557	0.00318058	0.0366507	0.0291741
GOBP_POSITIVE_REGULATION_OF_CELL_ADHESION	0.634108	1.42504	1.78e-07	1.72e-05	1.37e-05
GOBP_REGULATION_OF_MYELOID_LEUKOCYTE_DIFFERENTIATION	0.663894	1.42485	0.000656229	0.0120937	0.00962665
GOBP_TRANSITION_METAL_ION_HOMEOSTASIS	0.655236	1.42387	0.00141524	0.0210579	0.0167622
GOBP_REGULATION_OF_PROTEIN_LOCALIZATION_TO_MEMBRANE	0.648419	1.42324	0.000454749	0.00970572	0.00772581
GOBP_POSITIVE_REGULATION_OF_ERK1_AND_ERK2_CASCADE	0.643395	1.42302	0.000118783	0.00354778	0.00282405
GOBP_REGULATION_OF_CELLULAR_PH	0.681026	1.42142	0.00509559	0.0494987	0.0394013
GOBP_INTERLEUKIN_1_PRODUCTION	0.658139	1.42131	0.000909185	0.0154991	0.0123374
GOBP_PROTON_TRANSMEMBRANE_TRANSPORT	0.656059	1.42115	0.00157533	0.022616	0.0180025
GOBP_REGULATION_OF_CYTOSOLIC_CALCIUM_ION_CONCENTRATION	0.635036	1.42069	7.88e-06	0.000473131	0.000376615
GOBP_POSITIVE_REGULATION_OF_MITOTIC_CELL_CYCLE	0.656891	1.42037	0.00115645	0.0185657	0.0147784
GOBP_NEGATIVE_REGULATION_OF_PEPTIDASE_ACTIVITY	0.638635	1.41975	7.11e-05	0.00238539	0.00189878
GOBP_PROTEIN_MATURATION	0.634737	1.41969	1.25e-05	0.000676557	0.000538543
GOBP_CD4_POSITIVE_ALPHA_BETA_T_CELL_ACTIVATION	0.664947	1.41954	0.00324155	0.0369035	0.0293754
GOBP_MITOCHONDRIAL_GENE_EXPRESSION	0.666261	1.41899	0.0027513	0.0333299	0.0265308
GOBP_REGULATION_OF_RECEPTOR_SIGNALING_PATHWAY_VIA_STAT	0.661043	1.41873	0.000790347	0.0139235	0.0110832
GOBP_CALCIUM_MEDIATED_SIGNALING	0.643445	1.41845	0.000200321	0.0052315	0.00416431
GOBP_POST_GOLGI_VESICLE_MEDIATED_TRANSPORT	0.66388	1.41727	0.00339683	0.0383599	0.0305347
GOBP_ISOPRENOID_METABOLIC_PROCESS	0.660748	1.41678	0.00132032	0.0203009	0.0161596
GOBP_REGULATION_OF_INTRINSIC_APOPTOTIC_SIGNALING_PATHWAY	0.647137	1.41563	0.000673013	0.0122725	0.00976895
GOBP_POSITIVE_REGULATION_OF_ENDOTHELIAL_CELL_PROLIFERATION	0.662624	1.41525	0.00150639	0.021868	0.017407
GOBP_NIK_NF_KAPPAB_SIGNALING	0.649924	1.41516	0.00126197	0.0196361	0.0156304
GOBP_DEFENSE_RESPONSE_TO_GRAM_POSITIVE_BACTERIUM	0.663478	1.41432	0.00227581	0.0290905	0.0231562
GOBP_RESPONSE_TO_CALCIUM_ION	0.64894	1.41385	0.00105323	0.0174876	0.0139202
GOBP_REGULATION_OF_LYMPHOCYTE_MEDIATED_IMMUNITY	0.644881	1.4136	0.000597099	0.0115358	0.00918255
GOBP_RECEPTOR_SIGNALING_PATHWAY_VIA_STAT	0.642193	1.4136	0.000336428	0.00794734	0.00632613
GOBP_HINDBRAIN_DEVELOPMENT	0.648679	1.4135	0.00179702	0.0249043	0.0198239
GOBP_MITOTIC_NUCLEAR_DIVISION	0.631946	1.41323	4.15e-05	0.00159765	0.00127174
GOBP_REGULATION_OF_ENDOCYTOSIS	0.63864	1.41172	0.000188166	0.00496395	0.00395134
GOBP_ALPHA_BETA_T_CELL_DIFFERENTIATION	0.658232	1.40914	0.00242632	0.0305126	0.0242882
GOBP_ESTABLISHMENT_OF_PROTEIN_LOCALIZATION_TO_MEMBRANE	0.634254	1.40868	8.51e-05	0.0027114	0.00215829
GOBP_REGULATION_OF_PEPTIDASE_ACTIVITY	0.626567	1.40756	2.09e-06	0.000144479	0.000115006
GOBP_CELL_RECOGNITION	0.636297	1.40741	0.000220265	0.00561135	0.00446666
GOBP_INORGANIC_ANION_TRANSMEMBRANE_TRANSPORT	0.662691	1.40692	0.00507521	0.049393	0.0393171
GOBP_NEGATIVE_REGULATION_OF_MITOTIC_CELL_CYCLE_PHASE_TRANSITION	0.640397	1.40626	0.000766353	0.013593	0.0108201
GOBP_JNK_CASCADE	0.641166	1.40623	0.000973311	0.016423	0.0130728
GOBP_REGULATION_OF_MITOTIC_NUCLEAR_DIVISION	0.656711	1.40588	0.00273688	0.0332327	0.0264534
GOBP_AEROBIC_RESPIRATION	0.640542	1.40567	0.000681028	0.0123752	0.00985071
GOBP_RESPONSE_TO_METAL_ION	0.62825	1.4055	1.78e-05	0.000894154	0.000711752
GOBP_POSITIVE_REGULATION_OF_ORGANELLE_ASSEMBLY	0.676429	1.40414	0.00496517	0.0488712	0.0389017
GOBP_PHOSPHATIDYLINOSITOL_BIOSYNTHETIC_PROCESS	0.647864	1.4034	0.00278244	0.0336287	0.0267686
GOBP_VITAMIN_METABOLIC_PROCESS	0.655551	1.40156	0.0022782	0.0290905	0.0231562
GOBP_PROTEIN_FOLDING	0.634935	1.40116	0.000397561	0.00879201	0.00699849
GOBP_ATP_METABOLIC_PROCESS	0.629656	1.39893	8.73e-05	0.00275107	0.00218987
GOBP_STRESS_ACTIVATED_PROTEIN_KINASE_SIGNALING_CASCADE	0.629293	1.39835	0.000154898	0.00435138	0.00346372
GOBP_ACUTE_INFLAMMATORY_RESPONSE	0.652154	1.39686	0.00362595	0.0401525	0.0319616
GOBP_PHOSPHOLIPID_BIOSYNTHETIC_PROCESS	0.627852	1.39514	0.000170961	0.00465176	0.00370282
GOBP_OXIDATIVE_PHOSPHORYLATION	0.647778	1.39405	0.0041483	0.0439077	0.0349508
GOBP_POSITIVE_REGULATION_OF_GROWTH	0.627445	1.39392	0.00010447	0.00321261	0.00255726
GOBP_NEGATIVE_REGULATION_OF_IMMUNE_EFFECTOR_PROCESS	0.650572	1.39347	0.00389741	0.0416996	0.0331931
GOBP_RESPONSE_TO_KETONE	0.632043	1.39221	0.000949543	0.0160742	0.0127951
GOBP_CHROMOSOME_SEGREGATION	0.621958	1.39148	4.6e-05	0.00171884	0.0013682
GOBP_MITOCHONDRION_ORGANIZATION	0.619187	1.39109	1.7e-07	1.67e-05	1.33e-05
GOBP_HEMATOPOIETIC_PROGENITOR_CELL_DIFFERENTIATION	0.646695	1.39024	0.00391569	0.0417861	0.033262
GOBP_REGULATION_OF_REGULATED_SECRETORY_PATHWAY	0.639344	1.39003	0.0026481	0.0322299	0.0256552
GOBP_DNA_DEPENDENT_DNA_REPLICATION	0.635916	1.38797	0.00170194	0.0239145	0.0190361
GOBP_EXOCYTOSIS	0.620125	1.38743	2.29e-05	0.00104169	0.000829193
GOBP_NEGATIVE_REGULATION_OF_RESPONSE_TO_BIOTIC_STIMULUS	0.648838	1.38581	0.003223	0.0368941	0.0293679
GOBP_POSITIVE_REGULATION_OF_CELL_GROWTH	0.635305	1.38548	0.00193212	0.0260812	0.0207607
GOBP_NEGATIVE_REGULATION_OF_ION_TRANSPORT	0.635285	1.3854	0.00212342	0.027797	0.0221265
GOBP_CELLULAR_RESPONSE_TO_REACTIVE_OXYGEN_SPECIES	0.635526	1.38463	0.00226942	0.0290905	0.0231562
GOBP_POSITIVE_REGULATION_OF_ION_TRANSPORT	0.620953	1.38405	0.000186459	0.00496395	0.00395134
GOBP_RESPONSE_TO_ENDOPLASMIC_RETICULUM_STRESS	0.622688	1.38336	0.000148014	0.00426829	0.00339758
GOBP_NEURON_DEATH	0.617909	1.38237	6.4e-05	0.00217363	0.00173022
GOBP_PHOSPHATIDYLINOSITOL_METABOLIC_PROCESS	0.633278	1.38207	0.00137725	0.0209285	0.0166592
GOBP_VIRAL_PROCESS	0.615296	1.38077	6e-06	0.000384807	0.000306309
GOBP_ANION_TRANSMEMBRANE_TRANSPORT	0.621486	1.38069	0.000164077	0.00454853	0.00362065
GOBP_MEMBRANE_LIPID_METABOLIC_PROCESS	0.626711	1.37936	0.000662241	0.0121614	0.00968052
GOBP_PROTEIN_CONTAINING_COMPLEX_LOCALIZATION	0.632785	1.37887	0.00434022	0.0452934	0.0360538
GOBP_ESTABLISHMENT_OF_ORGANELLE_LOCALIZATION	0.614259	1.37838	8.29e-06	0.000489687	0.000389794
GOBP_FORMATION_OF_PRIMARY_GERM_LAYER	0.640145	1.37829	0.00429442	0.0451165	0.035913
GOBP_NEGATIVE_REGULATION_OF_DEFENSE_RESPONSE	0.619443	1.37825	0.000296291	0.00719544	0.00572761
GOBP_NEGATIVE_REGULATION_OF_HYDROLASE_ACTIVITY	0.615341	1.37763	3.18e-05	0.00127154	0.00101215
GOBP_REGULATION_OF_INFLAMMATORY_RESPONSE	0.614221	1.37716	2.06e-05	0.000981551	0.00078132
GOBP_POSITIVE_REGULATION_OF_CELL_CYCLE	0.614849	1.37551	6.18e-05	0.00214077	0.00170406
GOBP_MITOTIC_CELL_CYCLE_PHASE_TRANSITION	0.612065	1.3752	5.02e-06	0.000330361	0.00026297
GOBP_PROTEIN_AUTOPHOSPHORYLATION	0.620622	1.37515	0.000455685	0.00970572	0.00772581
GOBP_INOSITOL_LIPID_MEDIATED_SIGNALING	0.626046	1.37489	0.00127569	0.0197314	0.0157063
GOBP_CELLULAR_RESPONSE_TO_INORGANIC_SUBSTANCE	0.620756	1.37414	0.000646226	0.0120937	0.00962665
GOBP_REGULATION_OF_MYELOID_CELL_DIFFERENTIATION	0.624108	1.37384	0.00117878	0.0187918	0.0149584
GOBP_MAINTENANCE_OF_LOCATION	0.612929	1.37122	6.75e-05	0.00227646	0.00181207
GOBP_NEGATIVE_REGULATION_OF_CYTOKINE_PRODUCTION	0.610767	1.36751	5.94e-05	0.00210008	0.00167168
GOBP_MYELOID_CELL_DIFFERENTIATION	0.610044	1.36745	4.53e-05	0.00170662	0.00135848
GOBP_POSITIVE_REGULATION_OF_DEVELOPMENTAL_GROWTH	0.622745	1.36662	0.00229574	0.0292425	0.0232772
GOBP_GENERATION_OF_PRECURSOR_METABOLITES_AND_ENERGY	0.608171	1.36612	9.95e-06	0.000568476	0.000452511
GOBP_ERK1_AND_ERK2_CASCADE	0.610931	1.36582	0.000133302	0.00392206	0.00312199
GOBP_REGULATION_OF_CATION_TRANSMEMBRANE_TRANSPORT	0.610446	1.36513	0.000106003	0.00324058	0.00257952
GOBP_IMPORT_INTO_CELL	0.615818	1.36438	0.000516578	0.0105695	0.00841339
GOBP_ORGANELLE_FISSION	0.60695	1.36409	1.41e-05	0.000741041	0.000589873
GOBP_REGULATION_OF_JNK_CASCADE	0.626502	1.36378	0.00500573	0.0490845	0.0390715
GOBP_RECOMBINATIONAL_REPAIR	0.625312	1.36365	0.00384507	0.0413723	0.0329326
GOBP_I_KAPPAB_KINASE_NF_KAPPAB_SIGNALING	0.609144	1.36223	0.000355292	0.00831735	0.00662066
GOBP_CELLULAR_RESPONSE_TO_RADIATION	0.618604	1.35894	0.00259664	0.0319024	0.0253945
GOBP_SIGNAL_TRANSDUCTION_IN_RESPONSE_TO_DNA_DAMAGE	0.620819	1.35806	0.00363127	0.0401525	0.0319616
GOBP_POSITIVE_REGULATION_OF_ION_TRANSMEMBRANE_TRANSPORT	0.622246	1.358	0.0025772	0.0317666	0.0252864
GOBP_REGULATION_OF_CHROMOSOME_ORGANIZATION	0.6154	1.35784	0.00205753	0.0271994	0.0216509
GOBP_CELL_CYCLE_CHECKPOINT_SIGNALING	0.619798	1.35622	0.00492425	0.0487931	0.0388396
GOBP_RESPONSE_TO_RADIATION	0.603695	1.35602	2.45e-05	0.00107422	0.000855083
GOBP_SPHINGOLIPID_METABOLIC_PROCESS	0.621384	1.35446	0.00369203	0.0403099	0.0320869
GOBP_SPINDLE_ORGANIZATION	0.614352	1.35431	0.00190846	0.0258963	0.0206136
GOBP_REGULATION_OF_STRESS_ACTIVATED_PROTEIN_KINASE_SIGNALING_CASCADE	0.614306	1.35421	0.00190846	0.0258963	0.0206136
GOBP_NEGATIVE_REGULATION_OF_DNA_BINDING_TRANSCRIPTION_FACTOR_ACTIVITY	0.615694	1.35325	0.00371861	0.0404302	0.0321827
GOBP_POSITIVE_REGULATION_OF_KINASE_ACTIVITY	0.602087	1.35316	1.94e-05	0.000934854	0.000744149
GOBP_POSITIVE_REGULATION_OF_ORGANELLE_ORGANIZATION	0.602288	1.3531	9.12e-06	0.000532476	0.000423854
GOBP_REGULATION_OF_MITOTIC_CELL_CYCLE_PHASE_TRANSITION	0.604521	1.35226	0.000332036	0.00787942	0.00627207
GOBP_REGULATION_OF_RESPONSE_TO_CYTOKINE_STIMULUS	0.616464	1.35205	0.00431351	0.0451165	0.035913
GOBP_RESPONSE_TO_CORTICOSTEROID	0.618907	1.35067	0.00280917	0.033873	0.0269631
GOBP_REGULATION_OF_INTRACELLULAR_TRANSPORT	0.60259	1.3487	0.000290819	0.00716297	0.00570176
GOBP_REGULATION_OF_CELL_PROJECTION_ASSEMBLY	0.609567	1.34862	0.00173217	0.0240698	0.0191597
GOBP_POSITIVE_REGULATION_OF_PROTEIN_SERINE_THREONINE_KINASE_ACTIVITY	0.609681	1.34822	0.00295154	0.0350208	0.0278768
GOBP_CELLULAR_RESPONSE_TO_ABIOTIC_STIMULUS	0.602583	1.34816	0.000396153	0.00879201	0.00699849
GOBP_REGULATED_EXOCYTOSIS	0.607684	1.34736	0.00208677	0.0273862	0.0217996
GOBP_REGULATION_OF_EXOCYTOSIS	0.611483	1.34639	0.00240711	0.0303634	0.0241695
GOBP_RESPONSE_TO_ALCOHOL	0.606455	1.34508	0.00159784	0.022876	0.0182094
GOBP_HEMOSTASIS	0.606402	1.3449	0.00146703	0.0214281	0.0170569
GOBP_VIRAL_LIFE_CYCLE	0.600275	1.34214	0.000464849	0.0098384	0.00783142
GOBP_POSITIVE_REGULATION_OF_PROTEIN_KINASE_ACTIVITY	0.598027	1.34207	0.000178337	0.00480216	0.00382255
GOBP_NEGATIVE_REGULATION_OF_CELL_CYCLE_PROCESS	0.600022	1.34168	0.000621953	0.0117967	0.00939023
GOBP_AMIDE_TRANSPORT	0.60015	1.34159	0.00115745	0.0185657	0.0147784
GOBP_POSITIVE_REGULATION_OF_MAPK_CASCADE	0.597	1.34157	3.17e-05	0.00127154	0.00101215
GOBP_REGULATION_OF_PROTEIN_MODIFICATION_BY_SMALL_PROTEIN_CONJUGATION_OR_REMOVAL	0.605019	1.34149	0.00223489	0.0289217	0.0230219
GOBP_PROTEIN_LOCALIZATION_TO_PLASMA_MEMBRANE	0.601077	1.34123	0.000558578	0.0111166	0.00884891
GOBP_DEVELOPMENT_OF_PRIMARY_SEXUAL_CHARACTERISTICS	0.604515	1.34096	0.00287051	0.0343734	0.0273614
GOBP_PROTEASOMAL_PROTEIN_CATABOLIC_PROCESS	0.596175	1.3401	3.51e-05	0.00139303	0.00110886
GOBP_RESPONSE_TO_OXYGEN_LEVELS	0.598864	1.33961	0.000621329	0.0117967	0.00939023
GOBP_POSITIVE_REGULATION_OF_VASCULATURE_DEVELOPMENT	0.608893	1.33914	0.00379411	0.0410792	0.0326993
GOBP_VESICLE_ORGANIZATION	0.597999	1.33903	0.00236119	0.0299295	0.0238241
GOBP_NEURON_APOPTOTIC_PROCESS	0.603254	1.33888	0.00185759	0.025405	0.0202225
GOBP_CELLULAR_RESPONSE_TO_EXTERNAL_STIMULUS	0.598301	1.33847	0.000869856	0.0150187	0.011955
GOBP_ESTABLISHMENT_OF_PROTEIN_LOCALIZATION_TO_ORGANELLE	0.595998	1.33819	0.000103528	0.00320259	0.00254928
GOBP_REGULATION_OF_CYSTEINE_TYPE_ENDOPEPTIDASE_ACTIVITY	0.602926	1.33743	0.00343335	0.038538	0.0306765
GOBP_VESICLE_MEDIATED_TRANSPORT_IN_SYNAPSE	0.607553	1.33731	0.00506655	0.049393	0.0393171
GOBP_GLYCEROPHOSPHOLIPID_BIOSYNTHETIC_PROCESS	0.604732	1.33572	0.00367337	0.0403099	0.0320869
GOBP_SECOND_MESSENGER_MEDIATED_SIGNALING	0.596421	1.33512	0.00125005	0.019509	0.0155293
GOBP_BIOLOGICAL_PROCESS_INVOLVED_IN_SYMBIOTIC_INTERACTION	0.597299	1.33469	0.00117597	0.0187918	0.0149584
GOBP_POSITIVE_REGULATION_OF_PROTEIN_LOCALIZATION	0.593767	1.33437	0.000150925	0.00427131	0.00339999
GOBP_DNA_REPAIR	0.5935	1.33315	2.14e-05	0.0010012	0.000796961
GOBP_DOUBLE_STRAND_BREAK_REPAIR	0.60008	1.33313	0.00110858	0.0181173	0.0144215
GOBP_PROTEIN_LOCALIZATION_TO_CELL_PERIPHERY	0.595862	1.33271	0.00058451	0.0113771	0.00905628
GOBP_PEPTIDYL_TYROSINE_MODIFICATION	0.594763	1.33254	0.000395359	0.00879201	0.00699849
GOBP_RESPONSE_TO_TOXIC_SUBSTANCE	0.600445	1.33178	0.00215977	0.0282019	0.0224488
GOBP_RESPONSE_TO_MOLECULE_OF_BACTERIAL_ORIGIN	0.595069	1.33137	0.000409481	0.00900325	0.00716664
GOBP_REGULATION_OF_ORGANELLE_ASSEMBLY	0.601299	1.33124	0.00340272	0.0383599	0.0305347
GOBP_IN_UTERO_EMBRYONIC_DEVELOPMENT	0.593754	1.33102	0.000210353	0.00543882	0.00432933
GOBP_NEGATIVE_REGULATION_OF_CELL_CYCLE_PHASE_TRANSITION	0.598892	1.33058	0.00138805	0.0209441	0.0166716
GOBP_REGENERATION	0.604932	1.32976	0.00512177	0.0496601	0.0395297
GOBP_LIPID_MODIFICATION	0.602641	1.32969	0.00504589	0.0492923	0.0392369
GOBP_POSITIVE_REGULATION_OF_PROTEOLYSIS	0.593889	1.32934	0.000372506	0.00845378	0.00672925
GOBP_PROTEIN_LOCALIZATION_TO_NUCLEUS	0.594224	1.32831	0.00143524	0.0211902	0.0168675
GOBP_POSITIVE_REGULATION_OF_CELL_CYCLE_PROCESS	0.598008	1.32818	0.00200546	0.0267928	0.0213272
GOBP_PROTEIN_KINASE_B_SIGNALING	0.60079	1.32805	0.00374872	0.0406724	0.0323755
GOBP_CELLULAR_RESPONSE_TO_EXTRACELLULAR_STIMULUS	0.598042	1.32656	0.00306122	0.0358287	0.0285198
GOBP_POSITIVE_REGULATION_OF_TRANSMEMBRANE_TRANSPORT	0.600334	1.32601	0.00473273	0.0475745	0.0378696
GOBP_OSTEOBLAST_DIFFERENTIATION	0.597633	1.32538	0.00354592	0.0395453	0.0314783
GOBP_NEGATIVE_REGULATION_OF_TRANSPORT	0.590029	1.32534	0.000178337	0.00480216	0.00382255
GOBP_PEPTIDYL_SERINE_MODIFICATION	0.592246	1.3245	0.000648943	0.0120937	0.00962665
GOBP_CELLULAR_RESPONSE_TO_CHEMICAL_STRESS	0.592048	1.32418	0.000906675	0.0154991	0.0123374
GOBP_REGULATION_OF_CELL_CYCLE_PHASE_TRANSITION	0.590087	1.32414	0.000294807	0.007193	0.00572567
GOBP_PROTEIN_POLYUBIQUITINATION	0.596498	1.32368	0.00350839	0.039211	0.0312122
GOBP_CELLULAR_RESPONSE_TO_BIOTIC_STIMULUS	0.594829	1.32278	0.00315789	0.0364701	0.0290304
GOBP_REGULATION_OF_METAL_ION_TRANSPORT	0.58912	1.32197	0.000208078	0.00540692	0.00430394
GOBP_DNA_RECOMBINATION	0.591377	1.32194	0.0016945	0.0239145	0.0190361
GOBP_EXTRINSIC_APOPTOTIC_SIGNALING_PATHWAY	0.596995	1.32171	0.00442085	0.0456763	0.0363586
GOBP_NEGATIVE_REGULATION_OF_RESPONSE_TO_EXTERNAL_STIMULUS	0.588153	1.32146	0.000228545	0.00579389	0.00461197
GOBP_FOREBRAIN_DEVELOPMENT	0.589751	1.32133	0.000394963	0.00879201	0.00699849
GOBP_REGULATION_OF_BINDING	0.589918	1.32113	0.00113551	0.0184414	0.0146795
GOBP_POSITIVE_REGULATION_OF_GTPASE_ACTIVITY	0.592115	1.31939	0.00364004	0.0401641	0.0319709
GOBP_REGULATION_OF_ION_TRANSMEMBRANE_TRANSPORT	0.586539	1.31865	0.000164542	0.00454853	0.00362065
GOBP_CELLULAR_RESPONSE_TO_MOLECULE_OF_BACTERIAL_ORIGIN	0.595036	1.31833	0.00223716	0.0289217	0.0230219
GOBP_RESPONSE_TO_OXIDATIVE_STRESS	0.586441	1.31833	0.000362638	0.00833908	0.00663795
GOBP_RESPONSE_TO_REACTIVE_OXYGEN_SPECIES	0.597875	1.31799	0.00444341	0.0458182	0.0364716
GOBP_AGING	0.589015	1.31774	0.00121179	0.0190454	0.0151602
GOBP_REGULATION_OF_MITOTIC_CELL_CYCLE	0.585292	1.31592	0.000148655	0.00426829	0.00339758
GOBP_DNA_REPLICATION	0.589403	1.3157	0.00359546	0.0399265	0.0317817
GOBP_REGULATION_OF_PEPTIDYL_TYROSINE_PHOSPHORYLATION	0.59136	1.31518	0.00315153	0.0364701	0.0290304
GOBP_HOMEOSTASIS_OF_NUMBER_OF_CELLS	0.588721	1.31459	0.00182597	0.0251713	0.0200365
GOBP_REGULATION_OF_MRNA_METABOLIC_PROCESS	0.588391	1.31429	0.00152937	0.0220782	0.0175743
GOBP_DENDRITE_DEVELOPMENT	0.591798	1.31244	0.00463814	0.0470746	0.0374716
GOBP_TELENCEPHALON_DEVELOPMENT	0.59086	1.31203	0.00290215	0.0345137	0.0274731
GOBP_ENERGY_DERIVATION_BY_OXIDATION_OF_ORGANIC_COMPOUNDS	0.585974	1.31088	0.00121301	0.0190454	0.0151602
GOBP_DNA_CONFORMATION_CHANGE	0.587527	1.3103	0.00345338	0.0386793	0.0307889
GOBP_REGULATION_OF_GTPASE_ACTIVITY	0.584825	1.31004	0.000793827	0.0139366	0.0110936
GOBP_REPRODUCTIVE_SYSTEM_DEVELOPMENT	0.579913	1.3032	0.000380884	0.00860632	0.00685068
GOBP_CARBOXYLIC_ACID_TRANSPORT	0.583201	1.3024	0.00453059	0.0464408	0.0369671
GOBP_REGULATION_OF_TRANS_SYNAPTIC_SIGNALING	0.579412	1.30178	0.000573578	0.0112063	0.0089203
GOBP_REGULATION_OF_PROTEIN_SERINE_THREONINE_KINASE_ACTIVITY	0.58039	1.3007	0.00115398	0.0185657	0.0147784
GOBP_POSITIVE_REGULATION_OF_CELLULAR_COMPONENT_BIOGENESIS	0.578425	1.29998	0.000412814	0.00900325	0.00716664
GOBP_PURINE_CONTAINING_COMPOUND_METABOLIC_PROCESS	0.579845	1.29895	0.001394	0.0209441	0.0166716
GOBP_NEGATIVE_REGULATION_OF_PHOSPHORUS_METABOLIC_PROCESS	0.577381	1.29745	0.000573578	0.0112063	0.0089203
GOBP_PROTEIN_POLYMERIZATION	0.583115	1.2974	0.00401044	0.0427095	0.033997
GOBP_MRNA_PROCESSING	0.575737	1.2941	0.000285094	0.00708916	0.00564301
GOBP_REGULATION_OF_DNA_BINDING_TRANSCRIPTION_FACTOR_ACTIVITY	0.575789	1.29393	0.000867244	0.0150187	0.011955
GOBP_ORGANIC_ANION_TRANSPORT	0.577892	1.29387	0.00217091	0.0282763	0.0225081
GOBP_WOUND_HEALING	0.575431	1.29307	0.000665348	0.0121754	0.00969169
GOBP_RNA_SPLICING	0.5747	1.2912	0.000885598	0.0152399	0.0121311
GOBP_SEX_DIFFERENTIATION	0.578226	1.2911	0.00490501	0.0487406	0.0387978
GOBP_RHYTHMIC_PROCESS	0.575528	1.28793	0.00460085	0.0467918	0.0372465
GOBP_POSITIVE_REGULATION_OF_CATABOLIC_PROCESS	0.572897	1.28713	0.000412814	0.00900325	0.00716664
GOBP_NEGATIVE_REGULATION_OF_PROTEOLYSIS	0.575103	1.28611	0.00284457	0.0341414	0.0271768
GOBP_ENDOTHELIAL_CELL_MIGRATION	0.576612	1.28552	0.00483987	0.0483707	0.0385034
GOBP_NUCLEAR_TRANSPORT	0.574503	1.28526	0.0047457	0.0476127	0.0379
GOBP_REGULATION_OF_VASCULATURE_DEVELOPMENT	0.5744	1.28461	0.00239837	0.0303268	0.0241403
GOBP_NEGATIVE_REGULATION_OF_PHOSPHORYLATION	0.572121	1.28172	0.00141105	0.0210579	0.0167622
GOBP_NEGATIVE_REGULATION_OF_CELL_CYCLE	0.571529	1.28084	0.00243067	0.0305126	0.0242882
GOBP_REGULATION_OF_APOPTOTIC_SIGNALING_PATHWAY	0.57159	1.28016	0.00328089	0.0372288	0.0296343
GOBP_PROTEASOME_MEDIATED_UBIQUITIN_DEPENDENT_PROTEIN_CATABOLIC_PROCESS	0.570501	1.28005	0.00146785	0.0214281	0.0170569
GOBP_REGULATION_OF_AUTOPHAGY	0.572294	1.27988	0.00306767	0.0358287	0.0285198
GOBP_RIBOSE_PHOSPHATE_METABOLIC_PROCESS	0.571428	1.27907	0.00220802	0.0286877	0.0228356
GOBP_RNA_SPLICING_VIA_TRANSESTERIFICATION_REACTIONS	0.571786	1.27884	0.00369979	0.0403099	0.0320869
GOBP_CELLULAR_COMPONENT_DISASSEMBLY	0.566878	1.27395	0.00166927	0.0236382	0.0188161
GOBP_REGULATION_OF_ACTIN_FILAMENT_BASED_PROCESS	0.567548	1.2714	0.00369238	0.0403099	0.0320869
GOBP_SMALL_GTPASE_MEDIATED_SIGNAL_TRANSDUCTION	0.563358	1.26552	0.00118852	0.0188891	0.0150358
GOBP_NON_MEMBRANE_BOUNDED_ORGANELLE_ASSEMBLY	0.563332	1.26294	0.00320996	0.036826	0.0293137
GOBP_RESPONSE_TO_EXTRACELLULAR_STIMULUS	0.561924	1.26289	0.00246285	0.030694	0.0244326
GOBP_OSSIFICATION	0.561579	1.26001	0.00320996	0.036826	0.0293137
GOBP_REGULATION_OF_PROTEIN_CONTAINING_COMPLEX_ASSEMBLY	0.561069	1.25731	0.00413951	0.0439042	0.034948
GOBP_ORGANIC_ACID_TRANSPORT	0.561551	1.25676	0.00504463	0.0492923	0.0392369
GOBP_REGULATION_OF_ANATOMICAL_STRUCTURE_SIZE	0.557549	1.25347	0.00190733	0.0258963	0.0206136
GOBP_LIPID_LOCALIZATION	0.556489	1.24995	0.00365527	0.0402467	0.0320366
GOBP_RESPONSE_TO_PEPTIDE	0.554572	1.24593	0.00164918	0.0234174	0.0186404
GOBP_EPITHELIAL_CELL_PROLIFERATION	0.551188	1.23882	0.00465694	0.0470858	0.0374806
GOBP_NEGATIVE_REGULATION_OF_STEM_CELL_PROLIFERATION	-0.949256	-1.65344	0.00261257	0.0320224	0.02549
GOBP_CYTOPLASMIC_TRANSLATION	-0.605755	-1.75974	5.16e-07	4.26e-05	3.39e-05
GOBP_NEGATIVE_REGULATION_OF_OSTEOCLAST_DIFFERENTIATION	0.0412803	0.0318727
GOBP_DEFENSE_RESPONSE_TO_TUMOR_CELL	0.0232004	0.0179132
GOBP_POSITIVE_REGULATION_OF_NITRIC_OXIDE_METABOLIC_PROCESS	0.032454	0.0250579
GOBP_ACTIVATION_OF_CYSTEINE_TYPE_ENDOPEPTIDASE_ACTIVITY_INVOLVED_IN_APOPTOTIC_PROCESS	0.041329	0.0319104
GOBP_REGULATION_OF_BONE_RESORPTION	0.0333473	0.0257476
GOBP_RENAL_SYSTEM_PROCESS	0.0244859	0.0189057
GOBP_NEGATIVE_REGULATION_OF_LEUKOCYTE_CHEMOTAXIS	0.0338667	0.0261487
GOBP_RESPONSE_TO_ALCOHOL	0.00234702	0.00181215
GOBP_INOSITOL_LIPID_MEDIATED_SIGNALING	0.00570531	0.0044051
GOBP_CYTIDINE_TO_URIDINE_EDITING	0.0152712	0.011791
GOBP_REGULATION_OF_DENDRITIC_CELL_ANTIGEN_PROCESSING_AND_PRESENTATION	0.0263007	0.0203069
GOBP_POSITIVE_REGULATION_OF_T_HELPER_17_TYPE_IMMUNE_RESPONSE	0.0326284	0.0251925
GOBP_NEGATIVE_REGULATION_OF_INFLAMMATORY_RESPONSE_TO_ANTIGENIC_STIMULUS	0.0453805	0.0350386
GOBP_POSITIVE_REGULATION_OF_ION_TRANSPORT	0.00416685	0.00321725
GOBP_POSITIVE_REGULATION_OF_MHC_CLASS_II_BIOSYNTHETIC_PROCESS	0.0303609	0.0234418
GOBP_ESTABLISHMENT_OF_LYMPHOCYTE_POLARITY	0.0257138	0.0198538
GOBP_POSITIVE_REGULATION_OF_LIPID_METABOLIC_PROCESS	0.0258458	0.0199557
GOBP_POSITIVE_REGULATION_OF_HOMOTYPIC_CELL_CELL_ADHESION	0.0476033	0.0367547
GOBP_TOLL_LIKE_RECEPTOR_7_SIGNALING_PATHWAY	0.0321739	0.0248416
GOBP_NEGATIVE_REGULATION_OF_T_CELL_CYTOKINE_PRODUCTION	0.0346014	0.0267159
GOBP_T_HELPER_1_CELL_DIFFERENTIATION	0.0419133	0.0323615
GOBP_ACTIVATION_OF_PHOSPHOLIPASE_C_ACTIVITY	0.0478783	0.0369671
GOBP_REGULATION_OF_GTPASE_ACTIVITY	0.00217378	0.00167839
GOBP_REGULATION_OF_APOPTOTIC_CELL_CLEARANCE	0.0361294	0.0278957
GOBP_POSITIVE_REGULATION_OF_PROTEIN_KINASE_ACTIVITY	0.00190679	0.00147224
GOBP_REGULATION_OF_NATURAL_KILLER_CELL_DIFFERENTIATION	0.0223339	0.0172441
GOBP_POSITIVE_REGULATION_OF_KINASE_ACTIVITY	0.000181307	0.000139988
GOBP_POSITIVE_REGULATION_OF_MAP_KINASE_ACTIVITY	0.0223108	0.0172263
GOBP_NEGATIVE_REGULATION_OF_LOCOMOTION	0.00181271	0.00139961
GOBP_POSITIVE_REGULATION_OF_MYELOID_LEUKOCYTE_MEDIATED_IMMUNITY	0.0448198	0.0346056
GOBP_POSITIVE_REGULATION_OF_T_CELL_DIFFERENTIATION_IN_THYMUS	0.0419133	0.0323615
GOBP_REGULATION_OF_CHRONIC_INFLAMMATORY_RESPONSE	0.0419133	0.0323615
GOBP_RESPIRATORY_BURST_INVOLVED_IN_DEFENSE_RESPONSE	0.0336976	0.0260181
GOBP_REGULATION_OF_DNA_BINDING_TRANSCRIPTION_FACTOR_ACTIVITY	0.000362791	0.000280113
GOBP_POSITIVE_REGULATION_OF_RHO_PROTEIN_SIGNAL_TRANSDUCTION	0.0463352	0.0357756
GOBP_REGULATION_OF_BODY_FLUID_LEVELS	0.0021471	0.00165779
GOBP_TOLL_LIKE_RECEPTOR_3_SIGNALING_PATHWAY	0.0489423	0.0377886
GOBP_POSITIVE_REGULATION_OF_TOLERANCE_INDUCTION	0.0324648	0.0250662
GOBP_BIOLOGICAL_PROCESS_INVOLVED_IN_INTERACTION_WITH_HOST	0.0165173	0.0127531
GOBP_REGULATION_OF_MAP_KINASE_ACTIVITY	0.0112221	0.00866461
GOBP_POSITIVE_REGULATION_OF_PATTERN_RECOGNITION_RECEPTOR_SIGNALING_PATHWAY	0.0484081	0.0373761
GOBP_REGULATION_OF_T_HELPER_17_CELL_DIFFERENTIATION	0.0454065	0.0350586
GOBP_REGULATION_OF_ACUTE_INFLAMMATORY_RESPONSE_TO_ANTIGENIC_STIMULUS	0.0471129	0.0363761
GOBP_STRESS_ACTIVATED_PROTEIN_KINASE_SIGNALING_CASCADE	0.00694706	0.00536386
GOBP_REGULATION_OF_EPITHELIAL_CELL_APOPTOTIC_PROCESS	0.0406834	0.0314119
GOBP_PROTEIN_MONO_ADP_RIBOSYLATION	0.0427413	0.0330008
GOBP_NEGATIVE_REGULATION_OF_DNA_BINDING_TRANSCRIPTION_FACTOR_ACTIVITY	0.0183476	0.0141663
GOBP_VASCULAR_ENDOTHELIAL_GROWTH_FACTOR_PRODUCTION	0.0461653	0.0356445
GOBP_NEGATIVE_REGULATION_OF_PEPTIDASE_ACTIVITY	0.0151067	0.011664
GOBP_ENDOTHELIUM_DEVELOPMENT	0.0295877	0.0228448
GOBP_REGULATION_OF_CELL_SHAPE	0.026485	0.0204492
GOBP_POSITIVE_REGULATION_OF_PEPTIDASE_ACTIVITY	0.0294277	0.0227213
GOBP_POSITIVE_REGULATION_OF_ION_TRANSMEMBRANE_TRANSPORT	0.031969	0.0246834
GOBP_ADENYLATE_CYCLASE_MODULATING_G_PROTEIN_COUPLED_RECEPTOR_SIGNALING_PATHWAY	0.0170069	0.0131311
GOBP_ANATOMICAL_STRUCTURE_HOMEOSTASIS	0.00653513	0.00504581
GOBP_REGULATION_OF_ION_TRANSMEMBRANE_TRANSPORT	0.00207448	0.00160172
GOBP_REGULATION_OF_STRESS_ACTIVATED_PROTEIN_KINASE_SIGNALING_CASCADE	0.0258935	0.0199925
GOBP_AMINE_METABOLIC_PROCESS	0.0408442	0.031536
GOBP_POSITIVE_REGULATION_OF_DNA_BINDING_TRANSCRIPTION_FACTOR_ACTIVITY	0.0116392	0.00898667
GOBP_JNK_CASCADE	0.0329644	0.025452
GOBP_POSITIVE_REGULATION_OF_PROTEIN_CONTAINING_COMPLEX_ASSEMBLY	0.0339324	0.0261994
GOBP_SMOOTH_MUSCLE_CELL_PROLIFERATION	0.0328871	0.0253923
GOBP_TISSUE_REMODELING	0.0334218	0.0258051
GOBP_WOUND_HEALING	0.00335015	0.00258667
GOBP_REGULATION_OF_EXOCYTOSIS	0.033547	0.0259018
GOBP_REGULATION_OF_BLOOD_PRESSURE	0.0406221	0.0313646
GOBP_REGULATION_OF_SMALL_GTPASE_MEDIATED_SIGNAL_TRANSDUCTION	0.0144832	0.0111825
GOBP_RESPONSE_TO_MECHANICAL_STIMULUS	0.0464683	0.0358784
GOBP_EXTRINSIC_APOPTOTIC_SIGNALING_PATHWAY	0.0417599	0.0322431
GOBP_REGULATION_OF_CATION_TRANSMEMBRANE_TRANSPORT	0.0223339	0.0172441
GOBP_NEGATIVE_REGULATION_OF_TRANSPORT	0.00876075	0.00676422
GOBP_SMALL_GTPASE_MEDIATED_SIGNAL_TRANSDUCTION	0.0119714	0.00924318
GOBP_NEGATIVE_REGULATION_OF_HYDROLASE_ACTIVITY	0.033547	0.0259018
GOBP_NEGATIVE_REGULATION_OF_PROTEOLYSIS	0.0378408	0.0292171
GOBP_REGULATION_OF_ACTIN_FILAMENT_BASED_PROCESS	0.0435477	0.0336234
GOBP_CELL_SUBSTRATE_ADHESION	0.0485804	0.0375092
GOBP_ACTIN_FILAMENT_ORGANIZATION	0.0427413	0.0330008
GOBP_LIPID_LOCALIZATION	0.0484875	0.0374375
GOBP_AXON_DEVELOPMENT	0.0232004	0.0179132
GOBP_CANONICAL_WNT_SIGNALING_PATHWAY	0.0481274	0.0371594
GOBP_IN_UTERO_EMBRYONIC_DEVELOPMENT	0.0420782	0.0324888
GOBP_REGULATION_OF_MITOTIC_CELL_CYCLE	0.0187472	0.0144748
GOBP_PROTEASOMAL_PROTEIN_CATABOLIC_PROCESS	0.0183775	0.0141894
GOBP_CAMERA_TYPE_EYE_DEVELOPMENT	0.0270238	0.0208652
GOBP_ESTABLISHMENT_OF_PROTEIN_LOCALIZATION_TO_ORGANELLE	0.03052	0.0235647
GOBP_REGULATION_OF_CANONICAL_WNT_SIGNALING_PATHWAY	0.0419133	0.0323615
GOBP_GLYCOSYLATION	0.0470546	0.0363311
GOBP_GERM_CELL_DEVELOPMENT	0.0388004	0.029958
GOBP_SKIN_DEVELOPMENT	0.0423281	0.0326818
GOBP_CELLULAR_PROCESS_INVOLVED_IN_REPRODUCTION_IN_MULTICELLULAR_ORGANISM	0.0152559	0.0117792
GOBP_PROTEIN_CONTAINING_COMPLEX_DISASSEMBLY	0.0374499	0.0289153
GOBP_CELL_CELL_SIGNALING_BY_WNT	0.0139778	0.0107923
GOBP_REGIONALIZATION	0.0194618	0.0150265
GOBP_NUCLEAR_TRANSPORT	0.0295391	0.0228073
GOBP_PROTEIN_ACETYLATION	0.0336034	0.0259454
GOBP_NUCLEIC_ACID_PHOSPHODIESTER_BOND_HYDROLYSIS	0.026494	0.0204562
GOBP_REGULATION_OF_CELL_CYCLE_PHASE_TRANSITION	0.00868334	0.00670445
GOBP_MITOTIC_CELL_CYCLE_PHASE_TRANSITION	0.00901833	0.0069631
GOBP_REGULATION_OF_PROTEIN_STABILITY	0.017331	0.0133814
GOBP_EPIDERMAL_CELL_DIFFERENTIATION	0.032866	0.025376
GOBP_SMOOTHENED_SIGNALING_PATHWAY	0.0450051	0.0347486
GOBP_CELLULAR_RESPIRATION	0.0234218	0.0180841
GOBP_PROTEIN_ACYLATION	0.0106	0.00818428
GOBP_FERTILIZATION	0.0283822	0.021914
GOBP_RNA_MODIFICATION	0.0441083	0.0340562
GOBP_MACROAUTOPHAGY	0.0123195	0.00951196
GOBP_MITOCHONDRIAL_TRANSPORT	0.028869	0.0222899
GOBP_PATTERN_SPECIFICATION_PROCESS	0.00199357	0.00153925
GOBP_TRANSLATIONAL_INITIATION	0.0417599	0.0322431
GOBP_KINETOCHORE_ORGANIZATION	0.0427413	0.0330008
GOBP_HISTONE_ARGININE_METHYLATION	0.0475683	0.0367277
GOBP_SMOOTHENED_SIGNALING_PATHWAY_INVOLVED_IN_DORSAL_VENTRAL_NEURAL_TUBE_PATTERNING	0.0475683	0.0367277
GOBP_RIBOSOMAL_SUBUNIT_EXPORT_FROM_NUCLEUS	0.0482214	0.037232
GOBP_MITOTIC_RECOMBINATION	0.0328403	0.0253562
GOBP_ASPARTATE_FAMILY_AMINO_ACID_BIOSYNTHETIC_PROCESS	0.0408535	0.0315432
GOBP_POSITIVE_REGULATION_OF_CELL_CYCLE_PROCESS	0.0103087	0.00795938
GOBP_PALLIUM_DEVELOPMENT	0.0222367	0.0171691
GOBP_REGULATION_OF_PROTEIN_LOCALIZATION_TO_CHROMOSOME_TELOMERIC_REGION	0.0494207	0.038158
GOBP_POSITIVE_REGULATION_OF_MRNA_SPLICING_VIA_SPLICEOSOME	0.0419098	0.0323588
GOBP_EPIDERMIS_DEVELOPMENT	0.00313779	0.0024227
GOBP_CHROMATIN_ASSEMBLY_OR_DISASSEMBLY	0.0253728	0.0195905
GOBP_MISMATCH_REPAIR	0.0450051	0.0347486
GOBP_TAIL_ANCHORED_MEMBRANE_PROTEIN_INSERTION_INTO_ER_MEMBRANE	0.0486978	0.0375998
GOBP_REGULATION_OF_DNA_REPLICATION	0.0410599	0.0317026
GOBP_NEGATIVE_REGULATION_OF_CELL_CYCLE_PHASE_TRANSITION	0.0140614	0.0108569
GOBP_REGULATION_OF_STEM_CELL_DIFFERENTIATION	0.0466643	0.0360298
GOBP_PEPTIDYL_METHIONINE_MODIFICATION	0.042225	0.0326021
GOBP_PROTEIN_METHYLATION	0.0139583	0.0107773
GOBP_CENTROMERE_COMPLEX_ASSEMBLY	0.0463352	0.0357756
GOBP_PROTEIN_LOCALIZATION_TO_CHROMOSOME_CENTROMERIC_REGION	0.0357144	0.0275753
GOBP_PROTEIN_HETEROTETRAMERIZATION	0.0419133	0.0323615
GOBP_PROTEIN_HYDROXYLATION	0.0453805	0.0350386
GOBP_STRESS_GRANULE_ASSEMBLY	0.0419133	0.0323615
GOBP_REGULATION_OF_DNA_REPAIR	0.0324648	0.0250662
GOBP_MITOCHONDRIAL_CYTOCHROME_C_OXIDASE_ASSEMBLY	0.032023	0.0247252
GOBP_MEIOTIC_CELL_CYCLE_PROCESS	0.0105582	0.00815202
GOBP_ANTERIOR_POSTERIOR_PATTERN_SPECIFICATION	0.00821641	0.00634393
GOBP_PROTEIN_CONTAINING_COMPLEX_LOCALIZATION	0.0241602	0.0186542
GOBP_POSITIVE_REGULATION_OF_DNA_REPLICATION	0.0442002	0.0341272
GOBP_PEPTIDYL_ARGININE_N_METHYLATION	0.0432341	0.0333813
GOBP_MITOCHONDRION_ORGANIZATION	0.000723099	0.000558309
GOBP_PROTEIN_FOLDING	0.00971879	0.00750393
GOBP_NUCLEAR_EXPORT	0.0182512	0.0140918
GOBP_PYRIMIDINE_RIBONUCLEOSIDE_TRIPHOSPHATE_METABOLIC_PROCESS	0.034749	0.0268299
GOBP_AEROBIC_RESPIRATION	0.0164785	0.0127231
GOBP_ESTABLISHMENT_OF_PROTEIN_LOCALIZATION_TO_CHROMOSOME	0.0363054	0.0280316
GOBP_REGULATION_OF_SPINDLE_ORGANIZATION	0.0423592	0.0327058
GOBP_POSITIVE_REGULATION_OF_SMOOTHENED_SIGNALING_PATHWAY	0.0321739	0.0248416
GOBP_MITOCHONDRIAL_FUSION	0.031969	0.0246834
GOBP_PROTEASOME_MEDIATED_UBIQUITIN_DEPENDENT_PROTEIN_CATABOLIC_PROCESS	0.00159793	0.00123377
GOBP_PROTEIN_LOCALIZATION_TO_CHROMOSOME	0.0474074	0.0366035
GOBP_PROTEIN_LOCALIZATION_TO_CILIARY_MEMBRANE	0.0328403	0.0253562
GOBP_POSITIVE_REGULATION_OF_CELL_CYCLE	0.00192916	0.00148952
GOBP_FEMALE_MEIOTIC_NUCLEAR_DIVISION	0.0357756	0.0276225
GOBP_MRNA_CATABOLIC_PROCESS	0.00577546	0.00445927
GOBP_ANTEROGRADE_AXONAL_TRANSPORT	0.0438382	0.0338477
GOBP_POSITIVE_REGULATION_OF_MRNA_PROCESSING	0.0319795	0.0246916
GOBP_MICROTUBULE_ANCHORING	0.0323193	0.0249539
GOBP_DENDRITE_MORPHOGENESIS	0.0177469	0.0137025
GOBP_PSEUDOURIDINE_SYNTHESIS	0.0280972	0.021694
GOBP_ATTACHMENT_OF_SPINDLE_MICROTUBULES_TO_KINETOCHORE	0.03052	0.0235647
GOBP_POSITIVE_REGULATION_OF_RNA_SPLICING	0.0360476	0.0278326
GOBP_NEGATIVE_REGULATION_OF_CELL_CYCLE_PROCESS	0.00464124	0.00358353
GOBP_TELOMERASE_RNA_LOCALIZATION	0.0470518	0.036329
GOBP_SPECIFICATION_OF_SYMMETRY	0.0254379	0.0196408
GOBP_SPINDLE_LOCALIZATION	0.0324648	0.0250662
GOBP_MATURATION_OF_5_8S_RRNA_FROM_TRICISTRONIC_RRNA_TRANSCRIPT_SSU_RRNA_5_8S_RRNA_LSU_RRNA	0.0202497	0.0156349
GOBP_NON_MEMBRANE_BOUNDED_ORGANELLE_ASSEMBLY	0.00129561	0.00100035
GOBP_MATURATION_OF_LSU_RRNA_FROM_TRICISTRONIC_RRNA_TRANSCRIPT_SSU_RRNA_5_8S_RRNA_LSU_RRNA	0.0263007	0.0203069
GOBP_SISTER_CHROMATID_COHESION	0.0324648	0.0250662
GOBP_POSITIVE_REGULATION_OF_DNA_TEMPLATED_TRANSCRIPTION_INITIATION	0.0445309	0.0343825
GOBP_DNA_TEMPLATED_TRANSCRIPTION_TERMINATION	0.0408634	0.0315508
GOBP_PEPTIDYL_LYSINE_MODIFICATION	0.000685822	0.000529527
GOBP_PROTEIN_HETEROOLIGOMERIZATION	0.0240713	0.0185856
GOBP_PIGMENTATION	0.0323626	0.0249873
GOBP_MITOCHONDRIAL_MEMBRANE_ORGANIZATION	0.0293968	0.0226974
GOBP_TETRAPYRROLE_BIOSYNTHETIC_PROCESS	0.0254379	0.0196408
GOBP_NEURAL_TUBE_DEVELOPMENT	0.0185605	0.0143307
GOBP_ENERGY_DERIVATION_BY_OXIDATION_OF_ORGANIC_COMPOUNDS	0.0025218	0.0019471
GOBP_POSITIVE_REGULATION_OF_CHROMOSOME_ORGANIZATION	0.031969	0.0246834
GOBP_RECOMBINATIONAL_REPAIR	0.0147735	0.0114067
GOBP_CHROMATIN_ORGANIZATION	0.000178527	0.000137841
GOBP_BASE_EXCISION_REPAIR	0.0494207	0.038158
GOBP_MRNA_MODIFICATION	0.0199891	0.0154337
GOBP_DNA_TEMPLATED_TRANSCRIPTION_ELONGATION	0.0321874	0.0248521
GOBP_RESPIRATORY_ELECTRON_TRANSPORT_CHAIN	0.0210728	0.0162704
GOBP_POSITIVE_REGULATION_OF_TELOMERASE_RNA_LOCALIZATION_TO_CAJAL_BODY	0.0194618	0.0150265
GOBP_NUCLEAR_PORE_ORGANIZATION	0.019776	0.0152691
GOBP_CYTOPLASMIC_TRANSLATIONAL_INITIATION	0.0192472	0.0148609
GOBP_HAIR_FOLLICLE_MATURATION	0.0186988	0.0144375
GOBP_NEGATIVE_REGULATION_OF_MRNA_PROCESSING	0.0195937	0.0151284
GOBP_ATP_SYNTHESIS_COUPLED_ELECTRON_TRANSPORT	0.0264643	0.0204333
GOBP_SECONDARY_METABOLITE_BIOSYNTHETIC_PROCESS	0.00976284	0.00753794
GOBP_POSITIVE_REGULATION_OF_UBIQUITIN_PROTEIN_TRANSFERASE_ACTIVITY	0.0211618	0.0163392
GOBP_TRANSCRIPTION_PREINITIATION_COMPLEX_ASSEMBLY	0.0277883	0.0214555
GOBP_DNA_STRAND_ELONGATION	0.0205351	0.0158553
GOBP_RESPIRATORY_CHAIN_COMPLEX_IV_ASSEMBLY	0.00909199	0.00701998
GOBP_POSITIVE_REGULATION_OF_CELL_CYCLE_G2_M_PHASE_TRANSITION	0.0182512	0.0140918
GOBP_AUTOPHAGY_OF_MITOCHONDRION	0.0327767	0.0253071
GOBP_TRANSCRIPTION_BY_RNA_POLYMERASE_I	0.0266039	0.020541
GOBP_SPLICEOSOMAL_SNRNP_ASSEMBLY	0.0345708	0.0266923
GOBP_REGULATION_OF_TRANSLATIONAL_FIDELITY	0.0193289	0.0149239
GOBP_PROTEIN_LOCALIZATION_TO_CYTOSKELETON	0.039174	0.0302465
GOBP_PROTEIN_MANNOSYLATION	0.0136113	0.0105094
GOBP_PROTEIN_INSERTION_INTO_ER_MEMBRANE	0.00989638	0.00764105
GOBP_PROTEIN_MODIFICATION_BY_SMALL_PROTEIN_REMOVAL	0.00561564	0.00433587
GOBP_TRANSLATIONAL_ELONGATION	0.0241343	0.0186343
GOBP_HISTONE_MODIFICATION	0.000156583	0.000120899
GOBP_REGULATION_OF_MICROTUBULE_POLYMERIZATION_OR_DEPOLYMERIZATION	0.0219792	0.0169702
GOBP_MEIOTIC_CELL_CYCLE	0.00319221	0.00246472
GOBP_CLEAVAGE_INVOLVED_IN_RRNA_PROCESSING	0.0104904	0.00809969
GOBP_PROXIMAL_DISTAL_PATTERN_FORMATION	0.0228367	0.0176324
GOBP_PROTEIN_LOCALIZATION_TO_CHROMOSOME_TELOMERIC_REGION	0.0113467	0.00876088
GOBP_PIGMENT_METABOLIC_PROCESS	0.0183173	0.0141429
GOBP_N_TERMINAL_PROTEIN_AMINO_ACID_MODIFICATION	0.0163845	0.0126506
GOBP_CHROMATIN_REMODELING	0.00243788	0.0018823
GOBP_PEPTIDYL_ARGININE_METHYLATION	0.0151053	0.0116629
GOBP_CELL_CYCLE_G2_M_PHASE_TRANSITION	0.0073444	0.00567065
GOBP_MRNA_EXPORT_FROM_NUCLEUS	0.0152559	0.0117792
GOBP_METHYLATION	0.000337588	0.000260654
GOBP_SPLICEOSOMAL_COMPLEX_ASSEMBLY	0.0225111	0.017381
GOBP_RRNA_TRANSCRIPTION	0.0129164	0.00997282
GOBP_SNRNA_PROCESSING	0.00694918	0.0053655
GOBP_MELANOCYTE_DIFFERENTIATION	0.00362387	0.00279801
GOBP_REGULATION_OF_ALTERNATIVE_MRNA_SPLICING_VIA_SPLICEOSOME	0.0137126	0.0105876
GOBP_NCRNA_TRANSCRIPTION	0.0126701	0.00978264
GOBP_AXO_DENDRITIC_TRANSPORT	0.0137828	0.0106418
GOBP_AMINO_ACID_ACTIVATION	0.00694918	0.0053655
GOBP_MONOUBIQUITINATED_PROTEIN_DEUBIQUITINATION	0.00530693	0.00409751
GOBP_DNA_PACKAGING	0.00422598	0.0032629
GOBP_NADH_DEHYDROGENASE_COMPLEX_ASSEMBLY	0.0049074	0.00378903
GOBP_CHROMOSOME_CONDENSATION	0.00439442	0.00339295
GOBP_SINGLE_FERTILIZATION	0.00439826	0.00339592
GOBP_HISTONE_DEUBIQUITINATION	0.00736252	0.00568464
GOBP_NEGATIVE_REGULATION_OF_CHROMOSOME_ORGANIZATION	0.010128	0.00781985
GOBP_DOUBLE_STRAND_BREAK_REPAIR	0.0012264	0.000946911
GOBP_MITOTIC_METAPHASE_PLATE_CONGRESSION	0.00650536	0.00502282
GOBP_AXONAL_TRANSPORT	0.00905782	0.00699359
GOBP_MATURATION_OF_SSU_RRNA_FROM_TRICISTRONIC_RRNA_TRANSCRIPT_SSU_RRNA_5_8S_RRNA_LSU_RRNA	0.00362387	0.00279801
GOBP_NUCLEOBASE_CONTAINING_COMPOUND_TRANSPORT	0.000933837	0.00072102
GOBP_SNRNA_METABOLIC_PROCESS	0.00912616	0.00704636
GOBP_SPINDLE_ASSEMBLY	0.00512265	0.00395523
GOBP_CILIUM_ORGANIZATION	0.000148409	0.000114588
GOBP_REGULATION_OF_CHROMOSOME_SEPARATION	0.0106787	0.00824507
GOBP_MICROTUBULE_NUCLEATION	0.00537524	0.00415025
GOBP_TRNA_METHYLATION	0.00416136	0.00321301
GOBP_HINDLIMB_MORPHOGENESIS	0.00505804	0.00390534
GOBP_RIBOSOMAL_LARGE_SUBUNIT_ASSEMBLY	0.00339414	0.00262063
GOBP_RRNA_METHYLATION	0.00322511	0.00249012
GOBP_PROTEIN_TRANSMEMBRANE_TRANSPORT	0.0072469	0.00559537
GOBP_INTRACILIARY_TRANSPORT	0.00466565	0.00360237
GOBP_DNA_REPLICATION_INITIATION	0.00406738	0.00314044
GOBP_METAPHASE_ANAPHASE_TRANSITION_OF_CELL_CYCLE	0.00701229	0.00541422
GOBP_ORGANELLE_DISASSEMBLY	0.00353817	0.00273184
GOBP_REGULATION_OF_DNA_TEMPLATED_TRANSCRIPTION_INITIATION	0.00362387	0.00279801
GOBP_INNER_MITOCHONDRIAL_MEMBRANE_ORGANIZATION	0.00211162	0.00163039
GOBP_MRNA_TRANSPORT	0.00198195	0.00153027
GOBP_REGULATION_OF_CHROMOSOME_SEGREGATION	0.00687738	0.00531006
GOBP_MITOTIC_DNA_INTEGRITY_CHECKPOINT_SIGNALING	0.00434819	0.00335726
GOBP_TELOMERE_MAINTENANCE	0.00241475	0.00186444
GOBP_CENTRIOLE_ASSEMBLY	0.00302544	0.00233596
GOBP_MICROTUBULE_POLYMERIZATION	0.00457363	0.00353133
GOBP_PROTEIN_LOCALIZATION_TO_CILIUM	0.00505128	0.00390012
GOBP_REGULATION_OF_MICROTUBULE_CYTOSKELETON_ORGANIZATION	0.00140244	0.00108283
GOBP_ESTABLISHMENT_OF_RNA_LOCALIZATION	0.00104774	0.000808969
GOBP_TELOMERE_ORGANIZATION	0.00189217	0.00146096
GOBP_CHROMOSOME_SEPARATION	0.00278778	0.00215246
GOBP_MANNOSYLATION	0.00132877	0.00102595
GOBP_PROTEIN_TRANSMEMBRANE_IMPORT_INTO_INTRACELLULAR_ORGANELLE	0.00220686	0.00170393
GOBP_DNA_DEPENDENT_DNA_REPLICATION	0.00180806	0.00139601
GOBP_MATURATION_OF_LSU_RRNA	0.000715897	0.000552748
GOBP_ALTERNATIVE_MRNA_SPLICING_VIA_SPLICEOSOME	0.00357124	0.00275737
GOBP_MATURATION_OF_5_8S_RRNA	0.00173614	0.00134048
GOBP_MITOTIC_SPINDLE_ASSEMBLY	0.00237322	0.00183238
GOBP_NUCLEOSOME_ORGANIZATION	0.00231031	0.00178381
GOBP_EMBRYONIC_DIGIT_MORPHOGENESIS	0.00182739	0.00141094
GOBP_RNA_POLYADENYLATION	0.00125353	0.000967859
GOBP_GOLGI_VESICLE_TRANSPORT	9.04e-05	6.98e-05
GOBP_TRANSCRIPTION_INITIATION_FROM_RNA_POLYMERASE_II_PROMOTER	0.00245584	0.00189617
GOBP_GOLGI_ORGANIZATION	0.00108677	0.0008391
GOBP_MICROTUBULE_POLYMERIZATION_OR_DEPOLYMERIZATION	0.00190275	0.00146912
GOBP_RRNA_MODIFICATION	0.000690924	0.000533466
GOBP_SPINDLE_ORGANIZATION	0.000217172	0.00016768
GOBP_NUCLEOTIDE_EXCISION_REPAIR	0.00106265	0.00082048
GOBP_MICROTUBULE_BASED_TRANSPORT	0.00028191	0.000217664
GOBP_MATURATION_OF_SSU_RRNA	0.000769752	0.000594329
GOBP_REGULATION_OF_MRNA_METABOLIC_PROCESS	2.74e-05	2.12e-05
GOBP_MICROTUBULE_BASED_MOVEMENT	6.5e-06	5.02e-06
GOBP_PROTEIN_DNA_COMPLEX_ASSEMBLY	0.000634393	0.000489818
GOBP_DNA_INTEGRITY_CHECKPOINT_SIGNALING	0.000663143	0.000512017
GOBP_NCRNA_3_END_PROCESSING	0.000405416	0.000313024
GOBP_ENDOPLASMIC_RETICULUM_ORGANIZATION	0.000938841	0.000724884
GOBP_REGULATION_OF_CYTOKINESIS	0.000701094	0.000541319
GOBP_INTRACELLULAR_PROTEIN_TRANSMEMBRANE_TRANSPORT	0.000539381	0.000416459
GOBP_MITOCHONDRIAL_RNA_METABOLIC_PROCESS	0.000556266	0.000429496
GOBP_METAPHASE_PLATE_CONGRESSION	0.00149514	0.0011544
GOBP_GPI_ANCHOR_METABOLIC_PROCESS	0.000267816	0.000206782
GOBP_TRANSPORT_ALONG_MICROTUBULE	0.000294856	0.00022766
GOBP_REGULATION_OF_MICROTUBULE_BASED_PROCESS	1.89e-05	1.46e-05
GOBP_RNA_EXPORT_FROM_NUCLEUS	0.000389566	0.000300786
GOBP_RNA_LOCALIZATION	1.87e-05	1.44e-05
GOBP_MITOTIC_CELL_CYCLE_CHECKPOINT_SIGNALING	0.000372103	0.000287303
GOBP_REGULATION_OF_CHROMOSOME_ORGANIZATION	1.58e-05	1.22e-05
GOBP_CHROMOSOME_LOCALIZATION	0.000184057	0.000142112
GOBP_MRNA_3_END_PROCESSING	0.000329516	0.000254421
GOBP_MITOTIC_NUCLEAR_DIVISION	3.23e-06	2.49e-06
GOBP_MITOCHONDRIAL_RESPIRATORY_CHAIN_COMPLEX_ASSEMBLY	0.00028191	0.000217664
GOBP_CYTOSKELETON_DEPENDENT_CYTOKINESIS	8.73e-05	6.74e-05
GOBP_MITOTIC_CYTOKINESIS	0.000186606	0.00014408
GOBP_EMBRYONIC_APPENDAGE_MORPHOGENESIS	7.3e-05	5.64e-05
GOBP_DNA_REPLICATION	1.18e-06	9.12e-07
GOBP_APPENDAGE_DEVELOPMENT	2.43e-05	1.88e-05
GOBP_CENTROSOME_DUPLICATION	0.000172591	0.000133259
GOBP_CELL_CYCLE_CHECKPOINT_SIGNALING	1.1e-05	8.52e-06
GOBP_REGULATION_OF_RNA_SPLICING	2.1e-05	1.62e-05
GOBP_PIGMENT_BIOSYNTHETIC_PROCESS	4.3e-05	3.32e-05
GOBP_ENDOPLASMIC_RETICULUM_TO_GOLGI_VESICLE_MEDIATED_TRANSPORT	3.67e-05	2.83e-05
GOBP_REGULATION_OF_MRNA_SPLICING_VIA_SPLICEOSOME	3.5e-05	2.7e-05
GOBP_ORGANELLE_FISSION	1.28e-08	9.85e-09
GOBP_DNA_TEMPLATED_TRANSCRIPTION_INITIATION	2.31e-05	1.79e-05
GOBP_MITOTIC_SPINDLE_ORGANIZATION	1.82e-05	1.4e-05
GOBP_RIBOSOME_ASSEMBLY	5.16e-05	3.98e-05
GOBP_KERATINIZATION	4.3e-05	3.32e-05
GOBP_APPENDAGE_MORPHOGENESIS	1.01e-05	7.77e-06
GOBP_MITOTIC_SISTER_CHROMATID_SEGREGATION	1.64e-06	1.26e-06
GOBP_PROTEIN_DNA_COMPLEX_SUBUNIT_ORGANIZATION	1.38e-06	1.07e-06
GOBP_DNA_CONFORMATION_CHANGE	4.25e-08	3.28e-08
GOBP_RNA_METHYLATION	1.69e-05	1.31e-05
GOBP_DNA_REPAIR	4.12e-09	3.18e-09
GOBP_MICROTUBULE_CYTOSKELETON_ORGANIZATION_INVOLVED_IN_MITOSIS	1.08e-06	8.34e-07
GOBP_SISTER_CHROMATID_SEGREGATION	4.29e-07	3.31e-07
GOBP_CYTOKINESIS	1.29e-06	9.94e-07
GOBP_DNA_GEOMETRIC_CHANGE	1.22e-06	9.42e-07
GOBP_REGULATION_OF_MRNA_PROCESSING	1.04e-06	8.03e-07
GOBP_TRNA_MODIFICATION	2.33e-06	1.8e-06
GOBP_RIBOSOMAL_SMALL_SUBUNIT_BIOGENESIS	1.46e-06	1.13e-06
GOBP_MICROTUBULE_ORGANIZING_CENTER_ORGANIZATION	1.95e-07	1.51e-07
GOBP_NUCLEAR_CHROMOSOME_SEGREGATION	4.12e-09	3.18e-09
GOBP_RNA_3_END_PROCESSING	4.9e-08	3.79e-08
GOBP_TRNA_PROCESSING	2.49e-08	1.92e-08
GOBP_MITOCHONDRIAL_TRANSLATION	3.35e-07	2.59e-07
GOBP_CHROMOSOME_SEGREGATION	4.12e-09	3.18e-09
GOBP_RIBOSOMAL_LARGE_SUBUNIT_BIOGENESIS	1.78e-08	1.37e-08
GOBP_MITOCHONDRIAL_GENE_EXPRESSION	6.36e-09	4.91e-09
GOBP_TRNA_METABOLIC_PROCESS	4.12e-09	3.18e-09
GOBP_RNA_SPLICING_VIA_TRANSESTERIFICATION_REACTIONS	4.12e-09	3.18e-09
GOBP_RIBONUCLEOPROTEIN_COMPLEX_SUBUNIT_ORGANIZATION	4.12e-09	3.18e-09
GOBP_CYTOPLASMIC_TRANSLATION	4.12e-09	3.18e-09
GOBP_RNA_SPLICING	4.12e-09	3.18e-09
GOBP_MRNA_PROCESSING	4.12e-09	3.18e-09
GOBP_RRNA_METABOLIC_PROCESS	4.12e-09	3.18e-09
GOBP_NCRNA_METABOLIC_PROCESS	4.12e-09	3.18e-09
GOBP_NCRNA_PROCESSING	4.12e-09	3.18e-09
GOBP_RIBOSOME_BIOGENESIS	4.12e-09	3.18e-09
GOBP_RIBONUCLEOPROTEIN_COMPLEX_BIOGENESIS	4.12e-09	3.18e-09

## Sheet: Supplementary Table 5
Supplementary Table 5. TIDE analyses of TCGA-UVM cohort.
sample	No benefits	Responder	TIDE	IFNG	MSI Expr Sig	Merck18	CD274	CD8	CTL.flag	Dysfunction	Exclusion	MDSC	CAF	TAM M2	ICDscore
TCGA.RZ.AB0B.01A	FALSE	Non-responder	2.03	1.22	0.93	1.18	0.2	0.14	FALSE	-1.59	2.03	0.12	0.16	0	High
TCGA.V4.A9E7.01A	FALSE	Non-responder	2.03	0.34	0.87	0.58	0.01	-0.46	FALSE	-1.38	2.03	0.14	0.13	0.02	High
TCGA.V4.A9EI.01A	FALSE	Non-responder	2.08	1.24	0.94	1.17	-0.05	0.38	FALSE	-1.63	2.08	0.14	0.14	0.01	High
TCGA.V4.A9EO.01A	FALSE	Non-responder	2.03	0.6	0.95	0.66	-0.14	-0.46	FALSE	-1.57	2.03	0.12	0.15	0.02	High
TCGA.V4.A9EQ.01A	FALSE	Non-responder	1.9	0.75	0.82	1.14	-0.14	-0.16	FALSE	-0.77	1.9	0.11	0.14	0.01	High
TCGA.V4.A9ES.01A	FALSE	Non-responder	2.03	0.42	0.93	0.53	-0.27	-0.49	FALSE	-1.59	2.03	0.14	0.13	0.02	High
TCGA.V4.A9EU.01A	FALSE	Non-responder	1.75	1.24	0.93	1.21	0.22	0.07	FALSE	-1.54	1.75	0.1	0.15	0	High
TCGA.V4.A9EX.01A	FALSE	Non-responder	2.05	1.06	0.91	0.94	-0.19	-0.22	FALSE	-1.63	2.05	0.13	0.14	0.01	High
TCGA.V4.A9F1.01A	FALSE	Non-responder	1.9	1.16	0.93	1.1	0.11	-0.21	FALSE	-1.52	1.9	0.11	0.15	0.01	High
TCGA.V4.A9F5.01A	FALSE	Non-responder	2.02	0.55	0.91	0.78	-0.23	-0.45	FALSE	-1.15	2.02	0.13	0.14	0.01	High
TCGA.V4.A9F8.01A	FALSE	Non-responder	1.98	0.77	0.82	1.1	-0.28	-0.36	FALSE	-0.66	1.98	0.12	0.15	0.01	High
TCGA.VD.A8KF.01A	FALSE	Non-responder	1.82	1.02	0.94	0.99	0.25	-0.05	FALSE	-1.63	1.82	0.1	0.14	0.01	High
TCGA.VD.A8KH.01A	FALSE	Non-responder	1.87	0.54	0.95	0.52	-0.26	-0.45	FALSE	-1.62	1.87	0.13	0.11	0.01	High
TCGA.VD.A8KK.01A	FALSE	Non-responder	1.97	1	0.9	1.23	-0.11	0.14	FALSE	-1.02	1.97	0.12	0.14	0.01	High
TCGA.VD.AA8M.01A	FALSE	Non-responder	1.91	0.72	0.93	0.86	0.21	-0.3	FALSE	-1.02	1.91	0.11	0.15	0.01	High
TCGA.VD.AA8P.01A	FALSE	Non-responder	2.11	0.6	0.86	0.73	0.22	-0.42	FALSE	-1.26	2.11	0.12	0.16	0.02	High
TCGA.VD.AA8Q.01A	FALSE	Non-responder	1.77	0.73	0.77	1.14	0.04	0.14	FALSE	-0.72	1.77	0.09	0.14	0.01	High
TCGA.VD.AA8T.01A	FALSE	Non-responder	1.85	0.63	0.95	0.72	-0.09	-0.2	FALSE	-1.62	1.85	0.1	0.14	0.01	High
TCGA.WC.A87U.01A	FALSE	Non-responder	1.99	0.57	0.95	0.69	0.24	-0.42	FALSE	-1.59	1.99	0.12	0.14	0.02	High
TCGA.WC.A87Y.01A	FALSE	Non-responder	1.7	1.6	0.95	1.96	0.72	1.78	FALSE	-1.16	1.7	0.08	0.16	-0.01	High
TCGA.WC.A882.01A	FALSE	Non-responder	1.9	0.82	0.8	1.21	0.35	-0.23	FALSE	-0.46	1.9	0.1	0.17	0	High
TCGA.WC.A883.01A	FALSE	Non-responder	2.25	0.54	0.86	0.75	0.01	-0.35	FALSE	-1.44	2.25	0.15	0.17	0	High
TCGA.WC.A88A.01A	FALSE	Non-responder	1.99	1.01	0.9	1	-0.06	-0.06	FALSE	-1.35	1.99	0.12	0.14	0.02	High
TCGA.WC.AA9A.01A	FALSE	Non-responder	1.97	0.3	0.96	0.43	-0.05	-0.52	FALSE	-1.66	1.97	0.14	0.12	0.01	High
TCGA.YZ.A980.01A	FALSE	Non-responder	1.97	1.09	0.95	1.16	0.21	0.2	FALSE	-0.93	1.97	0.1	0.17	0	High
TCGA.YZ.A984.01A	FALSE	Non-responder	2.11	0.51	0.88	0.77	0.2	-0.34	FALSE	-0.84	2.11	0.12	0.17	0.01	High
TCGA.V3.A9ZY.01A	FALSE	Non-responder	1.79	0.6	0.89	0.9	0.12	-0.16	FALSE	-0.82	1.79	0.1	0.13	0.01	Low
TCGA.V4.A9E5.01A	FALSE	Non-responder	1.84	0.5	0.92	0.74	-0.08	-0.4	FALSE	-0.84	1.84	0.11	0.13	0.01	Low
TCGA.V4.A9E9.01A	FALSE	Non-responder	1.76	0.35	0.89	0.63	-0.22	-0.42	FALSE	-0.84	1.76	0.11	0.11	0.02	Low
TCGA.V4.A9EA.01A	FALSE	Non-responder	1.84	0.4	0.68	0.72	-0.39	-0.42	FALSE	-0.43	1.84	0.12	0.14	0	Low
TCGA.V4.A9EC.01A	FALSE	Non-responder	1.89	0.5	0.93	0.63	-0.26	-0.38	FALSE	-1.1	1.89	0.12	0.12	0.02	Low
TCGA.V4.A9EF.01A	FALSE	Non-responder	1.93	0.67	0.92	0.88	-0.2	0.01	FALSE	-1.21	1.93	0.12	0.13	0.02	Low
TCGA.V4.A9EJ.01A	FALSE	Non-responder	1.78	0.64	0.94	0.81	-0.02	-0.31	FALSE	-1.36	1.78	0.11	0.13	0.01	Low
TCGA.V4.A9EM.01A	FALSE	Non-responder	1.94	0.7	0.9	0.95	0.39	-0.39	FALSE	-0.98	1.94	0.12	0.16	-0.01	Low
TCGA.V4.A9ET.01A	FALSE	Non-responder	1.94	0.44	0.84	0.66	0.05	-0.43	FALSE	-0.94	1.94	0.12	0.13	0.02	Low
TCGA.V4.A9EW.01A	FALSE	Non-responder	1.91	0.59	0.95	0.65	0.13	-0.34	FALSE	-1.48	1.91	0.13	0.13	0.01	Low
TCGA.V4.A9EY.01A	FALSE	Non-responder	1.72	0.57	0.75	0.97	-0.04	-0.35	FALSE	-0.31	1.72	0.09	0.14	0	Low
TCGA.V4.A9EZ.01A	FALSE	Non-responder	1.74	0.73	0.77	0.94	-0.04	-0.35	FALSE	-0.66	1.74	0.12	0.13	-0.01	Low
TCGA.V4.A9F2.01A	FALSE	Non-responder	1.9	1.09	0.8	1.26	0.18	-0.04	FALSE	-0.88	1.9	0.1	0.17	0	Low
TCGA.V4.A9F4.01A	FALSE	Non-responder	2.08	0.83	0.93	0.94	0.09	-0.25	FALSE	-1.52	2.08	0.12	0.15	0.02	Low
TCGA.V4.A9F7.01A	FALSE	Non-responder	1.92	0.43	0.96	0.53	0.07	-0.5	FALSE	-1.73	1.92	0.13	0.12	0.02	Low
TCGA.VD.A8K7.01B	FALSE	Non-responder	1.69	0.45	0.98	0.47	-0.17	-0.44	FALSE	-1.81	1.69	0.11	0.11	0.01	Low
TCGA.VD.A8K9.01A	FALSE	Non-responder	1.81	0.84	0.96	0.73	0.31	-0.52	FALSE	-1.67	1.81	0.13	0.12	0	Low
TCGA.VD.A8KA.01B	FALSE	Non-responder	1.96	0.37	0.89	0.57	0.26	-0.47	FALSE	-1.33	1.96	0.12	0.14	0.01	Low
TCGA.VD.A8KB.01A	FALSE	Non-responder	1.97	0.37	0.91	0.57	0.29	-0.5	FALSE	-1.27	1.97	0.13	0.13	0.02	Low
TCGA.VD.A8KE.01A	FALSE	Non-responder	1.87	0.6	0.88	0.78	0.14	-0.42	FALSE	-1.11	1.87	0.1	0.14	0.01	Low
TCGA.VD.A8KG.01A	FALSE	Non-responder	1.72	1.01	0.92	1.19	0.14	0.1	FALSE	-0.95	1.72	0.1	0.13	0.01	Low
TCGA.VD.A8KJ.01A	FALSE	Non-responder	2.08	0.63	0.95	0.67	0.11	-0.44	FALSE	-1.67	2.08	0.13	0.13	0.02	Low
TCGA.VD.A8KL.01A	FALSE	Non-responder	2.07	0.54	0.9	0.76	-0.07	-0.39	FALSE	-1.03	2.07	0.12	0.15	0.02	Low
TCGA.VD.A8KO.01A	FALSE	Non-responder	1.88	0.51	0.97	0.52	-0.03	-0.56	FALSE	-1.87	1.88	0.13	0.11	0.02	Low
TCGA.VD.AA8R.01A	FALSE	Non-responder	1.82	0.46	0.97	0.55	0.81	-0.47	FALSE	-1.47	1.82	0.1	0.14	0.01	Low
TCGA.VD.AA8S.01B	FALSE	Non-responder	2.01	0.64	0.87	0.96	0.1	-0.21	FALSE	-0.85	2.01	0.1	0.16	0.02	Low
TCGA.WC.A87T.01A	FALSE	Non-responder	1.77	0.44	0.97	0.48	0.18	-0.5	FALSE	-1.76	1.77	0.11	0.11	0.02	Low
TCGA.WC.A87W.01A	FALSE	Non-responder	2.19	0.67	0.91	0.77	0.51	-0.36	FALSE	-1.62	2.19	0.12	0.18	0.01	Low
TCGA.WC.A880.01A	FALSE	Non-responder	1.87	0.59	0.94	0.7	-0.06	-0.25	FALSE	-1.49	1.87	0.11	0.12	0.02	Low
TCGA.WC.A881.01A	FALSE	Non-responder	2	0.91	0.91	0.94	0.49	-0.23	FALSE	-1.5	2	0.13	0.13	0.02	Low
TCGA.WC.A885.01A	FALSE	Non-responder	1.87	0.31	0.91	0.56	0	-0.44	FALSE	-1.15	1.87	0.13	0.12	0.01	Low
TCGA.WC.AA9E.01A	FALSE	Non-responder	1.96	1.15	0.92	1.19	0.4	0.12	FALSE	-1.68	1.96	0.14	0.12	0.01	Low
TCGA.YZ.A982.01A	FALSE	Non-responder	1.87	0.78	0.86	0.96	-0.11	-0.41	FALSE	-0.97	1.87	0.11	0.13	0.01	Low
TCGA.YZ.A983.01A	FALSE	Non-responder	1.86	0.73	0.95	0.76	-0.12	-0.37	FALSE	-1.51	1.86	0.13	0.11	0.02	Low
TCGA.YZ.A985.01A	FALSE	Non-responder	1.87	0.69	0.9	1.02	0.6	-0.12	FALSE	-0.98	1.87	0.12	0.13	0.01	Low
TCGA.V3.A9ZX.01A	FALSE	Responder	-1.26	2.21	0.93	2.17	0.92	1.33	TRUE	-1.26	1.74	0.1	0.14	-0.01	High
TCGA.V4.A9E8.01A	FALSE	Responder	-0.45	1.48	0.74	1.94	0.12	0.79	TRUE	-0.45	1.75	0.09	0.15	0	High
TCGA.V4.A9EE.01A	FALSE	Responder	-1.55	1.69	0.93	1.54	0.11	0.82	TRUE	-1.55	1.91	0.12	0.15	-0.01	High
TCGA.V4.A9EL.01A	FALSE	Responder	-1.3	2.51	0.94	2.19	0.91	1.37	TRUE	-1.3	1.58	0.09	0.13	-0.02	High
TCGA.V4.A9EV.01A	FALSE	Responder	-1.01	3.17	0.95	2.84	1.16	2.36	TRUE	-1.01	1.17	0.06	0.12	-0.03	High
TCGA.V4.A9F0.01A	FALSE	Responder	-1.12	1.22	0.91	1.43	0.16	0.34	TRUE	-1.12	2.14	0.11	0.19	0.01	High
TCGA.V4.A9F3.01A	FALSE	Responder	-1.28	2.51	0.93	2.22	0.87	1.89	TRUE	-1.28	1.63	0.09	0.14	-0.02	High
TCGA.VD.A8K8.01A	FALSE	Responder	-1.25	2.27	0.94	2.29	0.85	1.81	TRUE	-1.25	1.53	0.1	0.12	-0.02	High
TCGA.VD.A8KD.01A	FALSE	Responder	-1.14	3.02	0.96	2.59	1.23	1.74	TRUE	-1.14	1.34	0.07	0.13	-0.03	High
TCGA.VD.A8KI.01A	FALSE	Responder	-0.96	0.91	0.85	1.42	0.16	0.5	TRUE	-0.96	1.82	0.11	0.13	0.01	High
TCGA.VD.A8KM.01A	FALSE	Responder	-0.79	2.79	0.92	2.76	1.1	2.16	TRUE	-0.79	1.14	0.05	0.12	-0.03	High
TCGA.VD.AA8N.01A	FALSE	Responder	-0.91	1.68	0.86	1.77	0.02	0.51	TRUE	-0.91	1.81	0.1	0.14	0	High
TCGA.VD.AA8O.01A	FALSE	Responder	-1.04	1.35	0.89	1.68	0.19	0.74	TRUE	-1.04	1.67	0.09	0.14	0	High
TCGA.WC.A888.01A	FALSE	Responder	-0.86	2.71	0.92	2.57	1.01	1.96	TRUE	-0.86	1.36	0.08	0.13	-0.03	High
TCGA.V4.A9ED.01A	FALSE	Responder	-0.79	1.14	0.89	1.47	0.09	0.55	TRUE	-0.79	1.95	0.1	0.17	0.01	Low
TCGA.V4.A9EH.01A	FALSE	Responder	-0.92	1.38	0.89	1.47	0.85	0.55	TRUE	-0.92	1.67	0.1	0.13	-0.01	Low
TCGA.V4.A9EK.01A	FALSE	Responder	-1.53	1.45	0.93	1.48	0.85	0.58	TRUE	-1.53	1.56	0.08	0.13	0	Low
TCGA.VD.A8KN.01A	FALSE	Responder	-1.1	1.98	0.89	2.01	0.76	1.1	TRUE	-1.1	1.66	0.09	0.14	-0.01	Low
TCGA.WC.A884.01A	FALSE	Responder	-0.97	1.24	0.91	1.43	0.12	0.44	TRUE	-0.97	1.93	0.1	0.17	0	Low

## Sheet: S6
Clinical information for analysis GSE39717
MM#	Age at ocular diagnosis	Gender	Eye	Tumor location	Largest tumor diameter (mm)	Tumor thickness (mm)	Pathologic cell type	Scleral Invasion	MFS	status	Gene expression profile	Chr 3 status (aCGH)	Chr 3 status (FISH)	sample
10	41	Male	Right	Posterior	17	10	Mixed	None	89.7	0	Class 1	Disomy	ND	SAMPLE26
18	55	Male	Left	Posterior	12	9.2	Epithelioid	None	67.4	0	Class 1	Disomy	ND	SAMPLE25
23	74	Male	Right	Posterior	20	11	Spindle	None	22.1	1	Class 2	ND	Monosomy	SAMPLE1
38	87	Male	Left	Posterior	15	6.4	Epithelioid	Intrascleral	33.7	1	Class 1	Disomy	Disomy	SAMPLE9
40	76	Male	Left	Posterior	24	12	Mixed	None	13.5	1	Class 2	ND	Monosomy	SAMPLE2
48	50	Male	Left	Anterior	24	9	Spindle	Intrascleral	49.7	0	Class 1	Disomy	Disomy	SAMPLE3
49	65	Female	Right	Posterior	20	12	Spindle	None	50.1	0	Class 1	Disomy	Disomy	SAMPLE4
53	47	Female	Right	Anterior	15	7.8	Mixed	Intrascleral	10.1	0	Class 1	Disomy	ND	SAMPLE20
55	82	Female	Right	Posterior	19	8.6	Epithelioid	Extrascleral	46	0	Class 2	Monosomy	Monosomy	SAMPLE5
57	53	Male	Left	Posterior	22	11.6	Epithelioid	Intrascleral	39.6	0	Class 1	Disomy	ND	SAMPLE17
60	67	Male	Left	Posterior	14	9.5	Epithelioid	None	37.4	1	Class 2	Monosomy	Disomy	SAMPLE6
61	67	Male	Left	Posterior	11	4.2	Mixed	Intrascleral	36.8	0	Class 1	Disomy	Disomy	SAMPLE7
63	42	Male	Right	Posterior	16	15.9	Spindle	None	39.5	0	Class 1	Disomy	ND	SAMPLE8
64	62	Female	Right	Posterior	18	6.1	Spindle	Intrascleral	11.4	0	Class 1	Monosomy	Disomy	SAMPLE10
66	47	Male	Right	Posterior	22	9.2	Mixed	Intrascleral	33.6	0	Class 2	Monosomy	ND	SAMPLE11
68	54	Male	Right	Posterior	15	6.7	Spindle	None	0	0	Class 1	ND	ND	SAMPLE21
70	62	Male	Left	Posterior	24	15.6	Epithelioid	Extrascleral	27.4	1	Class 2	Monosomy	Disomy	SAMPLE22
71	63	Female	Left	Posterior	NA	12.5	Spindle	Intrascleral	0.6	0	Class 2	Monosomy	Monosomy	SAMPLE23
74	77	Male	Right	Posterior	NA	22	Mixed	Intrascleral	24.4	0	Class 1	Disomy	Disomy	SAMPLE18
76	62	Male	Left	Posterior	16	7.3	Epithelioid	Extrascleral	22.2	1	Class 2	Monosomy	ND	SAMPLE12
77	51	Male	Right	Posterior	24	7.9	Mixed	None	25	1	ND	Disomy	ND	SAMPLE27
79	70	Male	Left	Anterior	7	2.2	Mixed	None	15.8	0	Class 2	Monosomy	ND	SAMPLE19
81	65	Male	Left	Anterior	18.9	11.3	Epithelioid	Extrascleral	2	1	Class 2	Disomy	Disomy	SAMPLE28
88	60	Male	Left	Anterior	16	10.6	Epithelioid	None	9.7	0	Class 2	Monosomy	Monosomy	SAMPLE24
90	72	Female	Right	Posterior	19	14	Mixed	Extrascleral	9.5	0	Class 2	Monosomy	ND	SAMPLE13
92	61	Male	Right	Anterior	20	13.4	Epithelioid	Intrascleral	8	0	Class 1	Disomy	ND	SAMPLE14
93	57	Male	Left	Anterior	17	10.5	Epithelioid	Extrascleral	1.1	0	Class 2	Monosomy	Monosomy	SAMPLE15
94	63	Male	Left	Posterior	18	9.7	Spindle	None	1.3	0	Class 1	Disomy	ND	SAMPLE16
100	68	Male	Right	Anterior	18.4	12.3	Epithelioid	None	1.3	0	ND	ND	ND	SAMPLE40
101	66	Female	Left	Posterior	15	6.4	Spindle	None	1.4	0	ND	ND	ND	SAMPLE30
24	63	Female	Right	Posterior	20	12	Spindle	None	68.1	0	Class 1	ND	Disomy	SAMPLE41

## Sheet: S7
phenodata of GSE22138
ID	title	geo_accession	status	submission_date	last_update_date	type	channel_count	source_name_ch1	organism_ch1	characteristics_ch1	characteristics_ch1.1	characteristics_ch1.2	characteristics_ch1.3	characteristics_ch1.4	characteristics_ch1.5	characteristics_ch1.6	characteristics_ch1.7	characteristics_ch1.8	characteristics_ch1.9	characteristics_ch1.10	characteristics_ch1.11	characteristics_ch1.12	molecule_ch1	extract_protocol_ch1	label_ch1	label_protocol_ch1	taxid_ch1	hyb_protocol	scan_protocol	description	data_processing	platform_id	contact_name	contact_email	contact_institute	contact_address	contact_city	contact_zip/postal_code	contact_country	supplementary_file	data_row_count	age:ch1	chromosome 3 status:ch1	extrascleral extension:ch1	eye:ch1	gender:ch1	metastasis:ch1	months to endpoint:ch1	retinal detachment:ch1
GSM550623	Uveal Melanoma MU1	GSM550623	Public on Dec 14 2010	Jun 04 2010	Dec 14 2010	RNA	1	Eye	Homo sapiens	tissue: Uveal Melanoma (eye)	age: 76.54	gender: female	eye: right	tumor location: NA	tumor diameter (mm): NA	tumor thickness (mm): 12.2	tumor cell type: mixed	retinal detachment: no	extrascleral extension: NA	chromosome 3 status: NA	months to endpoint: 73	metastasis: no	total RNA	Trizol extraction of total RNA was performed according to the manufacturer's instructions. A cleanup with RNAII Nucleospin was conducted according Macherey Nagel recommendations	Biotin	Biotinylated cRNA were prepared according to the Affymetrix two round amplification protocol from 100ng total RNA (Expression Analysis Technical Manual, 2001, Affymetrix).	9606	Following fragmentation, 10 ug of labelled cRNA were hybridized for 16 hr on GeneChip Human Genome Array. GeneChips were washed and stained in the Affymetrix Fluidics Station FS450.	GeneChips were scanned using Affymetrix GeneChip GCS3000 scanner.	Gene expression data from Uveal Melanoma	Raw data were controlled using Genechip Operating Software and Affymetrix MAS5 algorithm to control the quality of hybridization and synthesis steps. Raw data were analysed using R/Bioconductor and normalized by GC-RMA method.	GPL570	Cecile,,Laurent	cecile.laurent@curie.fr	Institut Curie	26 rue d'ulm	Paris Cedex 05	75248	France	ftp://ftp.ncbi.nlm.nih.gov/geo/samples/GSM550nnn/GSM550623/suppl/GSM550623.CEL.gz	54675	76.54	NA	NA	right	female	no	73	no
GSM550624	Uveal Melanoma MU3	GSM550624	Public on Dec 14 2010	Jun 04 2010	Dec 14 2010	RNA	1	Eye	Homo sapiens	tissue: Uveal Melanoma (eye)	age: 67.57	gender: male	eye: left	tumor location: on equator	tumor diameter (mm): 10	tumor thickness (mm): 11.3	tumor cell type: epithelioid	retinal detachment: NA	extrascleral extension: NA	chromosome 3 status: NA	months to endpoint: 32.13	metastasis: yes	total RNA	Trizol extraction of total RNA was performed according to the manufacturer's instructions. A cleanup with RNAII Nucleospin was conducted according Macherey Nagel recommendations	Biotin	Biotinylated cRNA were prepared according to the Affymetrix two round amplification protocol from 100ng total RNA (Expression Analysis Technical Manual, 2001, Affymetrix).	9606	Following fragmentation, 10 ug of labelled cRNA were hybridized for 16 hr on GeneChip Human Genome Array. GeneChips were washed and stained in the Affymetrix Fluidics Station FS450.	GeneChips were scanned using Affymetrix GeneChip GCS3000 scanner.	Gene expression data from Uveal Melanoma	Raw data were controlled using Genechip Operating Software and Affymetrix MAS5 algorithm to control the quality of hybridization and synthesis steps. Raw data were analysed using R/Bioconductor and normalized by GC-RMA method.	GPL570	Cecile,,Laurent	cecile.laurent@curie.fr	Institut Curie	26 rue d'ulm	Paris Cedex 05	75248	France	ftp://ftp.ncbi.nlm.nih.gov/geo/samples/GSM550nnn/GSM550624/suppl/GSM550624.CEL.gz	54675	67.57	NA	NA	left	male	yes	32.13	NA
GSM550625	Uveal Melanoma MU4	GSM550625	Public on Dec 14 2010	Jun 04 2010	Dec 14 2010	RNA	1	Eye	Homo sapiens	tissue: Uveal Melanoma (eye)	age: 61.82	gender: male	eye: right	tumor location: on equator	tumor diameter (mm): 20	tumor thickness (mm): 10.9	tumor cell type: NA	retinal detachment: yes	extrascleral extension: NA	chromosome 3 status: NA	months to endpoint: 0.39	metastasis: yes	total RNA	Trizol extraction of total RNA was performed according to the manufacturer's instructions. A cleanup with RNAII Nucleospin was conducted according Macherey Nagel recommendations	Biotin	Biotinylated cRNA were prepared according to the Affymetrix two round amplification protocol from 100ng total RNA (Expression Analysis Technical Manual, 2001, Affymetrix).	9606	Following fragmentation, 10 ug of labelled cRNA were hybridized for 16 hr on GeneChip Human Genome Array. GeneChips were washed and stained in the Affymetrix Fluidics Station FS450.	GeneChips were scanned using Affymetrix GeneChip GCS3000 scanner.	Gene expression data from Uveal Melanoma	Raw data were controlled using Genechip Operating Software and Affymetrix MAS5 algorithm to control the quality of hybridization and synthesis steps. Raw data were analysed using R/Bioconductor and normalized by GC-RMA method.	GPL570	Cecile,,Laurent	cecile.laurent@curie.fr	Institut Curie	26 rue d'ulm	Paris Cedex 05	75248	France	ftp://ftp.ncbi.nlm.nih.gov/geo/samples/GSM550nnn/GSM550625/suppl/GSM550625.CEL.gz	54675	61.82	NA	NA	right	male	yes	0.39	yes
GSM550626	Uveal Melanoma MU6	GSM550626	Public on Dec 14 2010	Jun 04 2010	Dec 14 2010	RNA	1	Eye	Homo sapiens	tissue: Uveal Melanoma (eye)	age: 46.4	gender: male	eye: right	tumor location: posterior to equator	tumor diameter (mm): 15	tumor thickness (mm): 14	tumor cell type: mixed	retinal detachment: yes	extrascleral extension: yes	chromosome 3 status: disomy	months to endpoint: 64	metastasis: yes	total RNA	Trizol extraction of total RNA was performed according to the manufacturer's instructions. A cleanup with RNAII Nucleospin was conducted according Macherey Nagel recommendations	Biotin	Biotinylated cRNA were prepared according to the Affymetrix two round amplification protocol from 100ng total RNA (Expression Analysis Technical Manual, 2001, Affymetrix).	9606	Following fragmentation, 10 ug of labelled cRNA were hybridized for 16 hr on GeneChip Human Genome Array. GeneChips were washed and stained in the Affymetrix Fluidics Station FS450.	GeneChips were scanned using Affymetrix GeneChip GCS3000 scanner.	Gene expression data from Uveal Melanoma	Raw data were controlled using Genechip Operating Software and Affymetrix MAS5 algorithm to control the quality of hybridization and synthesis steps. Raw data were analysed using R/Bioconductor and normalized by GC-RMA method.	GPL570	Cecile,,Laurent	cecile.laurent@curie.fr	Institut Curie	26 rue d'ulm	Paris Cedex 05	75248	France	ftp://ftp.ncbi.nlm.nih.gov/geo/samples/GSM550nnn/GSM550626/suppl/GSM550626.CEL.gz	54675	46.4	disomy	yes	right	male	yes	64	yes
GSM550627	Uveal Melanoma MU8	GSM550627	Public on Dec 14 2010	Jun 04 2010	Dec 14 2010	RNA	1	Eye	Homo sapiens	tissue: Uveal Melanoma (eye)	age: 84.99	gender: male	eye: right	tumor location: anterior to equator	tumor diameter (mm): 20	tumor thickness (mm): 7	tumor cell type: NA	retinal detachment: no	extrascleral extension: NA	chromosome 3 status: monosomy	months to endpoint: 67.81	metastasis: no	total RNA	Trizol extraction of total RNA was performed according to the manufacturer's instructions. A cleanup with RNAII Nucleospin was conducted according Macherey Nagel recommendations	Biotin	Biotinylated cRNA were prepared according to the Affymetrix two round amplification protocol from 100ng total RNA (Expression Analysis Technical Manual, 2001, Affymetrix).	9606	Following fragmentation, 10 ug of labelled cRNA were hybridized for 16 hr on GeneChip Human Genome Array. GeneChips were washed and stained in the Affymetrix Fluidics Station FS450.	GeneChips were scanned using Affymetrix GeneChip GCS3000 scanner.	Gene expression data from Uveal Melanoma	Raw data were controlled using Genechip Operating Software and Affymetrix MAS5 algorithm to control the quality of hybridization and synthesis steps. Raw data were analysed using R/Bioconductor and normalized by GC-RMA method.	GPL570	Cecile,,Laurent	cecile.laurent@curie.fr	Institut Curie	26 rue d'ulm	Paris Cedex 05	75248	France	ftp://ftp.ncbi.nlm.nih.gov/geo/samples/GSM550nnn/GSM550627/suppl/GSM550627.CEL.gz	54675	84.99	monosomy	NA	right	male	no	67.81	no
GSM550628	Uveal Melanoma MU9	GSM550628	Public on Dec 14 2010	Jun 04 2010	Dec 14 2010	RNA	1	Eye	Homo sapiens	tissue: Uveal Melanoma (eye)	age: 50.64	gender: female	eye: left	tumor location: on equator	tumor diameter (mm): NA	tumor thickness (mm): 8.3	tumor cell type: mixed	retinal detachment: yes	extrascleral extension: no	chromosome 3 status: disomy	months to endpoint: 86.08	metastasis: no	total RNA	Trizol extraction of total RNA was performed according to the manufacturer's instructions. A cleanup with RNAII Nucleospin was conducted according Macherey Nagel recommendations	Biotin	Biotinylated cRNA were prepared according to the Affymetrix two round amplification protocol from 100ng total RNA (Expression Analysis Technical Manual, 2001, Affymetrix).	9606	Following fragmentation, 10 ug of labelled cRNA were hybridized for 16 hr on GeneChip Human Genome Array. GeneChips were washed and stained in the Affymetrix Fluidics Station FS450.	GeneChips were scanned using Affymetrix GeneChip GCS3000 scanner.	Gene expression data from Uveal Melanoma	Raw data were controlled using Genechip Operating Software and Affymetrix MAS5 algorithm to control the quality of hybridization and synthesis steps. Raw data were analysed using R/Bioconductor and normalized by GC-RMA method.	GPL570	Cecile,,Laurent	cecile.laurent@curie.fr	Institut Curie	26 rue d'ulm	Paris Cedex 05	75248	France	ftp://ftp.ncbi.nlm.nih.gov/geo/samples/GSM550nnn/GSM550628/suppl/GSM550628.CEL.gz	54675	50.64	disomy	no	left	female	no	86.08	yes
GSM550629	Uveal Melanoma MU10	GSM550629	Public on Dec 14 2010	Jun 04 2010	Dec 14 2010	RNA	1	Eye	Homo sapiens	tissue: Uveal Melanoma (eye)	age: 38.67	gender: male	eye: right	tumor location: on equator	tumor diameter (mm): 11	tumor thickness (mm): 10	tumor cell type: NA	retinal detachment: yes	extrascleral extension: no	chromosome 3 status: disomy	months to endpoint: 85.09	metastasis: no	total RNA	Trizol extraction of total RNA was performed according to the manufacturer's instructions. A cleanup with RNAII Nucleospin was conducted according Macherey Nagel recommendations	Biotin	Biotinylated cRNA were prepared according to the Affymetrix two round amplification protocol from 100ng total RNA (Expression Analysis Technical Manual, 2001, Affymetrix).	9606	Following fragmentation, 10 ug of labelled cRNA were hybridized for 16 hr on GeneChip Human Genome Array. GeneChips were washed and stained in the Affymetrix Fluidics Station FS450.	GeneChips were scanned using Affymetrix GeneChip GCS3000 scanner.	Gene expression data from Uveal Melanoma	Raw data were controlled using Genechip Operating Software and Affymetrix MAS5 algorithm to control the quality of hybridization and synthesis steps. Raw data were analysed using R/Bioconductor and normalized by GC-RMA method.	GPL570	Cecile,,Laurent	cecile.laurent@curie.fr	Institut Curie	26 rue d'ulm	Paris Cedex 05	75248	France	ftp://ftp.ncbi.nlm.nih.gov/geo/samples/GSM550nnn/GSM550629/suppl/GSM550629.CEL.gz	54675	38.67	disomy	no	right	male	no	85.09	yes
GSM550630	Uveal Melanoma MU11	GSM550630	Public on Dec 14 2010	Jun 04 2010	Dec 14 2010	RNA	1	Eye	Homo sapiens	tissue: Uveal Melanoma (eye)	age: 59.1	gender: male	eye: right	tumor location: on equator	tumor diameter (mm): 20.9	tumor thickness (mm): 10.5	tumor cell type: epithelioid	retinal detachment: yes	extrascleral extension: no	chromosome 3 status: monosomy	months to endpoint: 6.14	metastasis: yes	total RNA	Trizol extraction of total RNA was performed according to the manufacturer's instructions. A cleanup with RNAII Nucleospin was conducted according Macherey Nagel recommendations	Biotin	Biotinylated cRNA were prepared according to the Affymetrix two round amplification protocol from 100ng total RNA (Expression Analysis Technical Manual, 2001, Affymetrix).	9606	Following fragmentation, 10 ug of labelled cRNA were hybridized for 16 hr on GeneChip Human Genome Array. GeneChips were washed and stained in the Affymetrix Fluidics Station FS450.	GeneChips were scanned using Affymetrix GeneChip GCS3000 scanner.	Gene expression data from Uveal Melanoma	Raw data were controlled using Genechip Operating Software and Affymetrix MAS5 algorithm to control the quality of hybridization and synthesis steps. Raw data were analysed using R/Bioconductor and normalized by GC-RMA method.	GPL570	Cecile,,Laurent	cecile.laurent@curie.fr	Institut Curie	26 rue d'ulm	Paris Cedex 05	75248	France	ftp://ftp.ncbi.nlm.nih.gov/geo/samples/GSM550nnn/GSM550630/suppl/GSM550630.CEL.gz	54675	59.1	monosomy	no	right	male	yes	6.14	yes
GSM550631	Uveal Melanoma MU12	GSM550631	Public on Dec 14 2010	Jun 04 2010	Dec 14 2010	RNA	1	Eye	Homo sapiens	tissue: Uveal Melanoma (eye)	age: 52.33	gender: male	eye: left	tumor location: on equator	tumor diameter (mm): 19.4	tumor thickness (mm): 13.7	tumor cell type: mixed	retinal detachment: yes	extrascleral extension: no	chromosome 3 status: disomy	months to endpoint: 55.79	metastasis: no	total RNA	Trizol extraction of total RNA was performed according to the manufacturer's instructions. A cleanup with RNAII Nucleospin was conducted according Macherey Nagel recommendations	Biotin	Biotinylated cRNA were prepared according to the Affymetrix two round amplification protocol from 100ng total RNA (Expression Analysis Technical Manual, 2001, Affymetrix).	9606	Following fragmentation, 10 ug of labelled cRNA were hybridized for 16 hr on GeneChip Human Genome Array. GeneChips were washed and stained in the Affymetrix Fluidics Station FS450.	GeneChips were scanned using Affymetrix GeneChip GCS3000 scanner.	Gene expression data from Uveal Melanoma	Raw data were controlled using Genechip Operating Software and Affymetrix MAS5 algorithm to control the quality of hybridization and synthesis steps. Raw data were analysed using R/Bioconductor and normalized by GC-RMA method.	GPL570	Cecile,,Laurent	cecile.laurent@curie.fr	Institut Curie	26 rue d'ulm	Paris Cedex 05	75248	France	ftp://ftp.ncbi.nlm.nih.gov/geo/samples/GSM550nnn/GSM550631/suppl/GSM550631.CEL.gz	54675	52.33	disomy	no	left	male	no	55.79	yes
GSM550632	Uveal Melanoma MU13	GSM550632	Public on Dec 14 2010	Jun 04 2010	Dec 14 2010	RNA	1	Eye	Homo sapiens	tissue: Uveal Melanoma (eye)	age: 32.94	gender: male	eye: right	tumor location: on equator	tumor diameter (mm): 15	tumor thickness (mm): 10.1	tumor cell type: mixed	retinal detachment: no	extrascleral extension: no	chromosome 3 status: disomy	months to endpoint: 55.23	metastasis: no	total RNA	Trizol extraction of total RNA was performed according to the manufacturer's instructions. A cleanup with RNAII Nucleospin was conducted according Macherey Nagel recommendations	Biotin	Biotinylated cRNA were prepared according to the Affymetrix two round amplification protocol from 100ng total RNA (Expression Analysis Technical Manual, 2001, Affymetrix).	9606	Following fragmentation, 10 ug of labelled cRNA were hybridized for 16 hr on GeneChip Human Genome Array. GeneChips were washed and stained in the Affymetrix Fluidics Station FS450.	GeneChips were scanned using Affymetrix GeneChip GCS3000 scanner.	Gene expression data from Uveal Melanoma	Raw data were controlled using Genechip Operating Software and Affymetrix MAS5 algorithm to control the quality of hybridization and synthesis steps. Raw data were analysed using R/Bioconductor and normalized by GC-RMA method.	GPL570	Cecile,,Laurent	cecile.laurent@curie.fr	Institut Curie	26 rue d'ulm	Paris Cedex 05	75248	France	ftp://ftp.ncbi.nlm.nih.gov/geo/samples/GSM550nnn/GSM550632/suppl/GSM550632.CEL.gz	54675	32.94	disomy	no	right	male	no	55.23	no
GSM550633	Uveal Melanoma MU14	GSM550633	Public on Dec 14 2010	Jun 04 2010	Dec 14 2010	RNA	1	Eye	Homo sapiens	tissue: Uveal Melanoma (eye)	age: 70.09	gender: male	eye: right	tumor location: on equator	tumor diameter (mm): 13	tumor thickness (mm): 13.8	tumor cell type: mixed	retinal detachment: yes	extrascleral extension: no	chromosome 3 status: monosomy	months to endpoint: 7.92	metastasis: yes	total RNA	Trizol extraction of total RNA was performed according to the manufacturer's instructions. A cleanup with RNAII Nucleospin was conducted according Macherey Nagel recommendations	Biotin	Biotinylated cRNA were prepared according to the Affymetrix two round amplification protocol from 100ng total RNA (Expression Analysis Technical Manual, 2001, Affymetrix).	9606	Following fragmentation, 10 ug of labelled cRNA were hybridized for 16 hr on GeneChip Human Genome Array. GeneChips were washed and stained in the Affymetrix Fluidics Station FS450.	GeneChips were scanned using Affymetrix GeneChip GCS3000 scanner.	Gene expression data from Uveal Melanoma	Raw data were controlled using Genechip Operating Software and Affymetrix MAS5 algorithm to control the quality of hybridization and synthesis steps. Raw data were analysed using R/Bioconductor and normalized by GC-RMA method.	GPL570	Cecile,,Laurent	cecile.laurent@curie.fr	Institut Curie	26 rue d'ulm	Paris Cedex 05	75248	France	ftp://ftp.ncbi.nlm.nih.gov/geo/samples/GSM550nnn/GSM550633/suppl/GSM550633.CEL.gz	54675	70.09	monosomy	no	right	male	yes	7.92	yes
GSM550634	Uveal Melanoma MU38	GSM550634	Public on Dec 14 2010	Jun 04 2010	Dec 14 2010	RNA	1	Eye	Homo sapiens	tissue: Uveal Melanoma (eye)	age: 60.8	gender: male	eye: left	tumor location: posterior to equator	tumor diameter (mm): 15	tumor thickness (mm): 7.5	tumor cell type: mixed	retinal detachment: yes	extrascleral extension: NA	chromosome 3 status: NA	months to endpoint: 16.76	metastasis: yes	total RNA	Trizol extraction of total RNA was performed according to the manufacturer's instructions. A cleanup with RNAII Nucleospin was conducted according Macherey Nagel recommendations	Biotin	Biotinylated cRNA were prepared according to the Affymetrix two round amplification protocol from 100ng total RNA (Expression Analysis Technical Manual, 2001, Affymetrix).	9606	Following fragmentation, 10 ug of labelled cRNA were hybridized for 16 hr on GeneChip Human Genome Array. GeneChips were washed and stained in the Affymetrix Fluidics Station FS450.	GeneChips were scanned using Affymetrix GeneChip GCS3000 scanner.	Gene expression data from Uveal Melanoma	Raw data were controlled using Genechip Operating Software and Affymetrix MAS5 algorithm to control the quality of hybridization and synthesis steps. Raw data were analysed using R/Bioconductor and normalized by GC-RMA method.	GPL570	Cecile,,Laurent	cecile.laurent@curie.fr	Institut Curie	26 rue d'ulm	Paris Cedex 05	75248	France	ftp://ftp.ncbi.nlm.nih.gov/geo/samples/GSM550nnn/GSM550634/suppl/GSM550634.CEL.gz	54675	60.8	NA	NA	left	male	yes	16.76	yes
GSM550635	Uveal Melanoma MU40	GSM550635	Public on Dec 14 2010	Jun 04 2010	Dec 14 2010	RNA	1	Eye	Homo sapiens	tissue: Uveal Melanoma (eye)	age: 54.81	gender: female	eye: left	tumor location: on equator	tumor diameter (mm): 13	tumor thickness (mm): 12.7	tumor cell type: mixed	retinal detachment: yes	extrascleral extension: yes	chromosome 3 status: monosomy	months to endpoint: 0.92	metastasis: yes	total RNA	Trizol extraction of total RNA was performed according to the manufacturer's instructions. A cleanup with RNAII Nucleospin was conducted according Macherey Nagel recommendations	Biotin	Biotinylated cRNA were prepared according to the Affymetrix two round amplification protocol from 100ng total RNA (Expression Analysis Technical Manual, 2001, Affymetrix).	9606	Following fragmentation, 10 ug of labelled cRNA were hybridized for 16 hr on GeneChip Human Genome Array. GeneChips were washed and stained in the Affymetrix Fluidics Station FS450.	GeneChips were scanned using Affymetrix GeneChip GCS3000 scanner.	Gene expression data from Uveal Melanoma	Raw data were controlled using Genechip Operating Software and Affymetrix MAS5 algorithm to control the quality of hybridization and synthesis steps. Raw data were analysed using R/Bioconductor and normalized by GC-RMA method.	GPL570	Cecile,,Laurent	cecile.laurent@curie.fr	Institut Curie	26 rue d'ulm	Paris Cedex 05	75248	France	ftp://ftp.ncbi.nlm.nih.gov/geo/samples/GSM550nnn/GSM550635/suppl/GSM550635.CEL.gz	54675	54.81	monosomy	yes	left	female	yes	0.92	yes
GSM550636	Uveal Melanoma MU44	GSM550636	Public on Dec 14 2010	Jun 04 2010	Dec 14 2010	RNA	1	Eye	Homo sapiens	tissue: Uveal Melanoma (eye)	age: 75.66	gender: male	eye: left	tumor location: on equator	tumor diameter (mm): 15	tumor thickness (mm): 12.4	tumor cell type: NA	retinal detachment: yes	extrascleral extension: no	chromosome 3 status: NA	months to endpoint: 6.54	metastasis: yes	total RNA	Trizol extraction of total RNA was performed according to the manufacturer's instructions. A cleanup with RNAII Nucleospin was conducted according Macherey Nagel recommendations	Biotin	Biotinylated cRNA were prepared according to the Affymetrix two round amplification protocol from 100ng total RNA (Expression Analysis Technical Manual, 2001, Affymetrix).	9606	Following fragmentation, 10 ug of labelled cRNA were hybridized for 16 hr on GeneChip Human Genome Array. GeneChips were washed and stained in the Affymetrix Fluidics Station FS450.	GeneChips were scanned using Affymetrix GeneChip GCS3000 scanner.	Gene expression data from Uveal Melanoma	Raw data were controlled using Genechip Operating Software and Affymetrix MAS5 algorithm to control the quality of hybridization and synthesis steps. Raw data were analysed using R/Bioconductor and normalized by GC-RMA method.	GPL570	Cecile,,Laurent	cecile.laurent@curie.fr	Institut Curie	26 rue d'ulm	Paris Cedex 05	75248	France	ftp://ftp.ncbi.nlm.nih.gov/geo/samples/GSM550nnn/GSM550636/suppl/GSM550636.CEL.gz	54675	75.66	NA	no	left	male	yes	6.54	yes
GSM550637	Uveal Melanoma MU47	GSM550637	Public on Dec 14 2010	Jun 04 2010	Dec 14 2010	RNA	1	Eye	Homo sapiens	tissue: Uveal Melanoma (eye)	age: 45.97	gender: male	eye: right	tumor location: on equator	tumor diameter (mm): 9	tumor thickness (mm): 10.4	tumor cell type: mixed	retinal detachment: yes	extrascleral extension: no	chromosome 3 status: partial monosomy	months to endpoint: 89.82	metastasis: no	total RNA	Trizol extraction of total RNA was performed according to the manufacturer's instructions. A cleanup with RNAII Nucleospin was conducted according Macherey Nagel recommendations	Biotin	Biotinylated cRNA were prepared according to the Affymetrix two round amplification protocol from 100ng total RNA (Expression Analysis Technical Manual, 2001, Affymetrix).	9606	Following fragmentation, 10 ug of labelled cRNA were hybridized for 16 hr on GeneChip Human Genome Array. GeneChips were washed and stained in the Affymetrix Fluidics Station FS450.	GeneChips were scanned using Affymetrix GeneChip GCS3000 scanner.	Gene expression data from Uveal Melanoma	Raw data were controlled using Genechip Operating Software and Affymetrix MAS5 algorithm to control the quality of hybridization and synthesis steps. Raw data were analysed using R/Bioconductor and normalized by GC-RMA method.	GPL570	Cecile,,Laurent	cecile.laurent@curie.fr	Institut Curie	26 rue d'ulm	Paris Cedex 05	75248	France	ftp://ftp.ncbi.nlm.nih.gov/geo/samples/GSM550nnn/GSM550637/suppl/GSM550637.CEL.gz	54675	45.97	partial monosomy	no	right	male	no	89.82	yes
GSM550638	Uveal Melanoma MU48	GSM550638	Public on Dec 14 2010	Jun 04 2010	Dec 14 2010	RNA	1	Eye	Homo sapiens	tissue: Uveal Melanoma (eye)	age: 51.61	gender: female	eye: left	tumor location: on equator	tumor diameter (mm): 12	tumor thickness (mm): 10.5	tumor cell type: epithelioid	retinal detachment: no	extrascleral extension: no	chromosome 3 status: monosomy	months to endpoint: 21.78	metastasis: yes	total RNA	Trizol extraction of total RNA was performed according to the manufacturer's instructions. A cleanup with RNAII Nucleospin was conducted according Macherey Nagel recommendations	Biotin	Biotinylated cRNA were prepared according to the Affymetrix two round amplification protocol from 100ng total RNA (Expression Analysis Technical Manual, 2001, Affymetrix).	9606	Following fragmentation, 10 ug of labelled cRNA were hybridized for 16 hr on GeneChip Human Genome Array. GeneChips were washed and stained in the Affymetrix Fluidics Station FS450.	GeneChips were scanned using Affymetrix GeneChip GCS3000 scanner.	Gene expression data from Uveal Melanoma	Raw data were controlled using Genechip Operating Software and Affymetrix MAS5 algorithm to control the quality of hybridization and synthesis steps. Raw data were analysed using R/Bioconductor and normalized by GC-RMA method.	GPL570	Cecile,,Laurent	cecile.laurent@curie.fr	Institut Curie	26 rue d'ulm	Paris Cedex 05	75248	France	ftp://ftp.ncbi.nlm.nih.gov/geo/samples/GSM550nnn/GSM550638/suppl/GSM550638.CEL.gz	54675	51.61	monosomy	no	left	female	yes	21.78	no
GSM550639	Uveal Melanoma MU62	GSM550639	Public on Dec 14 2010	Jun 04 2010	Dec 14 2010	RNA	1	Eye	Homo sapiens	tissue: Uveal Melanoma (eye)	age: 66.2	gender: female	eye: right	tumor location: NA	tumor diameter (mm): 9	tumor thickness (mm): 8.9	tumor cell type: mixed	retinal detachment: no	extrascleral extension: NA	chromosome 3 status: NA	months to endpoint: 120.64	metastasis: no	total RNA	Trizol extraction of total RNA was performed according to the manufacturer's instructions. A cleanup with RNAII Nucleospin was conducted according Macherey Nagel recommendations	Biotin	Biotinylated cRNA were prepared according to the Affymetrix two round amplification protocol from 100ng total RNA (Expression Analysis Technical Manual, 2001, Affymetrix).	9606	Following fragmentation, 10 ug of labelled cRNA were hybridized for 16 hr on GeneChip Human Genome Array. GeneChips were washed and stained in the Affymetrix Fluidics Station FS450.	GeneChips were scanned using Affymetrix GeneChip GCS3000 scanner.	Gene expression data from Uveal Melanoma	Raw data were controlled using Genechip Operating Software and Affymetrix MAS5 algorithm to control the quality of hybridization and synthesis steps. Raw data were analysed using R/Bioconductor and normalized by GC-RMA method.	GPL570	Cecile,,Laurent	cecile.laurent@curie.fr	Institut Curie	26 rue d'ulm	Paris Cedex 05	75248	France	ftp://ftp.ncbi.nlm.nih.gov/geo/samples/GSM550nnn/GSM550639/suppl/GSM550639.CEL.gz	54675	66.2	NA	NA	right	female	no	120.64	no
GSM550640	Uveal Melanoma MU63	GSM550640	Public on Dec 14 2010	Jun 04 2010	Dec 14 2010	RNA	1	Eye	Homo sapiens	tissue: Uveal Melanoma (eye)	age: 51.95	gender: female	eye: left	tumor location: on equator	tumor diameter (mm): 23	tumor thickness (mm): 15	tumor cell type: mixed	retinal detachment: no	extrascleral extension: no	chromosome 3 status: disomy	months to endpoint: 95.47	metastasis: no	total RNA	Trizol extraction of total RNA was performed according to the manufacturer's instructions. A cleanup with RNAII Nucleospin was conducted according Macherey Nagel recommendations	Biotin	Biotinylated cRNA were prepared according to the Affymetrix two round amplification protocol from 100ng total RNA (Expression Analysis Technical Manual, 2001, Affymetrix).	9606	Following fragmentation, 10 ug of labelled cRNA were hybridized for 16 hr on GeneChip Human Genome Array. GeneChips were washed and stained in the Affymetrix Fluidics Station FS450.	GeneChips were scanned using Affymetrix GeneChip GCS3000 scanner.	Gene expression data from Uveal Melanoma	Raw data were controlled using Genechip Operating Software and Affymetrix MAS5 algorithm to control the quality of hybridization and synthesis steps. Raw data were analysed using R/Bioconductor and normalized by GC-RMA method.	GPL570	Cecile,,Laurent	cecile.laurent@curie.fr	Institut Curie	26 rue d'ulm	Paris Cedex 05	75248	France	ftp://ftp.ncbi.nlm.nih.gov/geo/samples/GSM550nnn/GSM550640/suppl/GSM550640.CEL.gz	54675	51.95	disomy	no	left	female	no	95.47	no
GSM550641	Uveal Melanoma MU64	GSM550641	Public on Dec 14 2010	Jun 04 2010	Dec 14 2010	RNA	1	Eye	Homo sapiens	tissue: Uveal Melanoma (eye)	age: 59.41	gender: male	eye: left	tumor location: posterior to equator	tumor diameter (mm): NA	tumor thickness (mm): 12	tumor cell type: NA	retinal detachment: no	extrascleral extension: no	chromosome 3 status: monosomy	months to endpoint: 25.13	metastasis: no	total RNA	Trizol extraction of total RNA was performed according to the manufacturer's instructions. A cleanup with RNAII Nucleospin was conducted according Macherey Nagel recommendations	Biotin	Biotinylated cRNA were prepared according to the Affymetrix two round amplification protocol from 100ng total RNA (Expression Analysis Technical Manual, 2001, Affymetrix).	9606	Following fragmentation, 10 ug of labelled cRNA were hybridized for 16 hr on GeneChip Human Genome Array. GeneChips were washed and stained in the Affymetrix Fluidics Station FS450.	GeneChips were scanned using Affymetrix GeneChip GCS3000 scanner.	Gene expression data from Uveal Melanoma	Raw data were controlled using Genechip Operating Software and Affymetrix MAS5 algorithm to control the quality of hybridization and synthesis steps. Raw data were analysed using R/Bioconductor and normalized by GC-RMA method.	GPL570	Cecile,,Laurent	cecile.laurent@curie.fr	Institut Curie	26 rue d'ulm	Paris Cedex 05	75248	France	ftp://ftp.ncbi.nlm.nih.gov/geo/samples/GSM550nnn/GSM550641/suppl/GSM550641.CEL.gz	54675	59.41	monosomy	no	left	male	no	25.13	no
GSM550642	Uveal Melanoma MU65	GSM550642	Public on Dec 14 2010	Jun 04 2010	Dec 14 2010	RNA	1	Eye	Homo sapiens	tissue: Uveal Melanoma (eye)	age: 68.51	gender: male	eye: left	tumor location: NA	tumor diameter (mm): 10	tumor thickness (mm): 8.9	tumor cell type: NA	retinal detachment: yes	extrascleral extension: no	chromosome 3 status: monosomy	months to endpoint: 60.06	metastasis: no	total RNA	Trizol extraction of total RNA was performed according to the manufacturer's instructions. A cleanup with RNAII Nucleospin was conducted according Macherey Nagel recommendations	Biotin	Biotinylated cRNA were prepared according to the Affymetrix two round amplification protocol from 100ng total RNA (Expression Analysis Technical Manual, 2001, Affymetrix).	9606	Following fragmentation, 10 ug of labelled cRNA were hybridized for 16 hr on GeneChip Human Genome Array. GeneChips were washed and stained in the Affymetrix Fluidics Station FS450.	GeneChips were scanned using Affymetrix GeneChip GCS3000 scanner.	Gene expression data from Uveal Melanoma	Raw data were controlled using Genechip Operating Software and Affymetrix MAS5 algorithm to control the quality of hybridization and synthesis steps. Raw data were analysed using R/Bioconductor and normalized by GC-RMA method.	GPL570	Cecile,,Laurent	cecile.laurent@curie.fr	Institut Curie	26 rue d'ulm	Paris Cedex 05	75248	France	ftp://ftp.ncbi.nlm.nih.gov/geo/samples/GSM550nnn/GSM550642/suppl/GSM550642.CEL.gz	54675	68.51	monosomy	no	left	male	no	60.06	yes
GSM550643	Uveal Melanoma MU66	GSM550643	Public on Dec 14 2010	Jun 04 2010	Dec 14 2010	RNA	1	Eye	Homo sapiens	tissue: Uveal Melanoma (eye)	age: 65.62	gender: male	eye: right	tumor location: on equator	tumor diameter (mm): 16	tumor thickness (mm): 13	tumor cell type: NA	retinal detachment: yes	extrascleral extension: no	chromosome 3 status: monosomy	months to endpoint: 14.16	metastasis: no	total RNA	Trizol extraction of total RNA was performed according to the manufacturer's instructions. A cleanup with RNAII Nucleospin was conducted according Macherey Nagel recommendations	Biotin	Biotinylated cRNA were prepared according to the Affymetrix two round amplification protocol from 100ng total RNA (Expression Analysis Technical Manual, 2001, Affymetrix).	9606	Following fragmentation, 10 ug of labelled cRNA were hybridized for 16 hr on GeneChip Human Genome Array. GeneChips were washed and stained in the Affymetrix Fluidics Station FS450.	GeneChips were scanned using Affymetrix GeneChip GCS3000 scanner.	Gene expression data from Uveal Melanoma	Raw data were controlled using Genechip Operating Software and Affymetrix MAS5 algorithm to control the quality of hybridization and synthesis steps. Raw data were analysed using R/Bioconductor and normalized by GC-RMA method.	GPL570	Cecile,,Laurent	cecile.laurent@curie.fr	Institut Curie	26 rue d'ulm	Paris Cedex 05	75248	France	ftp://ftp.ncbi.nlm.nih.gov/geo/samples/GSM550nnn/GSM550643/suppl/GSM550643.CEL.gz	54675	65.62	monosomy	no	right	male	no	14.16	yes
GSM550644	Uveal Melanoma MU67	GSM550644	Public on Dec 14 2010	Jun 04 2010	Dec 14 2010	RNA	1	Eye	Homo sapiens	tissue: Uveal Melanoma (eye)	age: 47.62	gender: female	eye: left	tumor location: on equator	tumor diameter (mm): 17	tumor thickness (mm): 9.7	tumor cell type: mixed	retinal detachment: yes	extrascleral extension: no	chromosome 3 status: disomy	months to endpoint: 67.98	metastasis: no	total RNA	Trizol extraction of total RNA was performed according to the manufacturer's instructions. A cleanup with RNAII Nucleospin was conducted according Macherey Nagel recommendations	Biotin	Biotinylated cRNA were prepared according to the Affymetrix two round amplification protocol from 100ng total RNA (Expression Analysis Technical Manual, 2001, Affymetrix).	9606	Following fragmentation, 10 ug of labelled cRNA were hybridized for 16 hr on GeneChip Human Genome Array. GeneChips were washed and stained in the Affymetrix Fluidics Station FS450.	GeneChips were scanned using Affymetrix GeneChip GCS3000 scanner.	Gene expression data from Uveal Melanoma	Raw data were controlled using Genechip Operating Software and Affymetrix MAS5 algorithm to control the quality of hybridization and synthesis steps. Raw data were analysed using R/Bioconductor and normalized by GC-RMA method.	GPL570	Cecile,,Laurent	cecile.laurent@curie.fr	Institut Curie	26 rue d'ulm	Paris Cedex 05	75248	France	ftp://ftp.ncbi.nlm.nih.gov/geo/samples/GSM550nnn/GSM550644/suppl/GSM550644.CEL.gz	54675	47.62	disomy	no	left	female	no	67.98	yes
GSM550645	Uveal Melanoma MU85	GSM550645	Public on Dec 14 2010	Jun 04 2010	Dec 14 2010	RNA	1	Eye	Homo sapiens	tissue: Uveal Melanoma (eye)	age: 69.09	gender: male	eye: right	tumor location: all over the eye	tumor diameter (mm): 21	tumor thickness (mm): 14	tumor cell type: mixed	retinal detachment: yes	extrascleral extension: NA	chromosome 3 status: NA	months to endpoint: 7.06	metastasis: yes	total RNA	Trizol extraction of total RNA was performed according to the manufacturer's instructions. A cleanup with RNAII Nucleospin was conducted according Macherey Nagel recommendations	Biotin	Biotinylated cRNA were prepared according to the Affymetrix two round amplification protocol from 100ng total RNA (Expression Analysis Technical Manual, 2001, Affymetrix).	9606	Following fragmentation, 10 ug of labelled cRNA were hybridized for 16 hr on GeneChip Human Genome Array. GeneChips were washed and stained in the Affymetrix Fluidics Station FS450.	GeneChips were scanned using Affymetrix GeneChip GCS3000 scanner.	Gene expression data from Uveal Melanoma	Raw data were controlled using Genechip Operating Software and Affymetrix MAS5 algorithm to control the quality of hybridization and synthesis steps. Raw data were analysed using R/Bioconductor and normalized by GC-RMA method.	GPL570	Cecile,,Laurent	cecile.laurent@curie.fr	Institut Curie	26 rue d'ulm	Paris Cedex 05	75248	France	ftp://ftp.ncbi.nlm.nih.gov/geo/samples/GSM550nnn/GSM550645/suppl/GSM550645.CEL.gz	54675	69.09	NA	NA	right	male	yes	7.06	yes
GSM550646	Uveal Melanoma MU86	GSM550646	Public on Dec 14 2010	Jun 04 2010	Dec 14 2010	RNA	1	Eye	Homo sapiens	tissue: Uveal Melanoma (eye)	age: 75.75	gender: female	eye: right	tumor location: posterior and on equator	tumor diameter (mm): 12	tumor thickness (mm): 10	tumor cell type: epithelioid	retinal detachment: yes	extrascleral extension: NA	chromosome 3 status: monosomy	months to endpoint: 8.67	metastasis: yes	total RNA	Trizol extraction of total RNA was performed according to the manufacturer's instructions. A cleanup with RNAII Nucleospin was conducted according Macherey Nagel recommendations	Biotin	Biotinylated cRNA were prepared according to the Affymetrix two round amplification protocol from 100ng total RNA (Expression Analysis Technical Manual, 2001, Affymetrix).	9606	Following fragmentation, 10 ug of labelled cRNA were hybridized for 16 hr on GeneChip Human Genome Array. GeneChips were washed and stained in the Affymetrix Fluidics Station FS450.	GeneChips were scanned using Affymetrix GeneChip GCS3000 scanner.	Gene expression data from Uveal Melanoma	Raw data were controlled using Genechip Operating Software and Affymetrix MAS5 algorithm to control the quality of hybridization and synthesis steps. Raw data were analysed using R/Bioconductor and normalized by GC-RMA method.	GPL570	Cecile,,Laurent	cecile.laurent@curie.fr	Institut Curie	26 rue d'ulm	Paris Cedex 05	75248	France	ftp://ftp.ncbi.nlm.nih.gov/geo/samples/GSM550nnn/GSM550646/suppl/GSM550646.CEL.gz	54675	75.75	monosomy	NA	right	female	yes	8.67	yes
GSM550647	Uveal Melanoma MU87	GSM550647	Public on Dec 14 2010	Jun 04 2010	Dec 14 2010	RNA	1	Eye	Homo sapiens	tissue: Uveal Melanoma (eye)	age: 67.46	gender: female	eye: left	tumor location: on equator	tumor diameter (mm): 18	tumor thickness (mm): 11.7	tumor cell type: NA	retinal detachment: yes	extrascleral extension: no	chromosome 3 status: monosomy	months to endpoint: 49.02	metastasis: yes	total RNA	Trizol extraction of total RNA was performed according to the manufacturer's instructions. A cleanup with RNAII Nucleospin was conducted according Macherey Nagel recommendations	Biotin	Biotinylated cRNA were prepared according to the Affymetrix two round amplification protocol from 100ng total RNA (Expression Analysis Technical Manual, 2001, Affymetrix).	9606	Following fragmentation, 10 ug of labelled cRNA were hybridized for 16 hr on GeneChip Human Genome Array. GeneChips were washed and stained in the Affymetrix Fluidics Station FS450.	GeneChips were scanned using Affymetrix GeneChip GCS3000 scanner.	Gene expression data from Uveal Melanoma	Raw data were controlled using Genechip Operating Software and Affymetrix MAS5 algorithm to control the quality of hybridization and synthesis steps. Raw data were analysed using R/Bioconductor and normalized by GC-RMA method.	GPL570	Cecile,,Laurent	cecile.laurent@curie.fr	Institut Curie	26 rue d'ulm	Paris Cedex 05	75248	France	ftp://ftp.ncbi.nlm.nih.gov/geo/samples/GSM550nnn/GSM550647/suppl/GSM550647.CEL.gz	54675	67.46	monosomy	no	left	female	yes	49.02	yes
GSM550648	Uveal Melanoma MU88	GSM550648	Public on Dec 14 2010	Jun 04 2010	Dec 14 2010	RNA	1	Eye	Homo sapiens	tissue: Uveal Melanoma (eye)	age: 40.41	gender: female	eye: left	tumor location: on equator	tumor diameter (mm): 15	tumor thickness (mm): 11.4	tumor cell type: NA	retinal detachment: yes	extrascleral extension: no	chromosome 3 status: monosomy	months to endpoint: 28.88	metastasis: yes	total RNA	Trizol extraction of total RNA was performed according to the manufacturer's instructions. A cleanup with RNAII Nucleospin was conducted according Macherey Nagel recommendations	Biotin	Biotinylated cRNA were prepared according to the Affymetrix two round amplification protocol from 100ng total RNA (Expression Analysis Technical Manual, 2001, Affymetrix).	9606	Following fragmentation, 10 ug of labelled cRNA were hybridized for 16 hr on GeneChip Human Genome Array. GeneChips were washed and stained in the Affymetrix Fluidics Station FS450.	GeneChips were scanned using Affymetrix GeneChip GCS3000 scanner.	Gene expression data from Uveal Melanoma	Raw data were controlled using Genechip Operating Software and Affymetrix MAS5 algorithm to control the quality of hybridization and synthesis steps. Raw data were analysed using R/Bioconductor and normalized by GC-RMA method.	GPL570	Cecile,,Laurent	cecile.laurent@curie.fr	Institut Curie	26 rue d'ulm	Paris Cedex 05	75248	France	ftp://ftp.ncbi.nlm.nih.gov/geo/samples/GSM550nnn/GSM550648/suppl/GSM550648.CEL.gz	54675	40.41	monosomy	no	left	female	yes	28.88	yes
GSM550649	Uveal Melanoma MU89	GSM550649	Public on Dec 14 2010	Jun 04 2010	Dec 14 2010	RNA	1	Eye	Homo sapiens	tissue: Uveal Melanoma (eye)	age: 72.29	gender: male	eye: left	tumor location: NA	tumor diameter (mm): 22	tumor thickness (mm): 14	tumor cell type: epithelioid	retinal detachment: yes	extrascleral extension: no	chromosome 3 status: partial monosomy	months to endpoint: 20.99	metastasis: yes	total RNA	Trizol extraction of total RNA was performed according to the manufacturer's instructions. A cleanup with RNAII Nucleospin was conducted according Macherey Nagel recommendations	Biotin	Biotinylated cRNA were prepared according to the Affymetrix two round amplification protocol from 100ng total RNA (Expression Analysis Technical Manual, 2001, Affymetrix).	9606	Following fragmentation, 10 ug of labelled cRNA were hybridized for 16 hr on GeneChip Human Genome Array. GeneChips were washed and stained in the Affymetrix Fluidics Station FS450.	GeneChips were scanned using Affymetrix GeneChip GCS3000 scanner.	Gene expression data from Uveal Melanoma	Raw data were controlled using Genechip Operating Software and Affymetrix MAS5 algorithm to control the quality of hybridization and synthesis steps. Raw data were analysed using R/Bioconductor and normalized by GC-RMA method.	GPL570	Cecile,,Laurent	cecile.laurent@curie.fr	Institut Curie	26 rue d'ulm	Paris Cedex 05	75248	France	ftp://ftp.ncbi.nlm.nih.gov/geo/samples/GSM550nnn/GSM550649/suppl/GSM550649.CEL.gz	54675	72.29	partial monosomy	no	left	male	yes	20.99	yes
GSM550650	Uveal Melanoma MU107	GSM550650	Public on Dec 14 2010	Jun 04 2010	Dec 14 2010	RNA	1	Eye	Homo sapiens	tissue: Uveal Melanoma (eye)	age: 62.62	gender: male	eye: left	tumor location: on equator	tumor diameter (mm): 13	tumor thickness (mm): 13	tumor cell type: mixed	retinal detachment: no	extrascleral extension: no	chromosome 3 status: monosomy	months to endpoint: 100.4	metastasis: no	total RNA	Trizol extraction of total RNA was performed according to the manufacturer's instructions. A cleanup with RNAII Nucleospin was conducted according Macherey Nagel recommendations	Biotin	Biotinylated cRNA were prepared according to the Affymetrix two round amplification protocol from 100ng total RNA (Expression Analysis Technical Manual, 2001, Affymetrix).	9606	Following fragmentation, 10 ug of labelled cRNA were hybridized for 16 hr on GeneChip Human Genome Array. GeneChips were washed and stained in the Affymetrix Fluidics Station FS450.	GeneChips were scanned using Affymetrix GeneChip GCS3000 scanner.	Gene expression data from Uveal Melanoma	Raw data were controlled using Genechip Operating Software and Affymetrix MAS5 algorithm to control the quality of hybridization and synthesis steps. Raw data were analysed using R/Bioconductor and normalized by GC-RMA method.	GPL570	Cecile,,Laurent	cecile.laurent@curie.fr	Institut Curie	26 rue d'ulm	Paris Cedex 05	75248	France	ftp://ftp.ncbi.nlm.nih.gov/geo/samples/GSM550nnn/GSM550650/suppl/GSM550650.CEL.gz	54675	62.62	monosomy	no	left	male	no	100.4	no
GSM550651	Uveal Melanoma MU108	GSM550651	Public on Dec 14 2010	Jun 04 2010	Dec 14 2010	RNA	1	Eye	Homo sapiens	tissue: Uveal Melanoma (eye)	age: 51.91	gender: female	eye: right	tumor location: posterior to equator	tumor diameter (mm): 15	tumor thickness (mm): 11	tumor cell type: mixed	retinal detachment: no	extrascleral extension: no	chromosome 3 status: partial monosomy	months to endpoint: 85.82	metastasis: no	total RNA	Trizol extraction of total RNA was performed according to the manufacturer's instructions. A cleanup with RNAII Nucleospin was conducted according Macherey Nagel recommendations	Biotin	Biotinylated cRNA were prepared according to the Affymetrix two round amplification protocol from 100ng total RNA (Expression Analysis Technical Manual, 2001, Affymetrix).	9606	Following fragmentation, 10 ug of labelled cRNA were hybridized for 16 hr on GeneChip Human Genome Array. GeneChips were washed and stained in the Affymetrix Fluidics Station FS450.	GeneChips were scanned using Affymetrix GeneChip GCS3000 scanner.	Gene expression data from Uveal Melanoma	Raw data were controlled using Genechip Operating Software and Affymetrix MAS5 algorithm to control the quality of hybridization and synthesis steps. Raw data were analysed using R/Bioconductor and normalized by GC-RMA method.	GPL570	Cecile,,Laurent	cecile.laurent@curie.fr	Institut Curie	26 rue d'ulm	Paris Cedex 05	75248	France	ftp://ftp.ncbi.nlm.nih.gov/geo/samples/GSM550nnn/GSM550651/suppl/GSM550651.CEL.gz	54675	51.91	partial monosomy	no	right	female	no	85.82	no
GSM550652	Uveal Melanoma MU109	GSM550652	Public on Dec 14 2010	Jun 04 2010	Dec 14 2010	RNA	1	Eye	Homo sapiens	tissue: Uveal Melanoma (eye)	age: 63.03	gender: male	eye: right	tumor location: anterior to equator	tumor diameter (mm): 10	tumor thickness (mm): 11	tumor cell type: epithelioid	retinal detachment: no	extrascleral extension: no	chromosome 3 status: monosomy	months to endpoint: 24.54	metastasis: yes	total RNA	Trizol extraction of total RNA was performed according to the manufacturer's instructions. A cleanup with RNAII Nucleospin was conducted according Macherey Nagel recommendations	Biotin	Biotinylated cRNA were prepared according to the Affymetrix two round amplification protocol from 100ng total RNA (Expression Analysis Technical Manual, 2001, Affymetrix).	9606	Following fragmentation, 10 ug of labelled cRNA were hybridized for 16 hr on GeneChip Human Genome Array. GeneChips were washed and stained in the Affymetrix Fluidics Station FS450.	GeneChips were scanned using Affymetrix GeneChip GCS3000 scanner.	Gene expression data from Uveal Melanoma	Raw data were controlled using Genechip Operating Software and Affymetrix MAS5 algorithm to control the quality of hybridization and synthesis steps. Raw data were analysed using R/Bioconductor and normalized by GC-RMA method.	GPL570	Cecile,,Laurent	cecile.laurent@curie.fr	Institut Curie	26 rue d'ulm	Paris Cedex 05	75248	France	ftp://ftp.ncbi.nlm.nih.gov/geo/samples/GSM550nnn/GSM550652/suppl/GSM550652.CEL.gz	54675	63.03	monosomy	no	right	male	yes	24.54	no
GSM550653	Uveal Melanoma MU110	GSM550653	Public on Dec 14 2010	Jun 04 2010	Dec 14 2010	RNA	1	Eye	Homo sapiens	tissue: Uveal Melanoma (eye)	age: 65.2	gender: male	eye: right	tumor location: on equator	tumor diameter (mm): NA	tumor thickness (mm): 12.8	tumor cell type: mixed	retinal detachment: yes	extrascleral extension: no	chromosome 3 status: partial monosomy	months to endpoint: 35.78	metastasis: yes	total RNA	Trizol extraction of total RNA was performed according to the manufacturer's instructions. A cleanup with RNAII Nucleospin was conducted according Macherey Nagel recommendations	Biotin	Biotinylated cRNA were prepared according to the Affymetrix two round amplification protocol from 100ng total RNA (Expression Analysis Technical Manual, 2001, Affymetrix).	9606	Following fragmentation, 10 ug of labelled cRNA were hybridized for 16 hr on GeneChip Human Genome Array. GeneChips were washed and stained in the Affymetrix Fluidics Station FS450.	GeneChips were scanned using Affymetrix GeneChip GCS3000 scanner.	Gene expression data from Uveal Melanoma	Raw data were controlled using Genechip Operating Software and Affymetrix MAS5 algorithm to control the quality of hybridization and synthesis steps. Raw data were analysed using R/Bioconductor and normalized by GC-RMA method.	GPL570	Cecile,,Laurent	cecile.laurent@curie.fr	Institut Curie	26 rue d'ulm	Paris Cedex 05	75248	France	ftp://ftp.ncbi.nlm.nih.gov/geo/samples/GSM550nnn/GSM550653/suppl/GSM550653.CEL.gz	54675	65.2	partial monosomy	no	right	male	yes	35.78	yes
GSM550654	Uveal Melanoma MU111	GSM550654	Public on Dec 14 2010	Jun 04 2010	Dec 14 2010	RNA	1	Eye	Homo sapiens	tissue: Uveal Melanoma (eye)	age: 40.31	gender: male	eye: right	tumor location: on equator	tumor diameter (mm): 18	tumor thickness (mm): 11	tumor cell type: NA	retinal detachment: yes	extrascleral extension: no	chromosome 3 status: disomy	months to endpoint: 55.75	metastasis: no	total RNA	Trizol extraction of total RNA was performed according to the manufacturer's instructions. A cleanup with RNAII Nucleospin was conducted according Macherey Nagel recommendations	Biotin	Biotinylated cRNA were prepared according to the Affymetrix two round amplification protocol from 100ng total RNA (Expression Analysis Technical Manual, 2001, Affymetrix).	9606	Following fragmentation, 10 ug of labelled cRNA were hybridized for 16 hr on GeneChip Human Genome Array. GeneChips were washed and stained in the Affymetrix Fluidics Station FS450.	GeneChips were scanned using Affymetrix GeneChip GCS3000 scanner.	Gene expression data from Uveal Melanoma	Raw data were controlled using Genechip Operating Software and Affymetrix MAS5 algorithm to control the quality of hybridization and synthesis steps. Raw data were analysed using R/Bioconductor and normalized by GC-RMA method.	GPL570	Cecile,,Laurent	cecile.laurent@curie.fr	Institut Curie	26 rue d'ulm	Paris Cedex 05	75248	France	ftp://ftp.ncbi.nlm.nih.gov/geo/samples/GSM550nnn/GSM550654/suppl/GSM550654.CEL.gz	54675	40.31	disomy	no	right	male	no	55.75	yes
GSM550655	Uveal Melanoma MU129	GSM550655	Public on Dec 14 2010	Jun 04 2010	Dec 14 2010	RNA	1	Eye	Homo sapiens	tissue: Uveal Melanoma (eye)	age: 28.56	gender: female	eye: left	tumor location: on equator	tumor diameter (mm): 17	tumor thickness (mm): 13	tumor cell type: mixed	retinal detachment: no	extrascleral extension: NA	chromosome 3 status: disomy	months to endpoint: 90.02	metastasis: no	total RNA	Trizol extraction of total RNA was performed according to the manufacturer's instructions. A cleanup with RNAII Nucleospin was conducted according Macherey Nagel recommendations	Biotin	Biotinylated cRNA were prepared according to the Affymetrix two round amplification protocol from 100ng total RNA (Expression Analysis Technical Manual, 2001, Affymetrix).	9606	Following fragmentation, 10 ug of labelled cRNA were hybridized for 16 hr on GeneChip Human Genome Array. GeneChips were washed and stained in the Affymetrix Fluidics Station FS450.	GeneChips were scanned using Affymetrix GeneChip GCS3000 scanner.	Gene expression data from Uveal Melanoma	Raw data were controlled using Genechip Operating Software and Affymetrix MAS5 algorithm to control the quality of hybridization and synthesis steps. Raw data were analysed using R/Bioconductor and normalized by GC-RMA method.	GPL570	Cecile,,Laurent	cecile.laurent@curie.fr	Institut Curie	26 rue d'ulm	Paris Cedex 05	75248	France	ftp://ftp.ncbi.nlm.nih.gov/geo/samples/GSM550nnn/GSM550655/suppl/GSM550655.CEL.gz	54675	28.56	disomy	NA	left	female	no	90.02	no
GSM550656	Uveal Melanoma MU130	GSM550656	Public on Dec 14 2010	Jun 04 2010	Dec 14 2010	RNA	1	Eye	Homo sapiens	tissue: Uveal Melanoma (eye)	age: 57.69	gender: male	eye: left	tumor location: posterior to equator	tumor diameter (mm): 16	tumor thickness (mm): 10.5	tumor cell type: NA	retinal detachment: yes	extrascleral extension: no	chromosome 3 status: disomy	months to endpoint: 93.73	metastasis: no	total RNA	Trizol extraction of total RNA was performed according to the manufacturer's instructions. A cleanup with RNAII Nucleospin was conducted according Macherey Nagel recommendations	Biotin	Biotinylated cRNA were prepared according to the Affymetrix two round amplification protocol from 100ng total RNA (Expression Analysis Technical Manual, 2001, Affymetrix).	9606	Following fragmentation, 10 ug of labelled cRNA were hybridized for 16 hr on GeneChip Human Genome Array. GeneChips were washed and stained in the Affymetrix Fluidics Station FS450.	GeneChips were scanned using Affymetrix GeneChip GCS3000 scanner.	Gene expression data from Uveal Melanoma	Raw data were controlled using Genechip Operating Software and Affymetrix MAS5 algorithm to control the quality of hybridization and synthesis steps. Raw data were analysed using R/Bioconductor and normalized by GC-RMA method.	GPL570	Cecile,,Laurent	cecile.laurent@curie.fr	Institut Curie	26 rue d'ulm	Paris Cedex 05	75248	France	ftp://ftp.ncbi.nlm.nih.gov/geo/samples/GSM550nnn/GSM550656/suppl/GSM550656.CEL.gz	54675	57.69	disomy	no	left	male	no	93.73	yes
GSM550657	Uveal Melanoma MU131	GSM550657	Public on Dec 14 2010	Jun 04 2010	Dec 14 2010	RNA	1	Eye	Homo sapiens	tissue: Uveal Melanoma (eye)	age: 55.68	gender: female	eye: left	tumor location: on equator	tumor diameter (mm): 19	tumor thickness (mm): 11.7	tumor cell type: epithelioid	retinal detachment: yes	extrascleral extension: no	chromosome 3 status: monosomy	months to endpoint: 27.3	metastasis: yes	total RNA	Trizol extraction of total RNA was performed according to the manufacturer's instructions. A cleanup with RNAII Nucleospin was conducted according Macherey Nagel recommendations	Biotin	Biotinylated cRNA were prepared according to the Affymetrix two round amplification protocol from 100ng total RNA (Expression Analysis Technical Manual, 2001, Affymetrix).	9606	Following fragmentation, 10 ug of labelled cRNA were hybridized for 16 hr on GeneChip Human Genome Array. GeneChips were washed and stained in the Affymetrix Fluidics Station FS450.	GeneChips were scanned using Affymetrix GeneChip GCS3000 scanner.	Gene expression data from Uveal Melanoma	Raw data were controlled using Genechip Operating Software and Affymetrix MAS5 algorithm to control the quality of hybridization and synthesis steps. Raw data were analysed using R/Bioconductor and normalized by GC-RMA method.	GPL570	Cecile,,Laurent	cecile.laurent@curie.fr	Institut Curie	26 rue d'ulm	Paris Cedex 05	75248	France	ftp://ftp.ncbi.nlm.nih.gov/geo/samples/GSM550nnn/GSM550657/suppl/GSM550657.CEL.gz	54675	55.68	monosomy	no	left	female	yes	27.3	yes
GSM550658	Uveal Melanoma MU132	GSM550658	Public on Dec 14 2010	Jun 04 2010	Dec 14 2010	RNA	1	Eye	Homo sapiens	tissue: Uveal Melanoma (eye)	age: 72.82	gender: male	eye: left	tumor location: on equator	tumor diameter (mm): 20	tumor thickness (mm): 14	tumor cell type: mixed	retinal detachment: no	extrascleral extension: no	chromosome 3 status: disomy	months to endpoint: 70.14	metastasis: no	total RNA	Trizol extraction of total RNA was performed according to the manufacturer's instructions. A cleanup with RNAII Nucleospin was conducted according Macherey Nagel recommendations	Biotin	Biotinylated cRNA were prepared according to the Affymetrix two round amplification protocol from 100ng total RNA (Expression Analysis Technical Manual, 2001, Affymetrix).	9606	Following fragmentation, 10 ug of labelled cRNA were hybridized for 16 hr on GeneChip Human Genome Array. GeneChips were washed and stained in the Affymetrix Fluidics Station FS450.	GeneChips were scanned using Affymetrix GeneChip GCS3000 scanner.	Gene expression data from Uveal Melanoma	Raw data were controlled using Genechip Operating Software and Affymetrix MAS5 algorithm to control the quality of hybridization and synthesis steps. Raw data were analysed using R/Bioconductor and normalized by GC-RMA method.	GPL570	Cecile,,Laurent	cecile.laurent@curie.fr	Institut Curie	26 rue d'ulm	Paris Cedex 05	75248	France	ftp://ftp.ncbi.nlm.nih.gov/geo/samples/GSM550nnn/GSM550658/suppl/GSM550658.CEL.gz	54675	72.82	disomy	no	left	male	no	70.14	no
GSM550659	Uveal Melanoma MU151	GSM550659	Public on Dec 14 2010	Jun 04 2010	Dec 14 2010	RNA	1	Eye	Homo sapiens	tissue: Uveal Melanoma (eye)	age: 47.43	gender: female	eye: right	tumor location: posterior and on equator	tumor diameter (mm): 17	tumor thickness (mm): 13.5	tumor cell type: NA	retinal detachment: yes	extrascleral extension: NA	chromosome 3 status: partial monosomy	months to endpoint: 52.57	metastasis: yes	total RNA	Trizol extraction of total RNA was performed according to the manufacturer's instructions. A cleanup with RNAII Nucleospin was conducted according Macherey Nagel recommendations	Biotin	Biotinylated cRNA were prepared according to the Affymetrix two round amplification protocol from 100ng total RNA (Expression Analysis Technical Manual, 2001, Affymetrix).	9606	Following fragmentation, 10 ug of labelled cRNA were hybridized for 16 hr on GeneChip Human Genome Array. GeneChips were washed and stained in the Affymetrix Fluidics Station FS450.	GeneChips were scanned using Affymetrix GeneChip GCS3000 scanner.	Gene expression data from Uveal Melanoma	Raw data were controlled using Genechip Operating Software and Affymetrix MAS5 algorithm to control the quality of hybridization and synthesis steps. Raw data were analysed using R/Bioconductor and normalized by GC-RMA method.	GPL570	Cecile,,Laurent	cecile.laurent@curie.fr	Institut Curie	26 rue d'ulm	Paris Cedex 05	75248	France	ftp://ftp.ncbi.nlm.nih.gov/geo/samples/GSM550nnn/GSM550659/suppl/GSM550659.CEL.gz	54675	47.43	partial monosomy	NA	right	female	yes	52.57	yes
GSM550660	Uveal Melanoma MU152	GSM550660	Public on Dec 14 2010	Jun 04 2010	Dec 14 2010	RNA	1	Eye	Homo sapiens	tissue: Uveal Melanoma (eye)	age: 78.98	gender: male	eye: left	tumor location: NA	tumor diameter (mm): NA	tumor thickness (mm): 11.1	tumor cell type: epithelioid	retinal detachment: no	extrascleral extension: no	chromosome 3 status: monosomy	months to endpoint: 39.69	metastasis: no	total RNA	Trizol extraction of total RNA was performed according to the manufacturer's instructions. A cleanup with RNAII Nucleospin was conducted according Macherey Nagel recommendations	Biotin	Biotinylated cRNA were prepared according to the Affymetrix two round amplification protocol from 100ng total RNA (Expression Analysis Technical Manual, 2001, Affymetrix).	9606	Following fragmentation, 10 ug of labelled cRNA were hybridized for 16 hr on GeneChip Human Genome Array. GeneChips were washed and stained in the Affymetrix Fluidics Station FS450.	GeneChips were scanned using Affymetrix GeneChip GCS3000 scanner.	Gene expression data from Uveal Melanoma	Raw data were controlled using Genechip Operating Software and Affymetrix MAS5 algorithm to control the quality of hybridization and synthesis steps. Raw data were analysed using R/Bioconductor and normalized by GC-RMA method.	GPL570	Cecile,,Laurent	cecile.laurent@curie.fr	Institut Curie	26 rue d'ulm	Paris Cedex 05	75248	France	ftp://ftp.ncbi.nlm.nih.gov/geo/samples/GSM550nnn/GSM550660/suppl/GSM550660.CEL.gz	54675	78.98	monosomy	no	left	male	no	39.69	no
GSM550661	Uveal Melanoma MU153	GSM550661	Public on Dec 14 2010	Jun 04 2010	Dec 14 2010	RNA	1	Eye	Homo sapiens	tissue: Uveal Melanoma (eye)	age: 77.95	gender: female	eye: right	tumor location: on equator	tumor diameter (mm): 16	tumor thickness (mm): 11.7	tumor cell type: epithelioid	retinal detachment: no	extrascleral extension: no	chromosome 3 status: monosomy	months to endpoint: 18.96	metastasis: yes	total RNA	Trizol extraction of total RNA was performed according to the manufacturer's instructions. A cleanup with RNAII Nucleospin was conducted according Macherey Nagel recommendations	Biotin	Biotinylated cRNA were prepared according to the Affymetrix two round amplification protocol from 100ng total RNA (Expression Analysis Technical Manual, 2001, Affymetrix).	9606	Following fragmentation, 10 ug of labelled cRNA were hybridized for 16 hr on GeneChip Human Genome Array. GeneChips were washed and stained in the Affymetrix Fluidics Station FS450.	GeneChips were scanned using Affymetrix GeneChip GCS3000 scanner.	Gene expression data from Uveal Melanoma	Raw data were controlled using Genechip Operating Software and Affymetrix MAS5 algorithm to control the quality of hybridization and synthesis steps. Raw data were analysed using R/Bioconductor and normalized by GC-RMA method.	GPL570	Cecile,,Laurent	cecile.laurent@curie.fr	Institut Curie	26 rue d'ulm	Paris Cedex 05	75248	France	ftp://ftp.ncbi.nlm.nih.gov/geo/samples/GSM550nnn/GSM550661/suppl/GSM550661.CEL.gz	54675	77.95	monosomy	no	right	female	yes	18.96	no
GSM550662	Uveal Melanoma MU164	GSM550662	Public on Dec 14 2010	Jun 04 2010	Dec 14 2010	RNA	1	Eye	Homo sapiens	tissue: Uveal Melanoma (eye)	age: 62.88	gender: male	eye: left	tumor location: on equator	tumor diameter (mm): NA	tumor thickness (mm): 11.5	tumor cell type: epithelioid	retinal detachment: no	extrascleral extension: no	chromosome 3 status: monosomy	months to endpoint: 12.88	metastasis: yes	total RNA	Trizol extraction of total RNA was performed according to the manufacturer's instructions. A cleanup with RNAII Nucleospin was conducted according Macherey Nagel recommendations	Biotin	Biotinylated cRNA were prepared according to the Affymetrix two round amplification protocol from 100ng total RNA (Expression Analysis Technical Manual, 2001, Affymetrix).	9606	Following fragmentation, 10 ug of labelled cRNA were hybridized for 16 hr on GeneChip Human Genome Array. GeneChips were washed and stained in the Affymetrix Fluidics Station FS450.	GeneChips were scanned using Affymetrix GeneChip GCS3000 scanner.	Gene expression data from Uveal Melanoma	Raw data were controlled using Genechip Operating Software and Affymetrix MAS5 algorithm to control the quality of hybridization and synthesis steps. Raw data were analysed using R/Bioconductor and normalized by GC-RMA method.	GPL570	Cecile,,Laurent	cecile.laurent@curie.fr	Institut Curie	26 rue d'ulm	Paris Cedex 05	75248	France	ftp://ftp.ncbi.nlm.nih.gov/geo/samples/GSM550nnn/GSM550662/suppl/GSM550662.CEL.gz	54675	62.88	monosomy	no	left	male	yes	12.88	no
GSM550663	Uveal Melanoma MU166	GSM550663	Public on Dec 14 2010	Jun 04 2010	Dec 14 2010	RNA	1	Eye	Homo sapiens	tissue: Uveal Melanoma (eye)	age: 54.41	gender: female	eye: left	tumor location: on equator	tumor diameter (mm): 10	tumor thickness (mm): 9.3	tumor cell type: epithelioid	retinal detachment: yes	extrascleral extension: no	chromosome 3 status: monosomy	months to endpoint: 0.13	metastasis: yes	total RNA	Trizol extraction of total RNA was performed according to the manufacturer's instructions. A cleanup with RNAII Nucleospin was conducted according Macherey Nagel recommendations	Biotin	Biotinylated cRNA were prepared according to the Affymetrix two round amplification protocol from 100ng total RNA (Expression Analysis Technical Manual, 2001, Affymetrix).	9606	Following fragmentation, 10 ug of labelled cRNA were hybridized for 16 hr on GeneChip Human Genome Array. GeneChips were washed and stained in the Affymetrix Fluidics Station FS450.	GeneChips were scanned using Affymetrix GeneChip GCS3000 scanner.	Gene expression data from Uveal Melanoma	Raw data were controlled using Genechip Operating Software and Affymetrix MAS5 algorithm to control the quality of hybridization and synthesis steps. Raw data were analysed using R/Bioconductor and normalized by GC-RMA method.	GPL570	Cecile,,Laurent	cecile.laurent@curie.fr	Institut Curie	26 rue d'ulm	Paris Cedex 05	75248	France	ftp://ftp.ncbi.nlm.nih.gov/geo/samples/GSM550nnn/GSM550663/suppl/GSM550663.CEL.gz	54675	54.41	monosomy	no	left	female	yes	0.13	yes
GSM550664	Uveal Melanoma MU167	GSM550664	Public on Dec 14 2010	Jun 04 2010	Dec 14 2010	RNA	1	Eye	Homo sapiens	tissue: Uveal Melanoma (eye)	age: 77.68	gender: female	eye: right	tumor location: anterior to equator	tumor diameter (mm): 11	tumor thickness (mm): 11.8	tumor cell type: epithelioid	retinal detachment: no	extrascleral extension: no	chromosome 3 status: monosomy	months to endpoint: 24.44	metastasis: yes	total RNA	Trizol extraction of total RNA was performed according to the manufacturer's instructions. A cleanup with RNAII Nucleospin was conducted according Macherey Nagel recommendations	Biotin	Biotinylated cRNA were prepared according to the Affymetrix two round amplification protocol from 100ng total RNA (Expression Analysis Technical Manual, 2001, Affymetrix).	9606	Following fragmentation, 10 ug of labelled cRNA were hybridized for 16 hr on GeneChip Human Genome Array. GeneChips were washed and stained in the Affymetrix Fluidics Station FS450.	GeneChips were scanned using Affymetrix GeneChip GCS3000 scanner.	Gene expression data from Uveal Melanoma	Raw data were controlled using Genechip Operating Software and Affymetrix MAS5 algorithm to control the quality of hybridization and synthesis steps. Raw data were analysed using R/Bioconductor and normalized by GC-RMA method.	GPL570	Cecile,,Laurent	cecile.laurent@curie.fr	Institut Curie	26 rue d'ulm	Paris Cedex 05	75248	France	ftp://ftp.ncbi.nlm.nih.gov/geo/samples/GSM550nnn/GSM550664/suppl/GSM550664.CEL.gz	54675	77.68	monosomy	no	right	female	yes	24.44	no
GSM550665	Uveal Melanoma MU173	GSM550665	Public on Dec 14 2010	Jun 04 2010	Dec 14 2010	RNA	1	Eye	Homo sapiens	tissue: Uveal Melanoma (eye)	age: 56.17	gender: female	eye: left	tumor location: on equator	tumor diameter (mm): 19	tumor thickness (mm): 12	tumor cell type: NA	retinal detachment: no	extrascleral extension: no	chromosome 3 status: disomy	months to endpoint: 62.69	metastasis: no	total RNA	Trizol extraction of total RNA was performed according to the manufacturer's instructions. A cleanup with RNAII Nucleospin was conducted according Macherey Nagel recommendations	Biotin	Biotinylated cRNA were prepared according to the Affymetrix two round amplification protocol from 100ng total RNA (Expression Analysis Technical Manual, 2001, Affymetrix).	9606	Following fragmentation, 10 ug of labelled cRNA were hybridized for 16 hr on GeneChip Human Genome Array. GeneChips were washed and stained in the Affymetrix Fluidics Station FS450.	GeneChips were scanned using Affymetrix GeneChip GCS3000 scanner.	Gene expression data from Uveal Melanoma	Raw data were controlled using Genechip Operating Software and Affymetrix MAS5 algorithm to control the quality of hybridization and synthesis steps. Raw data were analysed using R/Bioconductor and normalized by GC-RMA method.	GPL570	Cecile,,Laurent	cecile.laurent@curie.fr	Institut Curie	26 rue d'ulm	Paris Cedex 05	75248	France	ftp://ftp.ncbi.nlm.nih.gov/geo/samples/GSM550nnn/GSM550665/suppl/GSM550665.CEL.gz	54675	56.17	disomy	no	left	female	no	62.69	no
GSM550666	Uveal Melanoma MU174	GSM550666	Public on Dec 14 2010	Jun 04 2010	Dec 14 2010	RNA	1	Eye	Homo sapiens	tissue: Uveal Melanoma (eye)	age: 72.79	gender: male	eye: left	tumor location: on equator	tumor diameter (mm): 20	tumor thickness (mm): 12.4	tumor cell type: epithelioid	retinal detachment: no	extrascleral extension: no	chromosome 3 status: monosomy	months to endpoint: 67.75	metastasis: no	total RNA	Trizol extraction of total RNA was performed according to the manufacturer's instructions. A cleanup with RNAII Nucleospin was conducted according Macherey Nagel recommendations	Biotin	Biotinylated cRNA were prepared according to the Affymetrix two round amplification protocol from 100ng total RNA (Expression Analysis Technical Manual, 2001, Affymetrix).	9606	Following fragmentation, 10 ug of labelled cRNA were hybridized for 16 hr on GeneChip Human Genome Array. GeneChips were washed and stained in the Affymetrix Fluidics Station FS450.	GeneChips were scanned using Affymetrix GeneChip GCS3000 scanner.	Gene expression data from Uveal Melanoma	Raw data were controlled using Genechip Operating Software and Affymetrix MAS5 algorithm to control the quality of hybridization and synthesis steps. Raw data were analysed using R/Bioconductor and normalized by GC-RMA method.	GPL570	Cecile,,Laurent	cecile.laurent@curie.fr	Institut Curie	26 rue d'ulm	Paris Cedex 05	75248	France	ftp://ftp.ncbi.nlm.nih.gov/geo/samples/GSM550nnn/GSM550666/suppl/GSM550666.CEL.gz	54675	72.79	monosomy	no	left	male	no	67.75	no
GSM550667	Uveal Melanoma MU175	GSM550667	Public on Dec 14 2010	Jun 04 2010	Dec 14 2010	RNA	1	Eye	Homo sapiens	tissue: Uveal Melanoma (eye)	age: 53.07	gender: female	eye: right	tumor location: posterior to equator	tumor diameter (mm): 16	tumor thickness (mm): 6	tumor cell type: NA	retinal detachment: NA	extrascleral extension: yes	chromosome 3 status: monosomy	months to endpoint: 68.37	metastasis: yes	total RNA	Trizol extraction of total RNA was performed according to the manufacturer's instructions. A cleanup with RNAII Nucleospin was conducted according Macherey Nagel recommendations	Biotin	Biotinylated cRNA were prepared according to the Affymetrix two round amplification protocol from 100ng total RNA (Expression Analysis Technical Manual, 2001, Affymetrix).	9606	Following fragmentation, 10 ug of labelled cRNA were hybridized for 16 hr on GeneChip Human Genome Array. GeneChips were washed and stained in the Affymetrix Fluidics Station FS450.	GeneChips were scanned using Affymetrix GeneChip GCS3000 scanner.	Gene expression data from Uveal Melanoma	Raw data were controlled using Genechip Operating Software and Affymetrix MAS5 algorithm to control the quality of hybridization and synthesis steps. Raw data were analysed using R/Bioconductor and normalized by GC-RMA method.	GPL570	Cecile,,Laurent	cecile.laurent@curie.fr	Institut Curie	26 rue d'ulm	Paris Cedex 05	75248	France	ftp://ftp.ncbi.nlm.nih.gov/geo/samples/GSM550nnn/GSM550667/suppl/GSM550667.CEL.gz	54675	53.07	monosomy	yes	right	female	yes	68.37	NA
GSM550668	Uveal Melanoma MU185	GSM550668	Public on Dec 14 2010	Jun 04 2010	Dec 14 2010	RNA	1	Eye	Homo sapiens	tissue: Uveal Melanoma (eye)	age: 48.46	gender: male	eye: left	tumor location: on equator	tumor diameter (mm): 12	tumor thickness (mm): 10.5	tumor cell type: NA	retinal detachment: yes	extrascleral extension: no	chromosome 3 status: monosomy	months to endpoint: 14.95	metastasis: yes	total RNA	Trizol extraction of total RNA was performed according to the manufacturer's instructions. A cleanup with RNAII Nucleospin was conducted according Macherey Nagel recommendations	Biotin	Biotinylated cRNA were prepared according to the Affymetrix two round amplification protocol from 100ng total RNA (Expression Analysis Technical Manual, 2001, Affymetrix).	9606	Following fragmentation, 10 ug of labelled cRNA were hybridized for 16 hr on GeneChip Human Genome Array. GeneChips were washed and stained in the Affymetrix Fluidics Station FS450.	GeneChips were scanned using Affymetrix GeneChip GCS3000 scanner.	Gene expression data from Uveal Melanoma	Raw data were controlled using Genechip Operating Software and Affymetrix MAS5 algorithm to control the quality of hybridization and synthesis steps. Raw data were analysed using R/Bioconductor and normalized by GC-RMA method.	GPL570	Cecile,,Laurent	cecile.laurent@curie.fr	Institut Curie	26 rue d'ulm	Paris Cedex 05	75248	France	ftp://ftp.ncbi.nlm.nih.gov/geo/samples/GSM550nnn/GSM550668/suppl/GSM550668.CEL.gz	54675	48.46	monosomy	no	left	male	yes	14.95	yes
GSM550669	Uveal Melanoma MU192	GSM550669	Public on Dec 14 2010	Jun 04 2010	Dec 14 2010	RNA	1	Eye	Homo sapiens	tissue: Uveal Melanoma (eye)	age: 68.83	gender: female	eye: right	tumor location: posterior and on equator	tumor diameter (mm): 11	tumor thickness (mm): 11.5	tumor cell type: epithelioid	retinal detachment: yes	extrascleral extension: no	chromosome 3 status: NA	months to endpoint: 58.74	metastasis: yes	total RNA	Trizol extraction of total RNA was performed according to the manufacturer's instructions. A cleanup with RNAII Nucleospin was conducted according Macherey Nagel recommendations	Biotin	Biotinylated cRNA were prepared according to the Affymetrix two round amplification protocol from 100ng total RNA (Expression Analysis Technical Manual, 2001, Affymetrix).	9606	Following fragmentation, 10 ug of labelled cRNA were hybridized for 16 hr on GeneChip Human Genome Array. GeneChips were washed and stained in the Affymetrix Fluidics Station FS450.	GeneChips were scanned using Affymetrix GeneChip GCS3000 scanner.	Gene expression data from Uveal Melanoma	Raw data were controlled using Genechip Operating Software and Affymetrix MAS5 algorithm to control the quality of hybridization and synthesis steps. Raw data were analysed using R/Bioconductor and normalized by GC-RMA method.	GPL570	Cecile,,Laurent	cecile.laurent@curie.fr	Institut Curie	26 rue d'ulm	Paris Cedex 05	75248	France	ftp://ftp.ncbi.nlm.nih.gov/geo/samples/GSM550nnn/GSM550669/suppl/GSM550669.CEL.gz	54675	68.83	NA	no	right	female	yes	58.74	yes
GSM550670	Uveal Melanoma MU195	GSM550670	Public on Dec 14 2010	Jun 04 2010	Dec 14 2010	RNA	1	Eye	Homo sapiens	tissue: Uveal Melanoma (eye)	age: 62.12	gender: male	eye: left	tumor location: posterior to equator	tumor diameter (mm): NA	tumor thickness (mm): 17	tumor cell type: mixed	retinal detachment: yes	extrascleral extension: no	chromosome 3 status: monosomy	months to endpoint: 18.89	metastasis: yes	total RNA	Trizol extraction of total RNA was performed according to the manufacturer's instructions. A cleanup with RNAII Nucleospin was conducted according Macherey Nagel recommendations	Biotin	Biotinylated cRNA were prepared according to the Affymetrix two round amplification protocol from 100ng total RNA (Expression Analysis Technical Manual, 2001, Affymetrix).	9606	Following fragmentation, 10 ug of labelled cRNA were hybridized for 16 hr on GeneChip Human Genome Array. GeneChips were washed and stained in the Affymetrix Fluidics Station FS450.	GeneChips were scanned using Affymetrix GeneChip GCS3000 scanner.	Gene expression data from Uveal Melanoma	Raw data were controlled using Genechip Operating Software and Affymetrix MAS5 algorithm to control the quality of hybridization and synthesis steps. Raw data were analysed using R/Bioconductor and normalized by GC-RMA method.	GPL570	Cecile,,Laurent	cecile.laurent@curie.fr	Institut Curie	26 rue d'ulm	Paris Cedex 05	75248	France	ftp://ftp.ncbi.nlm.nih.gov/geo/samples/GSM550nnn/GSM550670/suppl/GSM550670.CEL.gz	54675	62.12	monosomy	no	left	male	yes	18.89	yes
GSM550671	Uveal Melanoma MU197	GSM550671	Public on Dec 14 2010	Jun 04 2010	Dec 14 2010	RNA	1	Eye	Homo sapiens	tissue: Uveal Melanoma (eye)	age: 56.33	gender: male	eye: right	tumor location: posterior to equator	tumor diameter (mm): NA	tumor thickness (mm): 9.9	tumor cell type: epithelioid	retinal detachment: yes	extrascleral extension: no	chromosome 3 status: monosomy	months to endpoint: 7.33	metastasis: yes	total RNA	Trizol extraction of total RNA was performed according to the manufacturer's instructions. A cleanup with RNAII Nucleospin was conducted according Macherey Nagel recommendations	Biotin	Biotinylated cRNA were prepared according to the Affymetrix two round amplification protocol from 100ng total RNA (Expression Analysis Technical Manual, 2001, Affymetrix).	9606	Following fragmentation, 10 ug of labelled cRNA were hybridized for 16 hr on GeneChip Human Genome Array. GeneChips were washed and stained in the Affymetrix Fluidics Station FS450.	GeneChips were scanned using Affymetrix GeneChip GCS3000 scanner.	Gene expression data from Uveal Melanoma	Raw data were controlled using Genechip Operating Software and Affymetrix MAS5 algorithm to control the quality of hybridization and synthesis steps. Raw data were analysed using R/Bioconductor and normalized by GC-RMA method.	GPL570	Cecile,,Laurent	cecile.laurent@curie.fr	Institut Curie	26 rue d'ulm	Paris Cedex 05	75248	France	ftp://ftp.ncbi.nlm.nih.gov/geo/samples/GSM550nnn/GSM550671/suppl/GSM550671.CEL.gz	54675	56.33	monosomy	no	right	male	yes	7.33	yes
GSM550672	Uveal Melanoma MU205	GSM550672	Public on Dec 14 2010	Jun 04 2010	Dec 14 2010	RNA	1	Eye	Homo sapiens	tissue: Uveal Melanoma (eye)	age: 68.36	gender: male	eye: right	tumor location: on equator	tumor diameter (mm): 17	tumor thickness (mm): 11.5	tumor cell type: mixed	retinal detachment: no	extrascleral extension: yes	chromosome 3 status: disomy	months to endpoint: 35.55	metastasis: yes	total RNA	Trizol extraction of total RNA was performed according to the manufacturer's instructions. A cleanup with RNAII Nucleospin was conducted according Macherey Nagel recommendations	Biotin	Biotinylated cRNA were prepared according to the Affymetrix two round amplification protocol from 100ng total RNA (Expression Analysis Technical Manual, 2001, Affymetrix).	9606	Following fragmentation, 10 ug of labelled cRNA were hybridized for 16 hr on GeneChip Human Genome Array. GeneChips were washed and stained in the Affymetrix Fluidics Station FS450.	GeneChips were scanned using Affymetrix GeneChip GCS3000 scanner.	Gene expression data from Uveal Melanoma	Raw data were controlled using Genechip Operating Software and Affymetrix MAS5 algorithm to control the quality of hybridization and synthesis steps. Raw data were analysed using R/Bioconductor and normalized by GC-RMA method.	GPL570	Cecile,,Laurent	cecile.laurent@curie.fr	Institut Curie	26 rue d'ulm	Paris Cedex 05	75248	France	ftp://ftp.ncbi.nlm.nih.gov/geo/samples/GSM550nnn/GSM550672/suppl/GSM550672.CEL.gz	54675	68.36	disomy	yes	right	male	yes	35.55	no
GSM550673	Uveal Melanoma MU206	GSM550673	Public on Dec 14 2010	Jun 04 2010	Dec 14 2010	RNA	1	Eye	Homo sapiens	tissue: Uveal Melanoma (eye)	age: 69.05	gender: male	eye: right	tumor location: posterior to equator	tumor diameter (mm): NA	tumor thickness (mm): 13	tumor cell type: epithelioid	retinal detachment: NA	extrascleral extension: no	chromosome 3 status: monosomy	months to endpoint: 8.34	metastasis: yes	total RNA	Trizol extraction of total RNA was performed according to the manufacturer's instructions. A cleanup with RNAII Nucleospin was conducted according Macherey Nagel recommendations	Biotin	Biotinylated cRNA were prepared according to the Affymetrix two round amplification protocol from 100ng total RNA (Expression Analysis Technical Manual, 2001, Affymetrix).	9606	Following fragmentation, 10 ug of labelled cRNA were hybridized for 16 hr on GeneChip Human Genome Array. GeneChips were washed and stained in the Affymetrix Fluidics Station FS450.	GeneChips were scanned using Affymetrix GeneChip GCS3000 scanner.	Gene expression data from Uveal Melanoma	Raw data were controlled using Genechip Operating Software and Affymetrix MAS5 algorithm to control the quality of hybridization and synthesis steps. Raw data were analysed using R/Bioconductor and normalized by GC-RMA method.	GPL570	Cecile,,Laurent	cecile.laurent@curie.fr	Institut Curie	26 rue d'ulm	Paris Cedex 05	75248	France	ftp://ftp.ncbi.nlm.nih.gov/geo/samples/GSM550nnn/GSM550673/suppl/GSM550673.CEL.gz	54675	69.05	monosomy	no	right	male	yes	8.34	NA
GSM550674	Uveal Melanoma MU207	GSM550674	Public on Dec 14 2010	Jun 04 2010	Dec 14 2010	RNA	1	Eye	Homo sapiens	tissue: Uveal Melanoma (eye)	age: 50.17	gender: male	eye: right	tumor location: on equator	tumor diameter (mm): 10	tumor thickness (mm): 9	tumor cell type: epithelioid	retinal detachment: yes	extrascleral extension: no	chromosome 3 status: disomy	months to endpoint: 31.18	metastasis: no	total RNA	Trizol extraction of total RNA was performed according to the manufacturer's instructions. A cleanup with RNAII Nucleospin was conducted according Macherey Nagel recommendations	Biotin	Biotinylated cRNA were prepared according to the Affymetrix two round amplification protocol from 100ng total RNA (Expression Analysis Technical Manual, 2001, Affymetrix).	9606	Following fragmentation, 10 ug of labelled cRNA were hybridized for 16 hr on GeneChip Human Genome Array. GeneChips were washed and stained in the Affymetrix Fluidics Station FS450.	GeneChips were scanned using Affymetrix GeneChip GCS3000 scanner.	Gene expression data from Uveal Melanoma	Raw data were controlled using Genechip Operating Software and Affymetrix MAS5 algorithm to control the quality of hybridization and synthesis steps. Raw data were analysed using R/Bioconductor and normalized by GC-RMA method.	GPL570	Cecile,,Laurent	cecile.laurent@curie.fr	Institut Curie	26 rue d'ulm	Paris Cedex 05	75248	France	ftp://ftp.ncbi.nlm.nih.gov/geo/samples/GSM550nnn/GSM550674/suppl/GSM550674.CEL.gz	54675	50.17	disomy	no	right	male	no	31.18	yes
GSM550675	Uveal Melanoma MU208	GSM550675	Public on Dec 14 2010	Jun 04 2010	Dec 14 2010	RNA	1	Eye	Homo sapiens	tissue: Uveal Melanoma (eye)	age: 56.25	gender: female	eye: right	tumor location: on equator	tumor diameter (mm): 15	tumor thickness (mm): 11	tumor cell type: epithelioid	retinal detachment: yes	extrascleral extension: no	chromosome 3 status: disomy	months to endpoint: 67.38	metastasis: no	total RNA	Trizol extraction of total RNA was performed according to the manufacturer's instructions. A cleanup with RNAII Nucleospin was conducted according Macherey Nagel recommendations	Biotin	Biotinylated cRNA were prepared according to the Affymetrix two round amplification protocol from 100ng total RNA (Expression Analysis Technical Manual, 2001, Affymetrix).	9606	Following fragmentation, 10 ug of labelled cRNA were hybridized for 16 hr on GeneChip Human Genome Array. GeneChips were washed and stained in the Affymetrix Fluidics Station FS450.	GeneChips were scanned using Affymetrix GeneChip GCS3000 scanner.	Gene expression data from Uveal Melanoma	Raw data were controlled using Genechip Operating Software and Affymetrix MAS5 algorithm to control the quality of hybridization and synthesis steps. Raw data were analysed using R/Bioconductor and normalized by GC-RMA method.	GPL570	Cecile,,Laurent	cecile.laurent@curie.fr	Institut Curie	26 rue d'ulm	Paris Cedex 05	75248	France	ftp://ftp.ncbi.nlm.nih.gov/geo/samples/GSM550nnn/GSM550675/suppl/GSM550675.CEL.gz	54675	56.25	disomy	no	right	female	no	67.38	yes
GSM550676	Uveal Melanoma MU209	GSM550676	Public on Dec 14 2010	Jun 04 2010	Dec 14 2010	RNA	1	Eye	Homo sapiens	tissue: Uveal Melanoma (eye)	age: 82.79	gender: female	eye: right	tumor location: on equator	tumor diameter (mm): 17	tumor thickness (mm): 13.2	tumor cell type: NA	retinal detachment: no	extrascleral extension: no	chromosome 3 status: monosomy	months to endpoint: 31.54	metastasis: no	total RNA	Trizol extraction of total RNA was performed according to the manufacturer's instructions. A cleanup with RNAII Nucleospin was conducted according Macherey Nagel recommendations	Biotin	Biotinylated cRNA were prepared according to the Affymetrix two round amplification protocol from 100ng total RNA (Expression Analysis Technical Manual, 2001, Affymetrix).	9606	Following fragmentation, 10 ug of labelled cRNA were hybridized for 16 hr on GeneChip Human Genome Array. GeneChips were washed and stained in the Affymetrix Fluidics Station FS450.	GeneChips were scanned using Affymetrix GeneChip GCS3000 scanner.	Gene expression data from Uveal Melanoma	Raw data were controlled using Genechip Operating Software and Affymetrix MAS5 algorithm to control the quality of hybridization and synthesis steps. Raw data were analysed using R/Bioconductor and normalized by GC-RMA method.	GPL570	Cecile,,Laurent	cecile.laurent@curie.fr	Institut Curie	26 rue d'ulm	Paris Cedex 05	75248	France	ftp://ftp.ncbi.nlm.nih.gov/geo/samples/GSM550nnn/GSM550676/suppl/GSM550676.CEL.gz	54675	82.79	monosomy	no	right	female	no	31.54	no
GSM550677	Uveal Melanoma MU210	GSM550677	Public on Dec 14 2010	Jun 04 2010	Dec 14 2010	RNA	1	Eye	Homo sapiens	tissue: Uveal Melanoma (eye)	age: 70.26	gender: male	eye: right	tumor location: on equator	tumor diameter (mm): 15	tumor thickness (mm): 13	tumor cell type: mixed	retinal detachment: yes	extrascleral extension: no	chromosome 3 status: disomy	months to endpoint: 6.18	metastasis: yes	total RNA	Trizol extraction of total RNA was performed according to the manufacturer's instructions. A cleanup with RNAII Nucleospin was conducted according Macherey Nagel recommendations	Biotin	Biotinylated cRNA were prepared according to the Affymetrix two round amplification protocol from 100ng total RNA (Expression Analysis Technical Manual, 2001, Affymetrix).	9606	Following fragmentation, 10 ug of labelled cRNA were hybridized for 16 hr on GeneChip Human Genome Array. GeneChips were washed and stained in the Affymetrix Fluidics Station FS450.	GeneChips were scanned using Affymetrix GeneChip GCS3000 scanner.	Gene expression data from Uveal Melanoma	Raw data were controlled using Genechip Operating Software and Affymetrix MAS5 algorithm to control the quality of hybridization and synthesis steps. Raw data were analysed using R/Bioconductor and normalized by GC-RMA method.	GPL570	Cecile,,Laurent	cecile.laurent@curie.fr	Institut Curie	26 rue d'ulm	Paris Cedex 05	75248	France	ftp://ftp.ncbi.nlm.nih.gov/geo/samples/GSM550nnn/GSM550677/suppl/GSM550677.CEL.gz	54675	70.26	disomy	no	right	male	yes	6.18	yes
GSM550678	Uveal Melanoma MU211	GSM550678	Public on Dec 14 2010	Jun 04 2010	Dec 14 2010	RNA	1	Eye	Homo sapiens	tissue: Uveal Melanoma (eye)	age: 80.66	gender: male	eye: left	tumor location: on equator	tumor diameter (mm): 18	tumor thickness (mm): 11	tumor cell type: NA	retinal detachment: no	extrascleral extension: no	chromosome 3 status: monosomy	months to endpoint: 9.3	metastasis: no	total RNA	Trizol extraction of total RNA was performed according to the manufacturer's instructions. A cleanup with RNAII Nucleospin was conducted according Macherey Nagel recommendations	Biotin	Biotinylated cRNA were prepared according to the Affymetrix two round amplification protocol from 100ng total RNA (Expression Analysis Technical Manual, 2001, Affymetrix).	9606	Following fragmentation, 10 ug of labelled cRNA were hybridized for 16 hr on GeneChip Human Genome Array. GeneChips were washed and stained in the Affymetrix Fluidics Station FS450.	GeneChips were scanned using Affymetrix GeneChip GCS3000 scanner.	Gene expression data from Uveal Melanoma	Raw data were controlled using Genechip Operating Software and Affymetrix MAS5 algorithm to control the quality of hybridization and synthesis steps. Raw data were analysed using R/Bioconductor and normalized by GC-RMA method.	GPL570	Cecile,,Laurent	cecile.laurent@curie.fr	Institut Curie	26 rue d'ulm	Paris Cedex 05	75248	France	ftp://ftp.ncbi.nlm.nih.gov/geo/samples/GSM550nnn/GSM550678/suppl/GSM550678.CEL.gz	54675	80.66	monosomy	no	left	male	no	9.3	no
GSM550679	Uveal Melanoma MU212	GSM550679	Public on Dec 14 2010	Jun 04 2010	Dec 14 2010	RNA	1	Eye	Homo sapiens	tissue: Uveal Melanoma (eye)	age: 50.17	gender: male	eye: left	tumor location: on equator	tumor diameter (mm): 19.6	tumor thickness (mm): 13.6	tumor cell type: epithelioid	retinal detachment: yes	extrascleral extension: no	chromosome 3 status: monosomy	months to endpoint: 17.61	metastasis: yes	total RNA	Trizol extraction of total RNA was performed according to the manufacturer's instructions. A cleanup with RNAII Nucleospin was conducted according Macherey Nagel recommendations	Biotin	Biotinylated cRNA were prepared according to the Affymetrix two round amplification protocol from 100ng total RNA (Expression Analysis Technical Manual, 2001, Affymetrix).	9606	Following fragmentation, 10 ug of labelled cRNA were hybridized for 16 hr on GeneChip Human Genome Array. GeneChips were washed and stained in the Affymetrix Fluidics Station FS450.	GeneChips were scanned using Affymetrix GeneChip GCS3000 scanner.	Gene expression data from Uveal Melanoma	Raw data were controlled using Genechip Operating Software and Affymetrix MAS5 algorithm to control the quality of hybridization and synthesis steps. Raw data were analysed using R/Bioconductor and normalized by GC-RMA method.	GPL570	Cecile,,Laurent	cecile.laurent@curie.fr	Institut Curie	26 rue d'ulm	Paris Cedex 05	75248	France	ftp://ftp.ncbi.nlm.nih.gov/geo/samples/GSM550nnn/GSM550679/suppl/GSM550679.CEL.gz	54675	50.17	monosomy	no	left	male	yes	17.61	yes
GSM550680	Uveal Melanoma MU213	GSM550680	Public on Dec 14 2010	Jun 04 2010	Dec 14 2010	RNA	1	Eye	Homo sapiens	tissue: Uveal Melanoma (eye)	age: 66.26	gender: male	eye: left	tumor location: on equator	tumor diameter (mm): 15	tumor thickness (mm): 10.5	tumor cell type: epithelioid	retinal detachment: NA	extrascleral extension: no	chromosome 3 status: disomy	months to endpoint: 31.74	metastasis: no	total RNA	Trizol extraction of total RNA was performed according to the manufacturer's instructions. A cleanup with RNAII Nucleospin was conducted according Macherey Nagel recommendations	Biotin	Biotinylated cRNA were prepared according to the Affymetrix two round amplification protocol from 100ng total RNA (Expression Analysis Technical Manual, 2001, Affymetrix).	9606	Following fragmentation, 10 ug of labelled cRNA were hybridized for 16 hr on GeneChip Human Genome Array. GeneChips were washed and stained in the Affymetrix Fluidics Station FS450.	GeneChips were scanned using Affymetrix GeneChip GCS3000 scanner.	Gene expression data from Uveal Melanoma	Raw data were controlled using Genechip Operating Software and Affymetrix MAS5 algorithm to control the quality of hybridization and synthesis steps. Raw data were analysed using R/Bioconductor and normalized by GC-RMA method.	GPL570	Cecile,,Laurent	cecile.laurent@curie.fr	Institut Curie	26 rue d'ulm	Paris Cedex 05	75248	France	ftp://ftp.ncbi.nlm.nih.gov/geo/samples/GSM550nnn/GSM550680/suppl/GSM550680.CEL.gz	54675	66.26	disomy	no	left	male	no	31.74	NA
GSM550681	Uveal Melanoma MU214	GSM550681	Public on Dec 14 2010	Jun 04 2010	Dec 14 2010	RNA	1	Eye	Homo sapiens	tissue: Uveal Melanoma (eye)	age: 56.1	gender: female	eye: left	tumor location: on equator	tumor diameter (mm): 12	tumor thickness (mm): 13.7	tumor cell type: epithelioid	retinal detachment: yes	extrascleral extension: no	chromosome 3 status: monosomy	months to endpoint: 50.46	metastasis: no	total RNA	Trizol extraction of total RNA was performed according to the manufacturer's instructions. A cleanup with RNAII Nucleospin was conducted according Macherey Nagel recommendations	Biotin	Biotinylated cRNA were prepared according to the Affymetrix two round amplification protocol from 100ng total RNA (Expression Analysis Technical Manual, 2001, Affymetrix).	9606	Following fragmentation, 10 ug of labelled cRNA were hybridized for 16 hr on GeneChip Human Genome Array. GeneChips were washed and stained in the Affymetrix Fluidics Station FS450.	GeneChips were scanned using Affymetrix GeneChip GCS3000 scanner.	Gene expression data from Uveal Melanoma	Raw data were controlled using Genechip Operating Software and Affymetrix MAS5 algorithm to control the quality of hybridization and synthesis steps. Raw data were analysed using R/Bioconductor and normalized by GC-RMA method.	GPL570	Cecile,,Laurent	cecile.laurent@curie.fr	Institut Curie	26 rue d'ulm	Paris Cedex 05	75248	France	ftp://ftp.ncbi.nlm.nih.gov/geo/samples/GSM550nnn/GSM550681/suppl/GSM550681.CEL.gz	54675	56.1	monosomy	no	left	female	no	50.46	yes
GSM550682	Uveal Melanoma MU215	GSM550682	Public on Dec 14 2010	Jun 04 2010	Dec 14 2010	RNA	1	Eye	Homo sapiens	tissue: Uveal Melanoma (eye)	age: 64.55	gender: male	eye: left	tumor location: on equator	tumor diameter (mm): 10	tumor thickness (mm): 15	tumor cell type: mixed	retinal detachment: yes	extrascleral extension: no	chromosome 3 status: monosomy	months to endpoint: 14.85	metastasis: yes	total RNA	Trizol extraction of total RNA was performed according to the manufacturer's instructions. A cleanup with RNAII Nucleospin was conducted according Macherey Nagel recommendations	Biotin	Biotinylated cRNA were prepared according to the Affymetrix two round amplification protocol from 100ng total RNA (Expression Analysis Technical Manual, 2001, Affymetrix).	9606	Following fragmentation, 10 ug of labelled cRNA were hybridized for 16 hr on GeneChip Human Genome Array. GeneChips were washed and stained in the Affymetrix Fluidics Station FS450.	GeneChips were scanned using Affymetrix GeneChip GCS3000 scanner.	Gene expression data from Uveal Melanoma	Raw data were controlled using Genechip Operating Software and Affymetrix MAS5 algorithm to control the quality of hybridization and synthesis steps. Raw data were analysed using R/Bioconductor and normalized by GC-RMA method.	GPL570	Cecile,,Laurent	cecile.laurent@curie.fr	Institut Curie	26 rue d'ulm	Paris Cedex 05	75248	France	ftp://ftp.ncbi.nlm.nih.gov/geo/samples/GSM550nnn/GSM550682/suppl/GSM550682.CEL.gz	54675	64.55	monosomy	no	left	male	yes	14.85	yes
GSM550683	Uveal Melanoma MU216	GSM550683	Public on Dec 14 2010	Jun 04 2010	Dec 14 2010	RNA	1	Eye	Homo sapiens	tissue: Uveal Melanoma (eye)	age: 60.35	gender: male	eye: left	tumor location: on equator	tumor diameter (mm): 16	tumor thickness (mm): 12.5	tumor cell type: NA	retinal detachment: yes	extrascleral extension: yes	chromosome 3 status: disomy	months to endpoint: 36.9	metastasis: yes	total RNA	Trizol extraction of total RNA was performed according to the manufacturer's instructions. A cleanup with RNAII Nucleospin was conducted according Macherey Nagel recommendations	Biotin	Biotinylated cRNA were prepared according to the Affymetrix two round amplification protocol from 100ng total RNA (Expression Analysis Technical Manual, 2001, Affymetrix).	9606	Following fragmentation, 10 ug of labelled cRNA were hybridized for 16 hr on GeneChip Human Genome Array. GeneChips were washed and stained in the Affymetrix Fluidics Station FS450.	GeneChips were scanned using Affymetrix GeneChip GCS3000 scanner.	Gene expression data from Uveal Melanoma	Raw data were controlled using Genechip Operating Software and Affymetrix MAS5 algorithm to control the quality of hybridization and synthesis steps. Raw data were analysed using R/Bioconductor and normalized by GC-RMA method.	GPL570	Cecile,,Laurent	cecile.laurent@curie.fr	Institut Curie	26 rue d'ulm	Paris Cedex 05	75248	France	ftp://ftp.ncbi.nlm.nih.gov/geo/samples/GSM550nnn/GSM550683/suppl/GSM550683.CEL.gz	54675	60.35	disomy	yes	left	male	yes	36.9	yes
GSM550684	Uveal Melanoma MU217	GSM550684	Public on Dec 14 2010	Jun 04 2010	Dec 14 2010	RNA	1	Eye	Homo sapiens	tissue: Uveal Melanoma (eye)	age: 65.72	gender: female	eye: left	tumor location: on equator	tumor diameter (mm): 20	tumor thickness (mm): 14	tumor cell type: mixed	retinal detachment: no	extrascleral extension: no	chromosome 3 status: monosomy	months to endpoint: 44.39	metastasis: yes	total RNA	Trizol extraction of total RNA was performed according to the manufacturer's instructions. A cleanup with RNAII Nucleospin was conducted according Macherey Nagel recommendations	Biotin	Biotinylated cRNA were prepared according to the Affymetrix two round amplification protocol from 100ng total RNA (Expression Analysis Technical Manual, 2001, Affymetrix).	9606	Following fragmentation, 10 ug of labelled cRNA were hybridized for 16 hr on GeneChip Human Genome Array. GeneChips were washed and stained in the Affymetrix Fluidics Station FS450.	GeneChips were scanned using Affymetrix GeneChip GCS3000 scanner.	Gene expression data from Uveal Melanoma	Raw data were controlled using Genechip Operating Software and Affymetrix MAS5 algorithm to control the quality of hybridization and synthesis steps. Raw data were analysed using R/Bioconductor and normalized by GC-RMA method.	GPL570	Cecile,,Laurent	cecile.laurent@curie.fr	Institut Curie	26 rue d'ulm	Paris Cedex 05	75248	France	ftp://ftp.ncbi.nlm.nih.gov/geo/samples/GSM550nnn/GSM550684/suppl/GSM550684.CEL.gz	54675	65.72	monosomy	no	left	female	yes	44.39	no
GSM550685	Uveal Melanoma MU218	GSM550685	Public on Dec 14 2010	Jun 04 2010	Dec 14 2010	RNA	1	Eye	Homo sapiens	tissue: Uveal Melanoma (eye)	age: 73.13	gender: male	eye: right	tumor location: on equator	tumor diameter (mm): NA	tumor thickness (mm): 13	tumor cell type: NA	retinal detachment: NA	extrascleral extension: no	chromosome 3 status: monosomy	months to endpoint: 7.59	metastasis: yes	total RNA	Trizol extraction of total RNA was performed according to the manufacturer's instructions. A cleanup with RNAII Nucleospin was conducted according Macherey Nagel recommendations	Biotin	Biotinylated cRNA were prepared according to the Affymetrix two round amplification protocol from 100ng total RNA (Expression Analysis Technical Manual, 2001, Affymetrix).	9606	Following fragmentation, 10 ug of labelled cRNA were hybridized for 16 hr on GeneChip Human Genome Array. GeneChips were washed and stained in the Affymetrix Fluidics Station FS450.	GeneChips were scanned using Affymetrix GeneChip GCS3000 scanner.	Gene expression data from Uveal Melanoma	Raw data were controlled using Genechip Operating Software and Affymetrix MAS5 algorithm to control the quality of hybridization and synthesis steps. Raw data were analysed using R/Bioconductor and normalized by GC-RMA method.	GPL570	Cecile,,Laurent	cecile.laurent@curie.fr	Institut Curie	26 rue d'ulm	Paris Cedex 05	75248	France	ftp://ftp.ncbi.nlm.nih.gov/geo/samples/GSM550nnn/GSM550685/suppl/GSM550685.CEL.gz	54675	73.13	monosomy	no	right	male	yes	7.59	NA
[truncated: 5 more columns]

## Sheet: S8
phenodata of GSE44295
ID	title	geo_accession	status	submission_date	last_update_date	type	channel_count	source_name_ch1	organism_ch1	characteristics_ch1	characteristics_ch1.1	characteristics_ch1.2	characteristics_ch1.3	characteristics_ch1.4	molecule_ch1	extract_protocol_ch1	label_ch1	label_protocol_ch1	taxid_ch1	hyb_protocol	scan_protocol	data_processing	platform_id	contact_name	contact_email	contact_department	contact_institute	contact_address	contact_city	contact_state	contact_zip/postal_code	contact_country	supplementary_file	data_row_count	cell line:ch1	cell type:ch1	death with metastasis:ch1	gender:ch1	metastasis:ch1	survival (days):ch1
GSM1082563	RNA from primary UM 1	GSM1082563	Public on Feb 14 2013	Feb 13 2013	Feb 14 2013	RNA	1	primary uveal melanoma cells	Homo sapiens	cell type: primary uveal melanoma cells	gender: M	survival (days): 547	death with metastasis: 1	metastasis: 1	total RNA	RNA was extracted with mirVana kit (Ambion), followed by clean-up and DNase I treatment with QIAGEN RNeasy mini kit in accordance with the prescribed protocol provided with the kit.	biotin	Biotinylated cRNA were prepared with the Ambion MessageAmp kit for Illumina arrays	9606	Standard Illumina hybridization protocol	Standard Illumina scanning protocol	The data were normalised using quantile normalisation with background subtraction.	GPL6883	Li,,Zhang	mlizhang@gmail.com	Quantitative Health Sciences	CleveLAND CLINIC LERNER COL/MED-CWRU	9500 Euclid Ave, JJN3	Cleveland	OH	44124	USA	NONE	24526	NA	primary uveal melanoma cells	1	M	1	547
GSM1082564	RNA from MUM2B 2	GSM1082564	Public on Feb 14 2013	Feb 13 2013	Feb 14 2013	RNA	1	MUM2B uveal melanoma cell line	Homo sapiens	cell line: MUM2B uveal melanoma cell line	gender: unknown	survival (days): unknown	death with metastasis: .	metastasis: unknown	total RNA	RNA was extracted with mirVana kit (Ambion), followed by clean-up and DNase I treatment with QIAGEN RNeasy mini kit in accordance with the prescribed protocol provided with the kit.	biotin	Biotinylated cRNA were prepared with the Ambion MessageAmp kit for Illumina arrays	9606	Standard Illumina hybridization protocol	Standard Illumina scanning protocol	The data were normalised using quantile normalisation with background subtraction.	GPL6883	Li,,Zhang	mlizhang@gmail.com	Quantitative Health Sciences	CleveLAND CLINIC LERNER COL/MED-CWRU	9500 Euclid Ave, JJN3	Cleveland	OH	44124	USA	NONE	24526	MUM2B uveal melanoma cell line	NA	.	unknown	unknown	unknown
GSM1082565	RNA from primary UM 3	GSM1082565	Public on Feb 14 2013	Feb 13 2013	Feb 14 2013	RNA	1	primary uveal melanoma cells	Homo sapiens	cell type: primary uveal melanoma cells	gender: M	survival (days): 2799	death with metastasis: 0	metastasis: 0	total RNA	RNA was extracted with mirVana kit (Ambion), followed by clean-up and DNase I treatment with QIAGEN RNeasy mini kit in accordance with the prescribed protocol provided with the kit.	biotin	Biotinylated cRNA were prepared with the Ambion MessageAmp kit for Illumina arrays	9606	Standard Illumina hybridization protocol	Standard Illumina scanning protocol	The data were normalised using quantile normalisation with background subtraction.	GPL6883	Li,,Zhang	mlizhang@gmail.com	Quantitative Health Sciences	CleveLAND CLINIC LERNER COL/MED-CWRU	9500 Euclid Ave, JJN3	Cleveland	OH	44124	USA	NONE	24526	NA	primary uveal melanoma cells	0	M	0	2799
GSM1082566	RNA from primary UM 4	GSM1082566	Public on Feb 14 2013	Feb 13 2013	Feb 14 2013	RNA	1	primary uveal melanoma cells	Homo sapiens	cell type: primary uveal melanoma cells	gender: M	survival (days): 548	death with metastasis: 1	metastasis: 1	total RNA	RNA was extracted with mirVana kit (Ambion), followed by clean-up and DNase I treatment with QIAGEN RNeasy mini kit in accordance with the prescribed protocol provided with the kit.	biotin	Biotinylated cRNA were prepared with the Ambion MessageAmp kit for Illumina arrays	9606	Standard Illumina hybridization protocol	Standard Illumina scanning protocol	The data were normalised using quantile normalisation with background subtraction.	GPL6883	Li,,Zhang	mlizhang@gmail.com	Quantitative Health Sciences	CleveLAND CLINIC LERNER COL/MED-CWRU	9500 Euclid Ave, JJN3	Cleveland	OH	44124	USA	NONE	24526	NA	primary uveal melanoma cells	1	M	1	548
GSM1082567	RNA from OCM1A 5	GSM1082567	Public on Feb 14 2013	Feb 13 2013	Feb 14 2013	RNA	1	OCM1A uveal melanoma cell line	Homo sapiens	cell line: OCM1A uveal melanoma cell line	gender: unknown	survival (days): unknown	death with metastasis: .	metastasis: unknown	total RNA	RNA was extracted with mirVana kit (Ambion), followed by clean-up and DNase I treatment with QIAGEN RNeasy mini kit in accordance with the prescribed protocol provided with the kit.	biotin	Biotinylated cRNA were prepared with the Ambion MessageAmp kit for Illumina arrays	9606	Standard Illumina hybridization protocol	Standard Illumina scanning protocol	The data were normalised using quantile normalisation with background subtraction.	GPL6883	Li,,Zhang	mlizhang@gmail.com	Quantitative Health Sciences	CleveLAND CLINIC LERNER COL/MED-CWRU	9500 Euclid Ave, JJN3	Cleveland	OH	44124	USA	NONE	24526	OCM1A uveal melanoma cell line	NA	.	unknown	unknown	unknown
GSM1082568	RNA from primary UM 6	GSM1082568	Public on Feb 14 2013	Feb 13 2013	Feb 14 2013	RNA	1	primary uveal melanoma cells	Homo sapiens	cell type: primary uveal melanoma cells	gender: M	survival (days): 731	death with metastasis: 1	metastasis: 1	total RNA	RNA was extracted with mirVana kit (Ambion), followed by clean-up and DNase I treatment with QIAGEN RNeasy mini kit in accordance with the prescribed protocol provided with the kit.	biotin	Biotinylated cRNA were prepared with the Ambion MessageAmp kit for Illumina arrays	9606	Standard Illumina hybridization protocol	Standard Illumina scanning protocol	The data were normalised using quantile normalisation with background subtraction.	GPL6883	Li,,Zhang	mlizhang@gmail.com	Quantitative Health Sciences	CleveLAND CLINIC LERNER COL/MED-CWRU	9500 Euclid Ave, JJN3	Cleveland	OH	44124	USA	NONE	24526	NA	primary uveal melanoma cells	1	M	1	731
GSM1082569	RNA from primary UM 7	GSM1082569	Public on Feb 14 2013	Feb 13 2013	Feb 14 2013	RNA	1	primary uveal melanoma cells	Homo sapiens	cell type: primary uveal melanoma cells	gender: M	survival (days): 1644	death with metastasis: 0	metastasis: 0	total RNA	RNA was extracted with mirVana kit (Ambion), followed by clean-up and DNase I treatment with QIAGEN RNeasy mini kit in accordance with the prescribed protocol provided with the kit.	biotin	Biotinylated cRNA were prepared with the Ambion MessageAmp kit for Illumina arrays	9606	Standard Illumina hybridization protocol	Standard Illumina scanning protocol	The data were normalised using quantile normalisation with background subtraction.	GPL6883	Li,,Zhang	mlizhang@gmail.com	Quantitative Health Sciences	CleveLAND CLINIC LERNER COL/MED-CWRU	9500 Euclid Ave, JJN3	Cleveland	OH	44124	USA	NONE	24526	NA	primary uveal melanoma cells	0	M	0	1644
GSM1082570	RNA from primary UM 8	GSM1082570	Public on Feb 14 2013	Feb 13 2013	Feb 14 2013	RNA	1	primary uveal melanoma cells	Homo sapiens	cell type: primary uveal melanoma cells	gender: F	survival (days): 457	death with metastasis: 1	metastasis: 1	total RNA	RNA was extracted with mirVana kit (Ambion), followed by clean-up and DNase I treatment with QIAGEN RNeasy mini kit in accordance with the prescribed protocol provided with the kit.	biotin	Biotinylated cRNA were prepared with the Ambion MessageAmp kit for Illumina arrays	9606	Standard Illumina hybridization protocol	Standard Illumina scanning protocol	The data were normalised using quantile normalisation with background subtraction.	GPL6883	Li,,Zhang	mlizhang@gmail.com	Quantitative Health Sciences	CleveLAND CLINIC LERNER COL/MED-CWRU	9500 Euclid Ave, JJN3	Cleveland	OH	44124	USA	NONE	24526	NA	primary uveal melanoma cells	1	F	1	457
GSM1082571	RNA from primary UM 9	GSM1082571	Public on Feb 14 2013	Feb 13 2013	Feb 14 2013	RNA	1	primary uveal melanoma cells	Homo sapiens	cell type: primary uveal melanoma cells	gender: M	survival (days): 60	death with metastasis: 1	metastasis: 1	total RNA	RNA was extracted with mirVana kit (Ambion), followed by clean-up and DNase I treatment with QIAGEN RNeasy mini kit in accordance with the prescribed protocol provided with the kit.	biotin	Biotinylated cRNA were prepared with the Ambion MessageAmp kit for Illumina arrays	9606	Standard Illumina hybridization protocol	Standard Illumina scanning protocol	The data were normalised using quantile normalisation with background subtraction.	GPL6883	Li,,Zhang	mlizhang@gmail.com	Quantitative Health Sciences	CleveLAND CLINIC LERNER COL/MED-CWRU	9500 Euclid Ave, JJN3	Cleveland	OH	44124	USA	NONE	24526	NA	primary uveal melanoma cells	1	M	1	60
GSM1082572	RNA from primary UM 10	GSM1082572	Public on Feb 14 2013	Feb 13 2013	Feb 14 2013	RNA	1	primary uveal melanoma cells	Homo sapiens	cell type: primary uveal melanoma cells	gender: F	survival (days): 457	death with metastasis: 0	metastasis: 0	total RNA	RNA was extracted with mirVana kit (Ambion), followed by clean-up and DNase I treatment with QIAGEN RNeasy mini kit in accordance with the prescribed protocol provided with the kit.	biotin	Biotinylated cRNA were prepared with the Ambion MessageAmp kit for Illumina arrays	9606	Standard Illumina hybridization protocol	Standard Illumina scanning protocol	The data were normalised using quantile normalisation with background subtraction.	GPL6883	Li,,Zhang	mlizhang@gmail.com	Quantitative Health Sciences	CleveLAND CLINIC LERNER COL/MED-CWRU	9500 Euclid Ave, JJN3	Cleveland	OH	44124	USA	NONE	24526	NA	primary uveal melanoma cells	0	F	0	457
GSM1082573	RNA from primary UM 11	GSM1082573	Public on Feb 14 2013	Feb 13 2013	Feb 14 2013	RNA	1	primary uveal melanoma cells	Homo sapiens	cell type: primary uveal melanoma cells	gender: unknown	survival (days): unknown	death with metastasis: .	metastasis: unknown	total RNA	RNA was extracted with mirVana kit (Ambion), followed by clean-up and DNase I treatment with QIAGEN RNeasy mini kit in accordance with the prescribed protocol provided with the kit.	biotin	Biotinylated cRNA were prepared with the Ambion MessageAmp kit for Illumina arrays	9606	Standard Illumina hybridization protocol	Standard Illumina scanning protocol	The data were normalised using quantile normalisation with background subtraction.	GPL6883	Li,,Zhang	mlizhang@gmail.com	Quantitative Health Sciences	CleveLAND CLINIC LERNER COL/MED-CWRU	9500 Euclid Ave, JJN3	Cleveland	OH	44124	USA	NONE	24526	NA	primary uveal melanoma cells	.	unknown	unknown	unknown
GSM1082574	RNA from primary UM 12	GSM1082574	Public on Feb 14 2013	Feb 13 2013	Feb 14 2013	RNA	1	primary uveal melanoma cells	Homo sapiens	cell type: primary uveal melanoma cells	gender: M	survival (days): 2284	death with metastasis: 0	metastasis: 0	total RNA	RNA was extracted with mirVana kit (Ambion), followed by clean-up and DNase I treatment with QIAGEN RNeasy mini kit in accordance with the prescribed protocol provided with the kit.	biotin	Biotinylated cRNA were prepared with the Ambion MessageAmp kit for Illumina arrays	9606	Standard Illumina hybridization protocol	Standard Illumina scanning protocol	The data were normalised using quantile normalisation with background subtraction.	GPL6883	Li,,Zhang	mlizhang@gmail.com	Quantitative Health Sciences	CleveLAND CLINIC LERNER COL/MED-CWRU	9500 Euclid Ave, JJN3	Cleveland	OH	44124	USA	NONE	24526	NA	primary uveal melanoma cells	0	M	0	2284
GSM1082575	RNA from primary UM 13	GSM1082575	Public on Feb 14 2013	Feb 13 2013	Feb 14 2013	RNA	1	primary uveal melanoma cells	Homo sapiens	cell type: primary uveal melanoma cells	gender: M	survival (days): 1796	death with metastasis: 0	metastasis: 0	total RNA	RNA was extracted with mirVana kit (Ambion), followed by clean-up and DNase I treatment with QIAGEN RNeasy mini kit in accordance with the prescribed protocol provided with the kit.	biotin	Biotinylated cRNA were prepared with the Ambion MessageAmp kit for Illumina arrays	9606	Standard Illumina hybridization protocol	Standard Illumina scanning protocol	The data were normalised using quantile normalisation with background subtraction.	GPL6883	Li,,Zhang	mlizhang@gmail.com	Quantitative Health Sciences	CleveLAND CLINIC LERNER COL/MED-CWRU	9500 Euclid Ave, JJN3	Cleveland	OH	44124	USA	NONE	24526	NA	primary uveal melanoma cells	0	M	0	1796
GSM1082576	RNA from NCSC 14	GSM1082576	Public on Feb 14 2013	Feb 13 2013	Feb 14 2013	RNA	1	neural crest stem cells	Homo sapiens	cell type: neural crest stem cells	gender: unknown	survival (days): unknown	death with metastasis: .	metastasis: unknown	total RNA	RNA was extracted with mirVana kit (Ambion), followed by clean-up and DNase I treatment with QIAGEN RNeasy mini kit in accordance with the prescribed protocol provided with the kit.	biotin	Biotinylated cRNA were prepared with the Ambion MessageAmp kit for Illumina arrays	9606	Standard Illumina hybridization protocol	Standard Illumina scanning protocol	The data were normalised using quantile normalisation with background subtraction.	GPL6883	Li,,Zhang	mlizhang@gmail.com	Quantitative Health Sciences	CleveLAND CLINIC LERNER COL/MED-CWRU	9500 Euclid Ave, JJN3	Cleveland	OH	44124	USA	NONE	24526	NA	neural crest stem cells	.	unknown	unknown	unknown
GSM1082577	RNA from primary UM 15	GSM1082577	Public on Feb 14 2013	Feb 13 2013	Feb 14 2013	RNA	1	primary uveal melanoma cells	Homo sapiens	cell type: primary uveal melanoma cells	gender: F	survival (days): 518	death with metastasis: 0	metastasis: 0	total RNA	RNA was extracted with mirVana kit (Ambion), followed by clean-up and DNase I treatment with QIAGEN RNeasy mini kit in accordance with the prescribed protocol provided with the kit.	biotin	Biotinylated cRNA were prepared with the Ambion MessageAmp kit for Illumina arrays	9606	Standard Illumina hybridization protocol	Standard Illumina scanning protocol	The data were normalised using quantile normalisation with background subtraction.	GPL6883	Li,,Zhang	mlizhang@gmail.com	Quantitative Health Sciences	CleveLAND CLINIC LERNER COL/MED-CWRU	9500 Euclid Ave, JJN3	Cleveland	OH	44124	USA	NONE	24526	NA	primary uveal melanoma cells	0	F	0	518
GSM1082578	RNA from primary UM 16	GSM1082578	Public on Feb 14 2013	Feb 13 2013	Feb 14 2013	RNA	1	primary uveal melanoma cells	Homo sapiens	cell type: primary uveal melanoma cells	gender: M	survival (days): 975	death with metastasis: 1	metastasis: 1	total RNA	RNA was extracted with mirVana kit (Ambion), followed by clean-up and DNase I treatment with QIAGEN RNeasy mini kit in accordance with the prescribed protocol provided with the kit.	biotin	Biotinylated cRNA were prepared with the Ambion MessageAmp kit for Illumina arrays	9606	Standard Illumina hybridization protocol	Standard Illumina scanning protocol	The data were normalised using quantile normalisation with background subtraction.	GPL6883	Li,,Zhang	mlizhang@gmail.com	Quantitative Health Sciences	CleveLAND CLINIC LERNER COL/MED-CWRU	9500 Euclid Ave, JJN3	Cleveland	OH	44124	USA	NONE	24526	NA	primary uveal melanoma cells	1	M	1	975
GSM1082579	RNA from primary UM 17	GSM1082579	Public on Feb 14 2013	Feb 13 2013	Feb 14 2013	RNA	1	primary uveal melanoma cells	Homo sapiens	cell type: primary uveal melanoma cells	gender: F	survival (days): 1278	death with metastasis: 1	metastasis: 1	total RNA	RNA was extracted with mirVana kit (Ambion), followed by clean-up and DNase I treatment with QIAGEN RNeasy mini kit in accordance with the prescribed protocol provided with the kit.	biotin	Biotinylated cRNA were prepared with the Ambion MessageAmp kit for Illumina arrays	9606	Standard Illumina hybridization protocol	Standard Illumina scanning protocol	The data were normalised using quantile normalisation with background subtraction.	GPL6883	Li,,Zhang	mlizhang@gmail.com	Quantitative Health Sciences	CleveLAND CLINIC LERNER COL/MED-CWRU	9500 Euclid Ave, JJN3	Cleveland	OH	44124	USA	NONE	24526	NA	primary uveal melanoma cells	1	F	1	1278
GSM1082580	RNA from primary UM 18	GSM1082580	Public on Feb 14 2013	Feb 13 2013	Feb 14 2013	RNA	1	primary uveal melanoma cells	Homo sapiens	cell type: primary uveal melanoma cells	gender: M	survival (days): 2434	death with metastasis: 0	metastasis: 0	total RNA	RNA was extracted with mirVana kit (Ambion), followed by clean-up and DNase I treatment with QIAGEN RNeasy mini kit in accordance with the prescribed protocol provided with the kit.	biotin	Biotinylated cRNA were prepared with the Ambion MessageAmp kit for Illumina arrays	9606	Standard Illumina hybridization protocol	Standard Illumina scanning protocol	The data were normalised using quantile normalisation with background subtraction.	GPL6883	Li,,Zhang	mlizhang@gmail.com	Quantitative Health Sciences	CleveLAND CLINIC LERNER COL/MED-CWRU	9500 Euclid Ave, JJN3	Cleveland	OH	44124	USA	NONE	24526	NA	primary uveal melanoma cells	0	M	0	2434
GSM1082581	RNA from primary UM 19	GSM1082581	Public on Feb 14 2013	Feb 13 2013	Feb 14 2013	RNA	1	primary uveal melanoma cells	Homo sapiens	cell type: primary uveal melanoma cells	gender: F	survival (days): 1766	death with metastasis: 0	metastasis: 0	total RNA	RNA was extracted with mirVana kit (Ambion), followed by clean-up and DNase I treatment with QIAGEN RNeasy mini kit in accordance with the prescribed protocol provided with the kit.	biotin	Biotinylated cRNA were prepared with the Ambion MessageAmp kit for Illumina arrays	9606	Standard Illumina hybridization protocol	Standard Illumina scanning protocol	The data were normalised using quantile normalisation with background subtraction.	GPL6883	Li,,Zhang	mlizhang@gmail.com	Quantitative Health Sciences	CleveLAND CLINIC LERNER COL/MED-CWRU	9500 Euclid Ave, JJN3	Cleveland	OH	44124	USA	NONE	24526	NA	primary uveal melanoma cells	0	F	0	1766
GSM1082582	RNA from primary UM 20	GSM1082582	Public on Feb 14 2013	Feb 13 2013	Feb 14 2013	RNA	1	primary uveal melanoma cells	Homo sapiens	cell type: primary uveal melanoma cells	gender: F	survival (days): 1614	death with metastasis: 0	metastasis: 0	total RNA	RNA was extracted with mirVana kit (Ambion), followed by clean-up and DNase I treatment with QIAGEN RNeasy mini kit in accordance with the prescribed protocol provided with the kit.	biotin	Biotinylated cRNA were prepared with the Ambion MessageAmp kit for Illumina arrays	9606	Standard Illumina hybridization protocol	Standard Illumina scanning protocol	The data were normalised using quantile normalisation with background subtraction.	GPL6883	Li,,Zhang	mlizhang@gmail.com	Quantitative Health Sciences	CleveLAND CLINIC LERNER COL/MED-CWRU	9500 Euclid Ave, JJN3	Cleveland	OH	44124	USA	NONE	24526	NA	primary uveal melanoma cells	0	F	0	1614
GSM1082583	RNA from primary UM 21	GSM1082583	Public on Feb 14 2013	Feb 13 2013	Feb 14 2013	RNA	1	primary uveal melanoma cells	Homo sapiens	cell type: primary uveal melanoma cells	gender: F	survival (days): 1583	death with metastasis: 0	metastasis: 0	total RNA	RNA was extracted with mirVana kit (Ambion), followed by clean-up and DNase I treatment with QIAGEN RNeasy mini kit in accordance with the prescribed protocol provided with the kit.	biotin	Biotinylated cRNA were prepared with the Ambion MessageAmp kit for Illumina arrays	9606	Standard Illumina hybridization protocol	Standard Illumina scanning protocol	The data were normalised using quantile normalisation with background subtraction.	GPL6883	Li,,Zhang	mlizhang@gmail.com	Quantitative Health Sciences	CleveLAND CLINIC LERNER COL/MED-CWRU	9500 Euclid Ave, JJN3	Cleveland	OH	44124	USA	NONE	24526	NA	primary uveal melanoma cells	0	F	0	1583
GSM1082584	RNA from primary UM 22	GSM1082584	Public on Feb 14 2013	Feb 13 2013	Feb 14 2013	RNA	1	primary uveal melanoma cells	Homo sapiens	cell type: primary uveal melanoma cells	gender: M	survival (days): 792	death with metastasis: 1	metastasis: 1	total RNA	RNA was extracted with mirVana kit (Ambion), followed by clean-up and DNase I treatment with QIAGEN RNeasy mini kit in accordance with the prescribed protocol provided with the kit.	biotin	Biotinylated cRNA were prepared with the Ambion MessageAmp kit for Illumina arrays	9606	Standard Illumina hybridization protocol	Standard Illumina scanning protocol	The data were normalised using quantile normalisation with background subtraction.	GPL6883	Li,,Zhang	mlizhang@gmail.com	Quantitative Health Sciences	CleveLAND CLINIC LERNER COL/MED-CWRU	9500 Euclid Ave, JJN3	Cleveland	OH	44124	USA	NONE	24526	NA	primary uveal melanoma cells	1	M	1	792
GSM1082585	RNA from ESC 23	GSM1082585	Public on Feb 14 2013	Feb 13 2013	Feb 14 2013	RNA	1	Embryonic Stem Cells	Homo sapiens	cell type: Embryonic Stem Cells	gender: unknown	survival (days): unknown	death with metastasis: .	metastasis: unknown	total RNA	RNA was extracted with mirVana kit (Ambion), followed by clean-up and DNase I treatment with QIAGEN RNeasy mini kit in accordance with the prescribed protocol provided with the kit.	biotin	Biotinylated cRNA were prepared with the Ambion MessageAmp kit for Illumina arrays	9606	Standard Illumina hybridization protocol	Standard Illumina scanning protocol	The data were normalised using quantile normalisation with background subtraction.	GPL6883	Li,,Zhang	mlizhang@gmail.com	Quantitative Health Sciences	CleveLAND CLINIC LERNER COL/MED-CWRU	9500 Euclid Ave, JJN3	Cleveland	OH	44124	USA	NONE	24526	NA	Embryonic Stem Cells	.	unknown	unknown	unknown
GSM1082586	RNA from primary UM 24	GSM1082586	Public on Feb 14 2013	Feb 13 2013	Feb 14 2013	RNA	1	primary uveal melanoma cells	Homo sapiens	cell type: primary uveal melanoma cells	gender: F	survival (days): 1157	death with metastasis: 1	metastasis: 1	total RNA	RNA was extracted with mirVana kit (Ambion), followed by clean-up and DNase I treatment with QIAGEN RNeasy mini kit in accordance with the prescribed protocol provided with the kit.	biotin	Biotinylated cRNA were prepared with the Ambion MessageAmp kit for Illumina arrays	9606	Standard Illumina hybridization protocol	Standard Illumina scanning protocol	The data were normalised using quantile normalisation with background subtraction.	GPL6883	Li,,Zhang	mlizhang@gmail.com	Quantitative Health Sciences	CleveLAND CLINIC LERNER COL/MED-CWRU	9500 Euclid Ave, JJN3	Cleveland	OH	44124	USA	NONE	24526	NA	primary uveal melanoma cells	1	F	1	1157
GSM1082587	RNA from primary UM 25	GSM1082587	Public on Feb 14 2013	Feb 13 2013	Feb 14 2013	RNA	1	primary uveal melanoma cells	Homo sapiens	cell type: primary uveal melanoma cells	gender: M	survival (days): 562	death with metastasis: 1	metastasis: 1	total RNA	RNA was extracted with mirVana kit (Ambion), followed by clean-up and DNase I treatment with QIAGEN RNeasy mini kit in accordance with the prescribed protocol provided with the kit.	biotin	Biotinylated cRNA were prepared with the Ambion MessageAmp kit for Illumina arrays	9606	Standard Illumina hybridization protocol	Standard Illumina scanning protocol	The data were normalised using quantile normalisation with background subtraction.	GPL6883	Li,,Zhang	mlizhang@gmail.com	Quantitative Health Sciences	CleveLAND CLINIC LERNER COL/MED-CWRU	9500 Euclid Ave, JJN3	Cleveland	OH	44124	USA	NONE	24526	NA	primary uveal melanoma cells	1	M	1	562
GSM1082588	RNA from primary UM 26	GSM1082588	Public on Feb 14 2013	Feb 13 2013	Feb 14 2013	RNA	1	primary uveal melanoma cells	Homo sapiens	cell type: primary uveal melanoma cells	gender: M	survival (days): 2041	death with metastasis: 0	metastasis: 0	total RNA	RNA was extracted with mirVana kit (Ambion), followed by clean-up and DNase I treatment with QIAGEN RNeasy mini kit in accordance with the prescribed protocol provided with the kit.	biotin	Biotinylated cRNA were prepared with the Ambion MessageAmp kit for Illumina arrays	9606	Standard Illumina hybridization protocol	Standard Illumina scanning protocol	The data were normalised using quantile normalisation with background subtraction.	GPL6883	Li,,Zhang	mlizhang@gmail.com	Quantitative Health Sciences	CleveLAND CLINIC LERNER COL/MED-CWRU	9500 Euclid Ave, JJN3	Cleveland	OH	44124	USA	NONE	24526	NA	primary uveal melanoma cells	0	M	0	2041
GSM1082589	RNA from primary UM 27	GSM1082589	Public on Feb 14 2013	Feb 13 2013	Feb 14 2013	RNA	1	primary uveal melanoma cells	Homo sapiens	cell type: primary uveal melanoma cells	gender: M	survival (days): 822	death with metastasis: 1	metastasis: 1	total RNA	RNA was extracted with mirVana kit (Ambion), followed by clean-up and DNase I treatment with QIAGEN RNeasy mini kit in accordance with the prescribed protocol provided with the kit.	biotin	Biotinylated cRNA were prepared with the Ambion MessageAmp kit for Illumina arrays	9606	Standard Illumina hybridization protocol	Standard Illumina scanning protocol	The data were normalised using quantile normalisation with background subtraction.	GPL6883	Li,,Zhang	mlizhang@gmail.com	Quantitative Health Sciences	CleveLAND CLINIC LERNER COL/MED-CWRU	9500 Euclid Ave, JJN3	Cleveland	OH	44124	USA	NONE	24526	NA	primary uveal melanoma cells	1	M	1	822
GSM1082590	RNA from primary UM 28	GSM1082590	Public on Feb 14 2013	Feb 13 2013	Feb 14 2013	RNA	1	primary uveal melanoma cells	Homo sapiens	cell type: primary uveal melanoma cells	gender: F	survival (days): 1186	death with metastasis: 1	metastasis: 1	total RNA	RNA was extracted with mirVana kit (Ambion), followed by clean-up and DNase I treatment with QIAGEN RNeasy mini kit in accordance with the prescribed protocol provided with the kit.	biotin	Biotinylated cRNA were prepared with the Ambion MessageAmp kit for Illumina arrays	9606	Standard Illumina hybridization protocol	Standard Illumina scanning protocol	The data were normalised using quantile normalisation with background subtraction.	GPL6883	Li,,Zhang	mlizhang@gmail.com	Quantitative Health Sciences	CleveLAND CLINIC LERNER COL/MED-CWRU	9500 Euclid Ave, JJN3	Cleveland	OH	44124	USA	NONE	24526	NA	primary uveal melanoma cells	1	F	1	1186
GSM1082591	RNA from primary UM 29	GSM1082591	Public on Feb 14 2013	Feb 13 2013	Feb 14 2013	RNA	1	primary uveal melanoma cells	Homo sapiens	cell type: primary uveal melanoma cells	gender: F	survival (days): 1614	death with metastasis: 0	metastasis: 0	total RNA	RNA was extracted with mirVana kit (Ambion), followed by clean-up and DNase I treatment with QIAGEN RNeasy mini kit in accordance with the prescribed protocol provided with the kit.	biotin	Biotinylated cRNA were prepared with the Ambion MessageAmp kit for Illumina arrays	9606	Standard Illumina hybridization protocol	Standard Illumina scanning protocol	The data were normalised using quantile normalisation with background subtraction.	GPL6883	Li,,Zhang	mlizhang@gmail.com	Quantitative Health Sciences	CleveLAND CLINIC LERNER COL/MED-CWRU	9500 Euclid Ave, JJN3	Cleveland	OH	44124	USA	NONE	24526	NA	primary uveal melanoma cells	0	F	0	1614
GSM1082592	RNA from primary UM 30	GSM1082592	Public on Feb 14 2013	Feb 13 2013	Feb 14 2013	RNA	1	primary uveal melanoma cells	Homo sapiens	cell type: primary uveal melanoma cells	gender: F	survival (days): 1491	death with metastasis: 0	metastasis: 0	total RNA	RNA was extracted with mirVana kit (Ambion), followed by clean-up and DNase I treatment with QIAGEN RNeasy mini kit in accordance with the prescribed protocol provided with the kit.	biotin	Biotinylated cRNA were prepared with the Ambion MessageAmp kit for Illumina arrays	9606	Standard Illumina hybridization protocol	Standard Illumina scanning protocol	The data were normalised using quantile normalisation with background subtraction.	GPL6883	Li,,Zhang	mlizhang@gmail.com	Quantitative Health Sciences	CleveLAND CLINIC LERNER COL/MED-CWRU	9500 Euclid Ave, JJN3	Cleveland	OH	44124	USA	NONE	24526	NA	primary uveal melanoma cells	0	F	0	1491
GSM1082593	RNA from primary UM 31	GSM1082593	Public on Feb 14 2013	Feb 13 2013	Feb 14 2013	RNA	1	primary uveal melanoma cells	Homo sapiens	cell type: primary uveal melanoma cells	gender: F	survival (days): 791	death with metastasis: 1	metastasis: 1	total RNA	RNA was extracted with mirVana kit (Ambion), followed by clean-up and DNase I treatment with QIAGEN RNeasy mini kit in accordance with the prescribed protocol provided with the kit.	biotin	Biotinylated cRNA were prepared with the Ambion MessageAmp kit for Illumina arrays	9606	Standard Illumina hybridization protocol	Standard Illumina scanning protocol	The data were normalised using quantile normalisation with background subtraction.	GPL6883	Li,,Zhang	mlizhang@gmail.com	Quantitative Health Sciences	CleveLAND CLINIC LERNER COL/MED-CWRU	9500 Euclid Ave, JJN3	Cleveland	OH	44124	USA	NONE	24526	NA	primary uveal melanoma cells	1	F	1	791
GSM1082594	RNA from primary UM 32	GSM1082594	Public on Feb 14 2013	Feb 13 2013	Feb 14 2013	RNA	1	primary uveal melanoma cells	Homo sapiens	cell type: primary uveal melanoma cells	gender: F	survival (days): 2284	death with metastasis: 0	metastasis: 0	total RNA	RNA was extracted with mirVana kit (Ambion), followed by clean-up and DNase I treatment with QIAGEN RNeasy mini kit in accordance with the prescribed protocol provided with the kit.	biotin	Biotinylated cRNA were prepared with the Ambion MessageAmp kit for Illumina arrays	9606	Standard Illumina hybridization protocol	Standard Illumina scanning protocol	The data were normalised using quantile normalisation with background subtraction.	GPL6883	Li,,Zhang	mlizhang@gmail.com	Quantitative Health Sciences	CleveLAND CLINIC LERNER COL/MED-CWRU	9500 Euclid Ave, JJN3	Cleveland	OH	44124	USA	NONE	24526	NA	primary uveal melanoma cells	0	F	0	2284
GSM1082595	RNA from primary UM 33	GSM1082595	Public on Feb 14 2013	Feb 13 2013	Feb 14 2013	RNA	1	primary uveal melanoma cells	Homo sapiens	cell type: primary uveal melanoma cells	gender: M	survival (days): 2952	death with metastasis: 0	metastasis: 0	total RNA	RNA was extracted with mirVana kit (Ambion), followed by clean-up and DNase I treatment with QIAGEN RNeasy mini kit in accordance with the prescribed protocol provided with the kit.	biotin	Biotinylated cRNA were prepared with the Ambion MessageAmp kit for Illumina arrays	9606	Standard Illumina hybridization protocol	Standard Illumina scanning protocol	The data were normalised using quantile normalisation with background subtraction.	GPL6883	Li,,Zhang	mlizhang@gmail.com	Quantitative Health Sciences	CleveLAND CLINIC LERNER COL/MED-CWRU	9500 Euclid Ave, JJN3	Cleveland	OH	44124	USA	NONE	24526	NA	primary uveal melanoma cells	0	M	0	2952
GSM1082596	RNA from primary UM 34	GSM1082596	Public on Feb 14 2013	Feb 13 2013	Feb 14 2013	RNA	1	primary uveal melanoma cells	Homo sapiens	cell type: primary uveal melanoma cells	gender: M	survival (days): 365	death with metastasis: 1	metastasis: 1	total RNA	RNA was extracted with mirVana kit (Ambion), followed by clean-up and DNase I treatment with QIAGEN RNeasy mini kit in accordance with the prescribed protocol provided with the kit.	biotin	Biotinylated cRNA were prepared with the Ambion MessageAmp kit for Illumina arrays	9606	Standard Illumina hybridization protocol	Standard Illumina scanning protocol	The data were normalised using quantile normalisation with background subtraction.	GPL6883	Li,,Zhang	mlizhang@gmail.com	Quantitative Health Sciences	CleveLAND CLINIC LERNER COL/MED-CWRU	9500 Euclid Ave, JJN3	Cleveland	OH	44124	USA	NONE	24526	NA	primary uveal melanoma cells	1	M	1	365
GSM1082597	RNA from NUM 35	GSM1082597	Public on Feb 14 2013	Feb 13 2013	Feb 14 2013	RNA	1	Normal Uveal Melanocytes	Homo sapiens	cell type: Normal Uveal Melanocytes	gender: unknown	survival (days): unknown	death with metastasis: .	metastasis: unknown	total RNA	RNA was extracted with mirVana kit (Ambion), followed by clean-up and DNase I treatment with QIAGEN RNeasy mini kit in accordance with the prescribed protocol provided with the kit.	biotin	Biotinylated cRNA were prepared with the Ambion MessageAmp kit for Illumina arrays	9606	Standard Illumina hybridization protocol	Standard Illumina scanning protocol	The data were normalised using quantile normalisation with background subtraction.	GPL6883	Li,,Zhang	mlizhang@gmail.com	Quantitative Health Sciences	CleveLAND CLINIC LERNER COL/MED-CWRU	9500 Euclid Ave, JJN3	Cleveland	OH	44124	USA	NONE	24526	NA	Normal Uveal Melanocytes	.	unknown	unknown	unknown
GSM1082598	RNA from primary UM 36	GSM1082598	Public on Feb 14 2013	Feb 13 2013	Feb 14 2013	RNA	1	primary uveal melanoma cells	Homo sapiens	cell type: primary uveal melanoma cells	gender: M	survival (days): 426	death with metastasis: 1	metastasis: 1	total RNA	RNA was extracted with mirVana kit (Ambion), followed by clean-up and DNase I treatment with QIAGEN RNeasy mini kit in accordance with the prescribed protocol provided with the kit.	biotin	Biotinylated cRNA were prepared with the Ambion MessageAmp kit for Illumina arrays	9606	Standard Illumina hybridization protocol	Standard Illumina scanning protocol	The data were normalised using quantile normalisation with background subtraction.	GPL6883	Li,,Zhang	mlizhang@gmail.com	Quantitative Health Sciences	CleveLAND CLINIC LERNER COL/MED-CWRU	9500 Euclid Ave, JJN3	Cleveland	OH	44124	USA	NONE	24526	NA	primary uveal melanoma cells	1	M	1	426
GSM1082599	RNA from primary UM 37	GSM1082599	Public on Feb 14 2013	Feb 13 2013	Feb 14 2013	RNA	1	primary uveal melanoma cells	Homo sapiens	cell type: primary uveal melanoma cells	gender: M	survival (days): 943	death with metastasis: 1	metastasis: 1	total RNA	RNA was extracted with mirVana kit (Ambion), followed by clean-up and DNase I treatment with QIAGEN RNeasy mini kit in accordance with the prescribed protocol provided with the kit.	biotin	Biotinylated cRNA were prepared with the Ambion MessageAmp kit for Illumina arrays	9606	Standard Illumina hybridization protocol	Standard Illumina scanning protocol	The data were normalised using quantile normalisation with background subtraction.	GPL6883	Li,,Zhang	mlizhang@gmail.com	Quantitative Health Sciences	CleveLAND CLINIC LERNER COL/MED-CWRU	9500 Euclid Ave, JJN3	Cleveland	OH	44124	USA	NONE	24526	NA	primary uveal melanoma cells	1	M	1	943
GSM1082600	RNA from primary UM 38	GSM1082600	Public on Feb 14 2013	Feb 13 2013	Feb 14 2013	RNA	1	primary uveal melanoma cells	Homo sapiens	cell type: primary uveal melanoma cells	gender: M	survival (days): 3105	death with metastasis: 0	metastasis: 0	total RNA	RNA was extracted with mirVana kit (Ambion), followed by clean-up and DNase I treatment with QIAGEN RNeasy mini kit in accordance with the prescribed protocol provided with the kit.	biotin	Biotinylated cRNA were prepared with the Ambion MessageAmp kit for Illumina arrays	9606	Standard Illumina hybridization protocol	Standard Illumina scanning protocol	The data were normalised using quantile normalisation with background subtraction.	GPL6883	Li,,Zhang	mlizhang@gmail.com	Quantitative Health Sciences	CleveLAND CLINIC LERNER COL/MED-CWRU	9500 Euclid Ave, JJN3	Cleveland	OH	44124	USA	NONE	24526	NA	primary uveal melanoma cells	0	M	0	3105
GSM1082601	RNA from primary UM 39	GSM1082601	Public on Feb 14 2013	Feb 13 2013	Feb 14 2013	RNA	1	primary uveal melanoma cells	Homo sapiens	cell type: primary uveal melanoma cells	gender: F	survival (days): 2782	death with metastasis: 0	metastasis: 0	total RNA	RNA was extracted with mirVana kit (Ambion), followed by clean-up and DNase I treatment with QIAGEN RNeasy mini kit in accordance with the prescribed protocol provided with the kit.	biotin	Biotinylated cRNA were prepared with the Ambion MessageAmp kit for Illumina arrays	9606	Standard Illumina hybridization protocol	Standard Illumina scanning protocol	The data were normalised using quantile normalisation with background subtraction.	GPL6883	Li,,Zhang	mlizhang@gmail.com	Quantitative Health Sciences	CleveLAND CLINIC LERNER COL/MED-CWRU	9500 Euclid Ave, JJN3	Cleveland	OH	44124	USA	NONE	24526	NA	primary uveal melanoma cells	0	F	0	2782
GSM1082602	RNA from primary UM 40	GSM1082602	Public on Feb 14 2013	Feb 13 2013	Feb 14 2013	RNA	1	primary uveal melanoma cells	Homo sapiens	cell type: primary uveal melanoma cells	gender: M	survival (days): 1003	death with metastasis: 1	metastasis: 1	total RNA	RNA was extracted with mirVana kit (Ambion), followed by clean-up and DNase I treatment with QIAGEN RNeasy mini kit in accordance with the prescribed protocol provided with the kit.	biotin	Biotinylated cRNA were prepared with the Ambion MessageAmp kit for Illumina arrays	9606	Standard Illumina hybridization protocol	Standard Illumina scanning protocol	The data were normalised using quantile normalisation with background subtraction.	GPL6883	Li,,Zhang	mlizhang@gmail.com	Quantitative Health Sciences	CleveLAND CLINIC LERNER COL/MED-CWRU	9500 Euclid Ave, JJN3	Cleveland	OH	44124	USA	NONE	24526	NA	primary uveal melanoma cells	1	M	1	1003
GSM1082603	RNA from primary UM 41	GSM1082603	Public on Feb 14 2013	Feb 13 2013	Feb 14 2013	RNA	1	primary uveal melanoma cells	Homo sapiens	cell type: primary uveal melanoma cells	gender: F	survival (days): 342	death with metastasis: 1	metastasis: 1	total RNA	RNA was extracted with mirVana kit (Ambion), followed by clean-up and DNase I treatment with QIAGEN RNeasy mini kit in accordance with the prescribed protocol provided with the kit.	biotin	Biotinylated cRNA were prepared with the Ambion MessageAmp kit for Illumina arrays	9606	Standard Illumina hybridization protocol	Standard Illumina scanning protocol	The data were normalised using quantile normalisation with background subtraction.	GPL6883	Li,,Zhang	mlizhang@gmail.com	Quantitative Health Sciences	CleveLAND CLINIC LERNER COL/MED-CWRU	9500 Euclid Ave, JJN3	Cleveland	OH	44124	USA	NONE	24526	NA	primary uveal melanoma cells	1	F	1	342
GSM1082604	RNA from primary UM 42	GSM1082604	Public on Feb 14 2013	Feb 13 2013	Feb 14 2013	RNA	1	primary uveal melanoma cells	Homo sapiens	cell type: primary uveal melanoma cells	gender: M	survival (days): 1413	death with metastasis: 0	metastasis: 0	total RNA	RNA was extracted with mirVana kit (Ambion), followed by clean-up and DNase I treatment with QIAGEN RNeasy mini kit in accordance with the prescribed protocol provided with the kit.	biotin	Biotinylated cRNA were prepared with the Ambion MessageAmp kit for Illumina arrays	9606	Standard Illumina hybridization protocol	Standard Illumina scanning protocol	The data were normalised using quantile normalisation with background subtraction.	GPL6883	Li,,Zhang	mlizhang@gmail.com	Quantitative Health Sciences	CleveLAND CLINIC LERNER COL/MED-CWRU	9500 Euclid Ave, JJN3	Cleveland	OH	44124	USA	NONE	24526	NA	primary uveal melanoma cells	0	M	0	1413
GSM1082605	RNA from primary UM 43	GSM1082605	Public on Feb 14 2013	Feb 13 2013	Feb 14 2013	RNA	1	primary uveal melanoma cells	Homo sapiens	cell type: primary uveal melanoma cells	gender: F	survival (days): 2100	death with metastasis: 0	metastasis: 0	total RNA	RNA was extracted with mirVana kit (Ambion), followed by clean-up and DNase I treatment with QIAGEN RNeasy mini kit in accordance with the prescribed protocol provided with the kit.	biotin	Biotinylated cRNA were prepared with the Ambion MessageAmp kit for Illumina arrays	9606	Standard Illumina hybridization protocol	Standard Illumina scanning protocol	The data were normalised using quantile normalisation with background subtraction.	GPL6883	Li,,Zhang	mlizhang@gmail.com	Quantitative Health Sciences	CleveLAND CLINIC LERNER COL/MED-CWRU	9500 Euclid Ave, JJN3	Cleveland	OH	44124	USA	NONE	24526	NA	primary uveal melanoma cells	0	F	0	2100
GSM1082606	RNA from primary UM 44	GSM1082606	Public on Feb 14 2013	Feb 13 2013	Feb 14 2013	RNA	1	primary uveal melanoma cells	Homo sapiens	cell type: primary uveal melanoma cells	gender: M	survival (days): 1192	death with metastasis: 1	metastasis: 1	total RNA	RNA was extracted with mirVana kit (Ambion), followed by clean-up and DNase I treatment with QIAGEN RNeasy mini kit in accordance with the prescribed protocol provided with the kit.	biotin	Biotinylated cRNA were prepared with the Ambion MessageAmp kit for Illumina arrays	9606	Standard Illumina hybridization protocol	Standard Illumina scanning protocol	The data were normalised using quantile normalisation with background subtraction.	GPL6883	Li,,Zhang	mlizhang@gmail.com	Quantitative Health Sciences	CleveLAND CLINIC LERNER COL/MED-CWRU	9500 Euclid Ave, JJN3	Cleveland	OH	44124	USA	NONE	24526	NA	primary uveal melanoma cells	1	M	1	1192
GSM1082607	RNA from primary UM 45	GSM1082607	Public on Feb 14 2013	Feb 13 2013	Feb 14 2013	RNA	1	primary uveal melanoma cells	Homo sapiens	cell type: primary uveal melanoma cells	gender: M	survival (days): 1157	death with metastasis: 1	metastasis: 1	total RNA	RNA was extracted with mirVana kit (Ambion), followed by clean-up and DNase I treatment with QIAGEN RNeasy mini kit in accordance with the prescribed protocol provided with the kit.	biotin	Biotinylated cRNA were prepared with the Ambion MessageAmp kit for Illumina arrays	9606	Standard Illumina hybridization protocol	Standard Illumina scanning protocol	The data were normalised using quantile normalisation with background subtraction.	GPL6883	Li,,Zhang	mlizhang@gmail.com	Quantitative Health Sciences	CleveLAND CLINIC LERNER COL/MED-CWRU	9500 Euclid Ave, JJN3	Cleveland	OH	44124	USA	NONE	24526	NA	primary uveal melanoma cells	1	M	1	1157
GSM1082608	RNA from primary UM 46	GSM1082608	Public on Feb 14 2013	Feb 13 2013	Feb 14 2013	RNA	1	primary uveal melanoma cells	Homo sapiens	cell type: primary uveal melanoma cells	gender: M	survival (days): 1338	death with metastasis: 0	metastasis: 0	total RNA	RNA was extracted with mirVana kit (Ambion), followed by clean-up and DNase I treatment with QIAGEN RNeasy mini kit in accordance with the prescribed protocol provided with the kit.	biotin	Biotinylated cRNA were prepared with the Ambion MessageAmp kit for Illumina arrays	9606	Standard Illumina hybridization protocol	Standard Illumina scanning protocol	The data were normalised using quantile normalisation with background subtraction.	GPL6883	Li,,Zhang	mlizhang@gmail.com	Quantitative Health Sciences	CleveLAND CLINIC LERNER COL/MED-CWRU	9500 Euclid Ave, JJN3	Cleveland	OH	44124	USA	NONE	24526	NA	primary uveal melanoma cells	0	M	0	1338
GSM1082609	RNA from primary UM 47	GSM1082609	Public on Feb 14 2013	Feb 13 2013	Feb 14 2013	RNA	1	primary uveal melanoma cells	Homo sapiens	cell type: primary uveal melanoma cells	gender: M	survival (days): 1338	death with metastasis: 0	metastasis: 0	total RNA	RNA was extracted with mirVana kit (Ambion), followed by clean-up and DNase I treatment with QIAGEN RNeasy mini kit in accordance with the prescribed protocol provided with the kit.	biotin	Biotinylated cRNA were prepared with the Ambion MessageAmp kit for Illumina arrays	9606	Standard Illumina hybridization protocol	Standard Illumina scanning protocol	The data were normalised using quantile normalisation with background subtraction.	GPL6883	Li,,Zhang	mlizhang@gmail.com	Quantitative Health Sciences	CleveLAND CLINIC LERNER COL/MED-CWRU	9500 Euclid Ave, JJN3	Cleveland	OH	44124	USA	NONE	24526	NA	primary uveal melanoma cells	0	M	0	1338
GSM1082610	RNA from primary UM 48	GSM1082610	Public on Feb 14 2013	Feb 13 2013	Feb 14 2013	RNA	1	primary uveal melanoma cells	Homo sapiens	cell type: primary uveal melanoma cells	gender: F	survival (days): 995	death with metastasis: 1	metastasis: 1	total RNA	RNA was extracted with mirVana kit (Ambion), followed by clean-up and DNase I treatment with QIAGEN RNeasy mini kit in accordance with the prescribed protocol provided with the kit.	biotin	Biotinylated cRNA were prepared with the Ambion MessageAmp kit for Illumina arrays	9606	Standard Illumina hybridization protocol	Standard Illumina scanning protocol	The data were normalised using quantile normalisation with background subtraction.	GPL6883	Li,,Zhang	mlizhang@gmail.com	Quantitative Health Sciences	CleveLAND CLINIC LERNER COL/MED-CWRU	9500 Euclid Ave, JJN3	Cleveland	OH	44124	USA	NONE	24526	NA	primary uveal melanoma cells	1	F	1	995
GSM1082611	RNA from primary UM 50	GSM1082611	Public on Feb 14 2013	Feb 13 2013	Feb 14 2013	RNA	1	primary uveal melanoma cells	Homo sapiens	cell type: primary uveal melanoma cells	gender: M	survival (days): 699	death with metastasis: 0	metastasis: 0	total RNA	RNA was extracted with mirVana kit (Ambion), followed by clean-up and DNase I treatment with QIAGEN RNeasy mini kit in accordance with the prescribed protocol provided with the kit.	biotin	Biotinylated cRNA were prepared with the Ambion MessageAmp kit for Illumina arrays	9606	Standard Illumina hybridization protocol	Standard Illumina scanning protocol	The data were normalised using quantile normalisation with background subtraction.	GPL6883	Li,,Zhang	mlizhang@gmail.com	Quantitative Health Sciences	CleveLAND CLINIC LERNER COL/MED-CWRU	9500 Euclid Ave, JJN3	Cleveland	OH	44124	USA	NONE	24526	NA	primary uveal melanoma cells	0	M	0	699
GSM1082612	RNA from primary UM 51	GSM1082612	Public on Feb 14 2013	Feb 13 2013	Feb 14 2013	RNA	1	primary uveal melanoma cells	Homo sapiens	cell type: primary uveal melanoma cells	gender: F	survival (days): 1310	death with metastasis: 0	metastasis: 0	total RNA	RNA was extracted with mirVana kit (Ambion), followed by clean-up and DNase I treatment with QIAGEN RNeasy mini kit in accordance with the prescribed protocol provided with the kit.	biotin	Biotinylated cRNA were prepared with the Ambion MessageAmp kit for Illumina arrays	9606	Standard Illumina hybridization protocol	Standard Illumina scanning protocol	The data were normalised using quantile normalisation with background subtraction.	GPL6883	Li,,Zhang	mlizhang@gmail.com	Quantitative Health Sciences	CleveLAND CLINIC LERNER COL/MED-CWRU	9500 Euclid Ave, JJN3	Cleveland	OH	44124	USA	NONE	24526	NA	primary uveal melanoma cells	0	F	0	1310
GSM1082613	RNA from primary UM 52	GSM1082613	Public on Feb 14 2013	Feb 13 2013	Feb 14 2013	RNA	1	primary uveal melanoma cells	Homo sapiens	cell type: primary uveal melanoma cells	gender: F	survival (days): 820	death with metastasis: 0	metastasis: 0	total RNA	RNA was extracted with mirVana kit (Ambion), followed by clean-up and DNase I treatment with QIAGEN RNeasy mini kit in accordance with the prescribed protocol provided with the kit.	biotin	Biotinylated cRNA were prepared with the Ambion MessageAmp kit for Illumina arrays	9606	Standard Illumina hybridization protocol	Standard Illumina scanning protocol	The data were normalised using quantile normalisation with background subtraction.	GPL6883	Li,,Zhang	mlizhang@gmail.com	Quantitative Health Sciences	CleveLAND CLINIC LERNER COL/MED-CWRU	9500 Euclid Ave, JJN3	Cleveland	OH	44124	USA	NONE	24526	NA	primary uveal melanoma cells	0	F	0	820
GSM1082614	RNA from primary UM 53	GSM1082614	Public on Feb 14 2013	Feb 13 2013	Feb 14 2013	RNA	1	primary uveal melanoma cells	Homo sapiens	cell type: primary uveal melanoma cells	gender: M	survival (days): 1553	death with metastasis: 0	metastasis: 0	total RNA	RNA was extracted with mirVana kit (Ambion), followed by clean-up and DNase I treatment with QIAGEN RNeasy mini kit in accordance with the prescribed protocol provided with the kit.	biotin	Biotinylated cRNA were prepared with the Ambion MessageAmp kit for Illumina arrays	9606	Standard Illumina hybridization protocol	Standard Illumina scanning protocol	The data were normalised using quantile normalisation with background subtraction.	GPL6883	Li,,Zhang	mlizhang@gmail.com	Quantitative Health Sciences	CleveLAND CLINIC LERNER COL/MED-CWRU	9500 Euclid Ave, JJN3	Cleveland	OH	44124	USA	NONE	24526	NA	primary uveal melanoma cells	0	M	0	1553
GSM1082615	RNA from primary UM 54	GSM1082615	Public on Feb 14 2013	Feb 13 2013	Feb 14 2013	RNA	1	primary uveal melanoma cells	Homo sapiens	cell type: primary uveal melanoma cells	gender: F	survival (days): 822	death with metastasis: 1	metastasis: 1	total RNA	RNA was extracted with mirVana kit (Ambion), followed by clean-up and DNase I treatment with QIAGEN RNeasy mini kit in accordance with the prescribed protocol provided with the kit.	biotin	Biotinylated cRNA were prepared with the Ambion MessageAmp kit for Illumina arrays	9606	Standard Illumina hybridization protocol	Standard Illumina scanning protocol	The data were normalised using quantile normalisation with background subtraction.	GPL6883	Li,,Zhang	mlizhang@gmail.com	Quantitative Health Sciences	CleveLAND CLINIC LERNER COL/MED-CWRU	9500 Euclid Ave, JJN3	Cleveland	OH	44124	USA	NONE	24526	NA	primary uveal melanoma cells	1	F	1	822
GSM1082616	RNA from primary UM 55	GSM1082616	Public on Feb 14 2013	Feb 13 2013	Feb 14 2013	RNA	1	primary uveal melanoma cells	Homo sapiens	cell type: primary uveal melanoma cells	gender: F	survival (days): 1249	death with metastasis: 0	metastasis: 0	total RNA	RNA was extracted with mirVana kit (Ambion), followed by clean-up and DNase I treatment with QIAGEN RNeasy mini kit in accordance with the prescribed protocol provided with the kit.	biotin	Biotinylated cRNA were prepared with the Ambion MessageAmp kit for Illumina arrays	9606	Standard Illumina hybridization protocol	Standard Illumina scanning protocol	The data were normalised using quantile normalisation with background subtraction.	GPL6883	Li,,Zhang	mlizhang@gmail.com	Quantitative Health Sciences	CleveLAND CLINIC LERNER COL/MED-CWRU	9500 Euclid Ave, JJN3	Cleveland	OH	44124	USA	NONE	24526	NA	primary uveal melanoma cells	0	F	0	1249
GSM1082617	RNA from primary UM 56	GSM1082617	Public on Feb 14 2013	Feb 13 2013	Feb 14 2013	RNA	1	primary uveal melanoma cells	Homo sapiens	cell type: primary uveal melanoma cells	gender: M	survival (days): 1218	death with metastasis: 0	metastasis: 0	total RNA	RNA was extracted with mirVana kit (Ambion), followed by clean-up and DNase I treatment with QIAGEN RNeasy mini kit in accordance with the prescribed protocol provided with the kit.	biotin	Biotinylated cRNA were prepared with the Ambion MessageAmp kit for Illumina arrays	9606	Standard Illumina hybridization protocol	Standard Illumina scanning protocol	The data were normalised using quantile normalisation with background subtraction.	GPL6883	Li,,Zhang	mlizhang@gmail.com	Quantitative Health Sciences	CleveLAND CLINIC LERNER COL/MED-CWRU	9500 Euclid Ave, JJN3	Cleveland	OH	44124	USA	NONE	24526	NA	primary uveal melanoma cells	0	M	0	1218
GSM1082618	RNA from primary UM 57	GSM1082618	Public on Feb 14 2013	Feb 13 2013	Feb 14 2013	RNA	1	primary uveal melanoma cells	Homo sapiens	cell type: primary uveal melanoma cells	gender: F	survival (days): 1188	death with metastasis: 0	metastasis: 0	total RNA	RNA was extracted with mirVana kit (Ambion), followed by clean-up and DNase I treatment with QIAGEN RNeasy mini kit in accordance with the prescribed protocol provided with the kit.	biotin	Biotinylated cRNA were prepared with the Ambion MessageAmp kit for Illumina arrays	9606	Standard Illumina hybridization protocol	Standard Illumina scanning protocol	The data were normalised using quantile normalisation with background subtraction.	GPL6883	Li,,Zhang	mlizhang@gmail.com	Quantitative Health Sciences	CleveLAND CLINIC LERNER COL/MED-CWRU	9500 Euclid Ave, JJN3	Cleveland	OH	44124	USA	NONE	24526	NA	primary uveal melanoma cells	0	F	0	1188
GSM1082619	RNA from primary UM 58	GSM1082619	Public on Feb 14 2013	Feb 13 2013	Feb 14 2013	RNA	1	primary uveal melanoma cells	Homo sapiens	cell type: primary uveal melanoma cells	gender: F	survival (days): 1218	death with metastasis: 0	metastasis: 0	total RNA	RNA was extracted with mirVana kit (Ambion), followed by clean-up and DNase I treatment with QIAGEN RNeasy mini kit in accordance with the prescribed protocol provided with the kit.	biotin	Biotinylated cRNA were prepared with the Ambion MessageAmp kit for Illumina arrays	9606	Standard Illumina hybridization protocol	Standard Illumina scanning protocol	The data were normalised using quantile normalisation with background subtraction.	GPL6883	Li,,Zhang	mlizhang@gmail.com	Quantitative Health Sciences	CleveLAND CLINIC LERNER COL/MED-CWRU	9500 Euclid Ave, JJN3	Cleveland	OH	44124	USA	NONE	24526	NA	primary uveal melanoma cells	0	F	0	1218
GSM1082620	RNA from primary UM 59	GSM1082620	Public on Feb 14 2013	Feb 13 2013	Feb 14 2013	RNA	1	primary uveal melanoma cells	Homo sapiens	cell type: primary uveal melanoma cells	gender: M	survival (days): 1218	death with metastasis: 0	metastasis: 0	total RNA	RNA was extracted with mirVana kit (Ambion), followed by clean-up and DNase I treatment with QIAGEN RNeasy mini kit in accordance with the prescribed protocol provided with the kit.	biotin	Biotinylated cRNA were prepared with the Ambion MessageAmp kit for Illumina arrays	9606	Standard Illumina hybridization protocol	Standard Illumina scanning protocol	The data were normalised using quantile normalisation with background subtraction.	GPL6883	Li,,Zhang	mlizhang@gmail.com	Quantitative Health Sciences	CleveLAND CLINIC LERNER COL/MED-CWRU	9500 Euclid Ave, JJN3	Cleveland	OH	44124	USA	NONE	24526	NA	primary uveal melanoma cells	0	M	0	1218
GSM1082621	RNA from primary UM 60	GSM1082621	Public on Feb 14 2013	Feb 13 2013	Feb 14 2013	RNA	1	primary uveal melanoma cells	Homo sapiens	cell type: primary uveal melanoma cells	gender: M	survival (days): 488	death with metastasis: 1	metastasis: 1	total RNA	RNA was extracted with mirVana kit (Ambion), followed by clean-up and DNase I treatment with QIAGEN RNeasy mini kit in accordance with the prescribed protocol provided with the kit.	biotin	Biotinylated cRNA were prepared with the Ambion MessageAmp kit for Illumina arrays	9606	Standard Illumina hybridization protocol	Standard Illumina scanning protocol	The data were normalised using quantile normalisation with background subtraction.	GPL6883	Li,,Zhang	mlizhang@gmail.com	Quantitative Health Sciences	CleveLAND CLINIC LERNER COL/MED-CWRU	9500 Euclid Ave, JJN3	Cleveland	OH	44124	USA	NONE	24526	NA	primary uveal melanoma cells	1	M	1	488
GSM1082622	RNA from primary UM 61	GSM1082622	Public on Feb 14 2013	Feb 13 2013	Feb 14 2013	RNA	1	primary uveal melanoma cells	Homo sapiens	cell type: primary uveal melanoma cells	gender: M	survival (days): 1126	death with metastasis: 0	metastasis: 0	total RNA	RNA was extracted with mirVana kit (Ambion), followed by clean-up and DNase I treatment with QIAGEN RNeasy mini kit in accordance with the prescribed protocol provided with the kit.	biotin	Biotinylated cRNA were prepared with the Ambion MessageAmp kit for Illumina arrays	9606	Standard Illumina hybridization protocol	Standard Illumina scanning protocol	The data were normalised using quantile normalisation with background subtraction.	GPL6883	Li,,Zhang	mlizhang@gmail.com	Quantitative Health Sciences	CleveLAND CLINIC LERNER COL/MED-CWRU	9500 Euclid Ave, JJN3	Cleveland	OH	44124	USA	NONE	24526	NA	primary uveal melanoma cells	0	M	0	1126
GSM1082623	RNA from primary UM 62	GSM1082623	Public on Feb 14 2013	Feb 13 2013	Feb 14 2013	RNA	1	primary uveal melanoma cells	Homo sapiens	cell type: primary uveal melanoma cells	gender: F	survival (days): 1035	death with metastasis: 0	metastasis: 0	total RNA	RNA was extracted with mirVana kit (Ambion), followed by clean-up and DNase I treatment with QIAGEN RNeasy mini kit in accordance with the prescribed protocol provided with the kit.	biotin	Biotinylated cRNA were prepared with the Ambion MessageAmp kit for Illumina arrays	9606	Standard Illumina hybridization protocol	Standard Illumina scanning protocol	The data were normalised using quantile normalisation with background subtraction.	GPL6883	Li,,Zhang	mlizhang@gmail.com	Quantitative Health Sciences	CleveLAND CLINIC LERNER COL/MED-CWRU	9500 Euclid Ave, JJN3	Cleveland	OH	44124	USA	NONE	24526	NA	primary uveal melanoma cells	0	F	0	1035
GSM1082624	RNA from primary UM 63	GSM1082624	Public on Feb 14 2013	Feb 13 2013	Feb 14 2013	RNA	1	primary uveal melanoma cells	Homo sapiens	cell type: primary uveal melanoma cells	gender: M	survival (days): 668	death with metastasis: 1	metastasis: 1	total RNA	RNA was extracted with mirVana kit (Ambion), followed by clean-up and DNase I treatment with QIAGEN RNeasy mini kit in accordance with the prescribed protocol provided with the kit.	biotin	Biotinylated cRNA were prepared with the Ambion MessageAmp kit for Illumina arrays	9606	Standard Illumina hybridization protocol	Standard Illumina scanning protocol	The data were normalised using quantile normalisation with background subtraction.	GPL6883	Li,,Zhang	mlizhang@gmail.com	Quantitative Health Sciences	CleveLAND CLINIC LERNER COL/MED-CWRU	9500 Euclid Ave, JJN3	Cleveland	OH	44124	USA	NONE	24526	NA	primary uveal melanoma cells	1	M	1	668
GSM1082625	RNA from primary UM 64	GSM1082625	Public on Feb 14 2013	Feb 13 2013	Feb 14 2013	RNA	1	primary uveal melanoma cells	Homo sapiens	cell type: primary uveal melanoma cells	gender: F	survival (days): 945	death with metastasis: 0	metastasis: 0	total RNA	RNA was extracted with mirVana kit (Ambion), followed by clean-up and DNase I treatment with QIAGEN RNeasy mini kit in accordance with the prescribed protocol provided with the kit.	biotin	Biotinylated cRNA were prepared with the Ambion MessageAmp kit for Illumina arrays	9606	Standard Illumina hybridization protocol	Standard Illumina scanning protocol	The data were normalised using quantile normalisation with background subtraction.	GPL6883	Li,,Zhang	mlizhang@gmail.com	Quantitative Health Sciences	CleveLAND CLINIC LERNER COL/MED-CWRU	9500 Euclid Ave, JJN3	Cleveland	OH	44124	USA	NONE	24526	NA	primary uveal melanoma cells	0	F	0	945

## Sheet: S9
phenodata of GSE84976
ID	title	geo_accession	status	submission_date	last_update_date	type	channel_count	source_name_ch1	organism_ch1	characteristics_ch1	characteristics_ch1.1	characteristics_ch1.2	characteristics_ch1.3	characteristics_ch1.4	characteristics_ch1.5	characteristics_ch1.6	molecule_ch1	extract_protocol_ch1	label_ch1	label_protocol_ch1	taxid_ch1	hyb_protocol	scan_protocol	description	data_processing	platform_id	contact_name	contact_email	contact_institute	contact_address	contact_city	contact_zip/postal_code	contact_country	supplementary_file	data_row_count	age at enucleation (years):ch1	chromosome 3 status:ch1	death due to metastasis:ch1	follow-up (months):ch1	hc10 (hla-b/c)-positive (percentage):ch1	hca2 (hla-a)-positive (percentage):ch1	tal.1b5 (hla-dr)-positive (percentage):ch1
GSM2254877	UM_01	GSM2254877	Public on Aug 07 2016	Jul 29 2016	Aug 07 2016	RNA	1	tissue sample of uveal melanoma of enucleated eye	Homo sapiens	age at enucleation (years): 68	death due to metastasis: alive	chromosome 3 status: Disomy 3	follow-up (months): 141	hc10 (hla-b/c)-positive (percentage): 5	hca2 (hla-a)-positive (percentage): 0	tal.1b5 (hla-dr)-positive (percentage): 10	total RNA	RNA was extracted with Ambion RNAqueous isolation kit, followed by DNase I treatment and clean-up with QIAGEN RNeasy mini kit in accordance with the prescribed protocol provided with the kit. Quality control was performed with Agilent Bioanalyser	biotin	Biotinylated cRNA were prepared with the Ambion TotalPrep RNA Amp kit for Illumina arrays	9606	Standard Illumina hybridization protocol	Standard Illumina scanning protocol	101867-01	Background correction, normalization and transformation was performed with the 'rsn' function of the lumi package v2.12.0	GPL10558	Theodorus,Huibertus,van Essen	t.h.van_essen@lumc.nl	Leiden University Medical Center	Albinusdreef 2	Leiden	2333ZA	Netherlands	NONE	34625	68	Disomy 3	alive	141	5	0	10
GSM2254878	UM_02	GSM2254878	Public on Aug 07 2016	Jul 29 2016	Aug 07 2016	RNA	1	tissue sample of uveal melanoma of enucleated eye	Homo sapiens	age at enucleation (years): 72	death due to metastasis: death due to other cause	chromosome 3 status: Disomy 3	follow-up (months): 66	hc10 (hla-b/c)-positive (percentage): 25	hca2 (hla-a)-positive (percentage): 40	tal.1b5 (hla-dr)-positive (percentage): 60	total RNA	RNA was extracted with Ambion RNAqueous isolation kit, followed by DNase I treatment and clean-up with QIAGEN RNeasy mini kit in accordance with the prescribed protocol provided with the kit. Quality control was performed with Agilent Bioanalyser	biotin	Biotinylated cRNA were prepared with the Ambion TotalPrep RNA Amp kit for Illumina arrays	9606	Standard Illumina hybridization protocol	Standard Illumina scanning protocol	101867-02	Background correction, normalization and transformation was performed with the 'rsn' function of the lumi package v2.12.0	GPL10558	Theodorus,Huibertus,van Essen	t.h.van_essen@lumc.nl	Leiden University Medical Center	Albinusdreef 2	Leiden	2333ZA	Netherlands	NONE	34625	72	Disomy 3	death due to other cause	66	25	40	60
GSM2254879	UM_03	GSM2254879	Public on Aug 07 2016	Jul 29 2016	Aug 07 2016	RNA	1	tissue sample of uveal melanoma of enucleated eye	Homo sapiens	age at enucleation (years): 73	death due to metastasis: death due to metas	chromosome 3 status: Monosomy 3	follow-up (months): 16	hc10 (hla-b/c)-positive (percentage): 60	hca2 (hla-a)-positive (percentage): 50	tal.1b5 (hla-dr)-positive (percentage): 10	total RNA	RNA was extracted with Ambion RNAqueous isolation kit, followed by DNase I treatment and clean-up with QIAGEN RNeasy mini kit in accordance with the prescribed protocol provided with the kit. Quality control was performed with Agilent Bioanalyser	biotin	Biotinylated cRNA were prepared with the Ambion TotalPrep RNA Amp kit for Illumina arrays	9606	Standard Illumina hybridization protocol	Standard Illumina scanning protocol	101867-03	Background correction, normalization and transformation was performed with the 'rsn' function of the lumi package v2.12.0	GPL10558	Theodorus,Huibertus,van Essen	t.h.van_essen@lumc.nl	Leiden University Medical Center	Albinusdreef 2	Leiden	2333ZA	Netherlands	NONE	34625	73	Monosomy 3	death due to metas	16	60	50	10
GSM2254880	UM_04	GSM2254880	Public on Aug 07 2016	Jul 29 2016	Aug 07 2016	RNA	1	tissue sample of uveal melanoma of enucleated eye	Homo sapiens	age at enucleation (years): 44	death due to metastasis: death due to metas	chromosome 3 status: Monosomy 3	follow-up (months): 24	hc10 (hla-b/c)-positive (percentage): 60	hca2 (hla-a)-positive (percentage): 50	tal.1b5 (hla-dr)-positive (percentage): 20	total RNA	RNA was extracted with Ambion RNAqueous isolation kit, followed by DNase I treatment and clean-up with QIAGEN RNeasy mini kit in accordance with the prescribed protocol provided with the kit. Quality control was performed with Agilent Bioanalyser	biotin	Biotinylated cRNA were prepared with the Ambion TotalPrep RNA Amp kit for Illumina arrays	9606	Standard Illumina hybridization protocol	Standard Illumina scanning protocol	101867-05	Background correction, normalization and transformation was performed with the 'rsn' function of the lumi package v2.12.0	GPL10558	Theodorus,Huibertus,van Essen	t.h.van_essen@lumc.nl	Leiden University Medical Center	Albinusdreef 2	Leiden	2333ZA	Netherlands	NONE	34625	44	Monosomy 3	death due to metas	24	60	50	20
GSM2254881	UM_05	GSM2254881	Public on Aug 07 2016	Jul 29 2016	Aug 07 2016	RNA	1	tissue sample of uveal melanoma of enucleated eye	Homo sapiens	age at enucleation (years): 33	death due to metastasis: alive	chromosome 3 status: Disomy 3	follow-up (months): 120	hc10 (hla-b/c)-positive (percentage): 0	hca2 (hla-a)-positive (percentage): 0	tal.1b5 (hla-dr)-positive (percentage): 5	total RNA	RNA was extracted with Ambion RNAqueous isolation kit, followed by DNase I treatment and clean-up with QIAGEN RNeasy mini kit in accordance with the prescribed protocol provided with the kit. Quality control was performed with Agilent Bioanalyser	biotin	Biotinylated cRNA were prepared with the Ambion TotalPrep RNA Amp kit for Illumina arrays	9606	Standard Illumina hybridization protocol	Standard Illumina scanning protocol	101867-06	Background correction, normalization and transformation was performed with the 'rsn' function of the lumi package v2.12.0	GPL10558	Theodorus,Huibertus,van Essen	t.h.van_essen@lumc.nl	Leiden University Medical Center	Albinusdreef 2	Leiden	2333ZA	Netherlands	NONE	34625	33	Disomy 3	alive	120	0	0	5
GSM2254882	UM_06	GSM2254882	Public on Aug 07 2016	Jul 29 2016	Aug 07 2016	RNA	1	tissue sample of uveal melanoma of enucleated eye	Homo sapiens	age at enucleation (years): 50	death due to metastasis: death due to other cause	chromosome 3 status: Monosomy 3	follow-up (months): 126	hc10 (hla-b/c)-positive (percentage): 90	hca2 (hla-a)-positive (percentage): 70	tal.1b5 (hla-dr)-positive (percentage): 15	total RNA	RNA was extracted with Ambion RNAqueous isolation kit, followed by DNase I treatment and clean-up with QIAGEN RNeasy mini kit in accordance with the prescribed protocol provided with the kit. Quality control was performed with Agilent Bioanalyser	biotin	Biotinylated cRNA were prepared with the Ambion TotalPrep RNA Amp kit for Illumina arrays	9606	Standard Illumina hybridization protocol	Standard Illumina scanning protocol	101867-07	Background correction, normalization and transformation was performed with the 'rsn' function of the lumi package v2.12.0	GPL10558	Theodorus,Huibertus,van Essen	t.h.van_essen@lumc.nl	Leiden University Medical Center	Albinusdreef 2	Leiden	2333ZA	Netherlands	NONE	34625	50	Monosomy 3	death due to other cause	126	90	70	15
GSM2254883	UM_07	GSM2254883	Public on Aug 07 2016	Jul 29 2016	Aug 07 2016	RNA	1	tissue sample of uveal melanoma of enucleated eye	Homo sapiens	age at enucleation (years): 72	death due to metastasis: alive	chromosome 3 status: Disomy 3	follow-up (months): 121	hc10 (hla-b/c)-positive (percentage): 10	hca2 (hla-a)-positive (percentage): 30	tal.1b5 (hla-dr)-positive (percentage): 15	total RNA	RNA was extracted with Ambion RNAqueous isolation kit, followed by DNase I treatment and clean-up with QIAGEN RNeasy mini kit in accordance with the prescribed protocol provided with the kit. Quality control was performed with Agilent Bioanalyser	biotin	Biotinylated cRNA were prepared with the Ambion TotalPrep RNA Amp kit for Illumina arrays	9606	Standard Illumina hybridization protocol	Standard Illumina scanning protocol	101867-09	Background correction, normalization and transformation was performed with the 'rsn' function of the lumi package v2.12.0	GPL10558	Theodorus,Huibertus,van Essen	t.h.van_essen@lumc.nl	Leiden University Medical Center	Albinusdreef 2	Leiden	2333ZA	Netherlands	NONE	34625	72	Disomy 3	alive	121	10	30	15
GSM2254884	UM_08	GSM2254884	Public on Aug 07 2016	Jul 29 2016	Aug 07 2016	RNA	1	tissue sample of uveal melanoma of enucleated eye	Homo sapiens	age at enucleation (years): 81	death due to metastasis: alive	chromosome 3 status: Disomy 3	follow-up (months): 111	hc10 (hla-b/c)-positive (percentage): 5	hca2 (hla-a)-positive (percentage): 30	tal.1b5 (hla-dr)-positive (percentage): 25	total RNA	RNA was extracted with Ambion RNAqueous isolation kit, followed by DNase I treatment and clean-up with QIAGEN RNeasy mini kit in accordance with the prescribed protocol provided with the kit. Quality control was performed with Agilent Bioanalyser	biotin	Biotinylated cRNA were prepared with the Ambion TotalPrep RNA Amp kit for Illumina arrays	9606	Standard Illumina hybridization protocol	Standard Illumina scanning protocol	101867-10	Background correction, normalization and transformation was performed with the 'rsn' function of the lumi package v2.12.0	GPL10558	Theodorus,Huibertus,van Essen	t.h.van_essen@lumc.nl	Leiden University Medical Center	Albinusdreef 2	Leiden	2333ZA	Netherlands	NONE	34625	81	Disomy 3	alive	111	5	30	25
GSM2254885	UM_09	GSM2254885	Public on Aug 07 2016	Jul 29 2016	Aug 07 2016	RNA	1	tissue sample of uveal melanoma of enucleated eye	Homo sapiens	age at enucleation (years): 56	death due to metastasis: alive	chromosome 3 status: Disomy 3	follow-up (months): 114	hc10 (hla-b/c)-positive (percentage): 70	hca2 (hla-a)-positive (percentage): 50	tal.1b5 (hla-dr)-positive (percentage): 100	total RNA	RNA was extracted with Ambion RNAqueous isolation kit, followed by DNase I treatment and clean-up with QIAGEN RNeasy mini kit in accordance with the prescribed protocol provided with the kit. Quality control was performed with Agilent Bioanalyser	biotin	Biotinylated cRNA were prepared with the Ambion TotalPrep RNA Amp kit for Illumina arrays	9606	Standard Illumina hybridization protocol	Standard Illumina scanning protocol	101867-12	Background correction, normalization and transformation was performed with the 'rsn' function of the lumi package v2.12.0	GPL10558	Theodorus,Huibertus,van Essen	t.h.van_essen@lumc.nl	Leiden University Medical Center	Albinusdreef 2	Leiden	2333ZA	Netherlands	NONE	34625	56	Disomy 3	alive	114	70	50	100
GSM2254886	UM_10	GSM2254886	Public on Aug 07 2016	Jul 29 2016	Aug 07 2016	RNA	1	tissue sample of uveal melanoma of enucleated eye	Homo sapiens	age at enucleation (years): 54	death due to metastasis: alive	chromosome 3 status: Monosomy 3	follow-up (months): 112	hc10 (hla-b/c)-positive (percentage): 5	hca2 (hla-a)-positive (percentage): 60	tal.1b5 (hla-dr)-positive (percentage): 10	total RNA	RNA was extracted with Ambion RNAqueous isolation kit, followed by DNase I treatment and clean-up with QIAGEN RNeasy mini kit in accordance with the prescribed protocol provided with the kit. Quality control was performed with Agilent Bioanalyser	biotin	Biotinylated cRNA were prepared with the Ambion TotalPrep RNA Amp kit for Illumina arrays	9606	Standard Illumina hybridization protocol	Standard Illumina scanning protocol	101867-13	Background correction, normalization and transformation was performed with the 'rsn' function of the lumi package v2.12.0	GPL10558	Theodorus,Huibertus,van Essen	t.h.van_essen@lumc.nl	Leiden University Medical Center	Albinusdreef 2	Leiden	2333ZA	Netherlands	NONE	34625	54	Monosomy 3	alive	112	5	60	10
GSM2254887	UM_11	GSM2254887	Public on Aug 07 2016	Jul 29 2016	Aug 07 2016	RNA	1	tissue sample of uveal melanoma of enucleated eye	Homo sapiens	age at enucleation (years): 74	death due to metastasis: alive	chromosome 3 status: Disomy 3	follow-up (months): 113	hc10 (hla-b/c)-positive (percentage): 10	hca2 (hla-a)-positive (percentage): 20	tal.1b5 (hla-dr)-positive (percentage): 15	total RNA	RNA was extracted with Ambion RNAqueous isolation kit, followed by DNase I treatment and clean-up with QIAGEN RNeasy mini kit in accordance with the prescribed protocol provided with the kit. Quality control was performed with Agilent Bioanalyser	biotin	Biotinylated cRNA were prepared with the Ambion TotalPrep RNA Amp kit for Illumina arrays	9606	Standard Illumina hybridization protocol	Standard Illumina scanning protocol	101867-14	Background correction, normalization and transformation was performed with the 'rsn' function of the lumi package v2.12.0	GPL10558	Theodorus,Huibertus,van Essen	t.h.van_essen@lumc.nl	Leiden University Medical Center	Albinusdreef 2	Leiden	2333ZA	Netherlands	NONE	34625	74	Disomy 3	alive	113	10	20	15
GSM2254888	UM_12	GSM2254888	Public on Aug 07 2016	Jul 29 2016	Aug 07 2016	RNA	1	tissue sample of uveal melanoma of enucleated eye	Homo sapiens	age at enucleation (years): 54	death due to metastasis: death due to metas	chromosome 3 status: Monosomy 3	follow-up (months): 61	hc10 (hla-b/c)-positive (percentage): 70	hca2 (hla-a)-positive (percentage): 80	tal.1b5 (hla-dr)-positive (percentage): 15	total RNA	RNA was extracted with Ambion RNAqueous isolation kit, followed by DNase I treatment and clean-up with QIAGEN RNeasy mini kit in accordance with the prescribed protocol provided with the kit. Quality control was performed with Agilent Bioanalyser	biotin	Biotinylated cRNA were prepared with the Ambion TotalPrep RNA Amp kit for Illumina arrays	9606	Standard Illumina hybridization protocol	Standard Illumina scanning protocol	101867-15	Background correction, normalization and transformation was performed with the 'rsn' function of the lumi package v2.12.0	GPL10558	Theodorus,Huibertus,van Essen	t.h.van_essen@lumc.nl	Leiden University Medical Center	Albinusdreef 2	Leiden	2333ZA	Netherlands	NONE	34625	54	Monosomy 3	death due to metas	61	70	80	15
GSM2254889	UM_13	GSM2254889	Public on Aug 07 2016	Jul 29 2016	Aug 07 2016	RNA	1	tissue sample of uveal melanoma of enucleated eye	Homo sapiens	age at enucleation (years): 71	death due to metastasis: death due to metas	chromosome 3 status: Disomy 3	follow-up (months): 36	hc10 (hla-b/c)-positive (percentage): 5	hca2 (hla-a)-positive (percentage): 5	tal.1b5 (hla-dr)-positive (percentage): 10	total RNA	RNA was extracted with Ambion RNAqueous isolation kit, followed by DNase I treatment and clean-up with QIAGEN RNeasy mini kit in accordance with the prescribed protocol provided with the kit. Quality control was performed with Agilent Bioanalyser	biotin	Biotinylated cRNA were prepared with the Ambion TotalPrep RNA Amp kit for Illumina arrays	9606	Standard Illumina hybridization protocol	Standard Illumina scanning protocol	101867-16	Background correction, normalization and transformation was performed with the 'rsn' function of the lumi package v2.12.0	GPL10558	Theodorus,Huibertus,van Essen	t.h.van_essen@lumc.nl	Leiden University Medical Center	Albinusdreef 2	Leiden	2333ZA	Netherlands	NONE	34625	71	Disomy 3	death due to metas	36	5	5	10
GSM2254890	UM_14	GSM2254890	Public on Aug 07 2016	Jul 29 2016	Aug 07 2016	RNA	1	tissue sample of uveal melanoma of enucleated eye	Homo sapiens	age at enucleation (years): 34	death due to metastasis: alive	chromosome 3 status: Disomy 3	follow-up (months): 101	hc10 (hla-b/c)-positive (percentage): 50	hca2 (hla-a)-positive (percentage): 60	tal.1b5 (hla-dr)-positive (percentage): 25	total RNA	RNA was extracted with Ambion RNAqueous isolation kit, followed by DNase I treatment and clean-up with QIAGEN RNeasy mini kit in accordance with the prescribed protocol provided with the kit. Quality control was performed with Agilent Bioanalyser	biotin	Biotinylated cRNA were prepared with the Ambion TotalPrep RNA Amp kit for Illumina arrays	9606	Standard Illumina hybridization protocol	Standard Illumina scanning protocol	101867-17	Background correction, normalization and transformation was performed with the 'rsn' function of the lumi package v2.12.0	GPL10558	Theodorus,Huibertus,van Essen	t.h.van_essen@lumc.nl	Leiden University Medical Center	Albinusdreef 2	Leiden	2333ZA	Netherlands	NONE	34625	34	Disomy 3	alive	101	50	60	25
GSM2254891	UM_15	GSM2254891	Public on Aug 07 2016	Jul 29 2016	Aug 07 2016	RNA	1	tissue sample of uveal melanoma of enucleated eye	Homo sapiens	age at enucleation (years): 52	death due to metastasis: alive	chromosome 3 status: Disomy 3	follow-up (months): 97	hc10 (hla-b/c)-positive (percentage): 10	hca2 (hla-a)-positive (percentage): 20	tal.1b5 (hla-dr)-positive (percentage): 5	total RNA	RNA was extracted with Ambion RNAqueous isolation kit, followed by DNase I treatment and clean-up with QIAGEN RNeasy mini kit in accordance with the prescribed protocol provided with the kit. Quality control was performed with Agilent Bioanalyser	biotin	Biotinylated cRNA were prepared with the Ambion TotalPrep RNA Amp kit for Illumina arrays	9606	Standard Illumina hybridization protocol	Standard Illumina scanning protocol	101867-18	Background correction, normalization and transformation was performed with the 'rsn' function of the lumi package v2.12.0	GPL10558	Theodorus,Huibertus,van Essen	t.h.van_essen@lumc.nl	Leiden University Medical Center	Albinusdreef 2	Leiden	2333ZA	Netherlands	NONE	34625	52	Disomy 3	alive	97	10	20	5
GSM2254892	UM_16	GSM2254892	Public on Aug 07 2016	Jul 29 2016	Aug 07 2016	RNA	1	tissue sample of uveal melanoma of enucleated eye	Homo sapiens	age at enucleation (years): 75	death due to metastasis: death due to metas	chromosome 3 status: Monosomy 3	follow-up (months): 22	hc10 (hla-b/c)-positive (percentage): 40	hca2 (hla-a)-positive (percentage): 50	tal.1b5 (hla-dr)-positive (percentage): 10	total RNA	RNA was extracted with Ambion RNAqueous isolation kit, followed by DNase I treatment and clean-up with QIAGEN RNeasy mini kit in accordance with the prescribed protocol provided with the kit. Quality control was performed with Agilent Bioanalyser	biotin	Biotinylated cRNA were prepared with the Ambion TotalPrep RNA Amp kit for Illumina arrays	9606	Standard Illumina hybridization protocol	Standard Illumina scanning protocol	101867-19	Background correction, normalization and transformation was performed with the 'rsn' function of the lumi package v2.12.0	GPL10558	Theodorus,Huibertus,van Essen	t.h.van_essen@lumc.nl	Leiden University Medical Center	Albinusdreef 2	Leiden	2333ZA	Netherlands	NONE	34625	75	Monosomy 3	death due to metas	22	40	50	10
GSM2254893	UM_17	GSM2254893	Public on Aug 07 2016	Jul 29 2016	Aug 07 2016	RNA	1	tissue sample of uveal melanoma of enucleated eye	Homo sapiens	age at enucleation (years): 28	death due to metastasis: death due to metas	chromosome 3 status: Monosomy 3	follow-up (months): 96	hc10 (hla-b/c)-positive (percentage): 60	hca2 (hla-a)-positive (percentage): 90	tal.1b5 (hla-dr)-positive (percentage): 10	total RNA	RNA was extracted with Ambion RNAqueous isolation kit, followed by DNase I treatment and clean-up with QIAGEN RNeasy mini kit in accordance with the prescribed protocol provided with the kit. Quality control was performed with Agilent Bioanalyser	biotin	Biotinylated cRNA were prepared with the Ambion TotalPrep RNA Amp kit for Illumina arrays	9606	Standard Illumina hybridization protocol	Standard Illumina scanning protocol	101867-20	Background correction, normalization and transformation was performed with the 'rsn' function of the lumi package v2.12.0	GPL10558	Theodorus,Huibertus,van Essen	t.h.van_essen@lumc.nl	Leiden University Medical Center	Albinusdreef 2	Leiden	2333ZA	Netherlands	NONE	34625	28	Monosomy 3	death due to metas	96	60	90	10
GSM2254894	UM_18	GSM2254894	Public on Aug 07 2016	Jul 29 2016	Aug 07 2016	RNA	1	tissue sample of uveal melanoma of enucleated eye	Homo sapiens	age at enucleation (years): 48	death due to metastasis: death due to metas	chromosome 3 status: Monosomy 3	follow-up (months): 14	hc10 (hla-b/c)-positive (percentage): 25	hca2 (hla-a)-positive (percentage): 25	tal.1b5 (hla-dr)-positive (percentage): 5	total RNA	RNA was extracted with Ambion RNAqueous isolation kit, followed by DNase I treatment and clean-up with QIAGEN RNeasy mini kit in accordance with the prescribed protocol provided with the kit. Quality control was performed with Agilent Bioanalyser	biotin	Biotinylated cRNA were prepared with the Ambion TotalPrep RNA Amp kit for Illumina arrays	9606	Standard Illumina hybridization protocol	Standard Illumina scanning protocol	101867-21	Background correction, normalization and transformation was performed with the 'rsn' function of the lumi package v2.12.0	GPL10558	Theodorus,Huibertus,van Essen	t.h.van_essen@lumc.nl	Leiden University Medical Center	Albinusdreef 2	Leiden	2333ZA	Netherlands	NONE	34625	48	Monosomy 3	death due to metas	14	25	25	5
GSM2254895	UM_19	GSM2254895	Public on Aug 07 2016	Jul 29 2016	Aug 07 2016	RNA	1	tissue sample of uveal melanoma of enucleated eye	Homo sapiens	age at enucleation (years): 58	death due to metastasis: alive	chromosome 3 status: Disomy 3	follow-up (months): 147	hc10 (hla-b/c)-positive (percentage): 0	hca2 (hla-a)-positive (percentage): 10	tal.1b5 (hla-dr)-positive (percentage): 5	total RNA	RNA was extracted with Ambion RNAqueous isolation kit, followed by DNase I treatment and clean-up with QIAGEN RNeasy mini kit in accordance with the prescribed protocol provided with the kit. Quality control was performed with Agilent Bioanalyser	biotin	Biotinylated cRNA were prepared with the Ambion TotalPrep RNA Amp kit for Illumina arrays	9606	Standard Illumina hybridization protocol	Standard Illumina scanning protocol	101867-22	Background correction, normalization and transformation was performed with the 'rsn' function of the lumi package v2.12.0	GPL10558	Theodorus,Huibertus,van Essen	t.h.van_essen@lumc.nl	Leiden University Medical Center	Albinusdreef 2	Leiden	2333ZA	Netherlands	NONE	34625	58	Disomy 3	alive	147	0	10	5
GSM2254896	UM_20	GSM2254896	Public on Aug 07 2016	Jul 29 2016	Aug 07 2016	RNA	1	tissue sample of uveal melanoma of enucleated eye	Homo sapiens	age at enucleation (years): 71	death due to metastasis: death due to metas	chromosome 3 status: Monosomy 3	follow-up (months): 28	hc10 (hla-b/c)-positive (percentage): 40	hca2 (hla-a)-positive (percentage): 50	tal.1b5 (hla-dr)-positive (percentage): 50	total RNA	RNA was extracted with Ambion RNAqueous isolation kit, followed by DNase I treatment and clean-up with QIAGEN RNeasy mini kit in accordance with the prescribed protocol provided with the kit. Quality control was performed with Agilent Bioanalyser	biotin	Biotinylated cRNA were prepared with the Ambion TotalPrep RNA Amp kit for Illumina arrays	9606	Standard Illumina hybridization protocol	Standard Illumina scanning protocol	101867-23	Background correction, normalization and transformation was performed with the 'rsn' function of the lumi package v2.12.0	GPL10558	Theodorus,Huibertus,van Essen	t.h.van_essen@lumc.nl	Leiden University Medical Center	Albinusdreef 2	Leiden	2333ZA	Netherlands	NONE	34625	71	Monosomy 3	death due to metas	28	40	50	50
GSM2254897	UM_21	GSM2254897	Public on Aug 07 2016	Jul 29 2016	Aug 07 2016	RNA	1	tissue sample of uveal melanoma of enucleated eye	Homo sapiens	age at enucleation (years): 68	death due to metastasis: death due to metas	chromosome 3 status: Monosomy 3	follow-up (months): 36	hc10 (hla-b/c)-positive (percentage): 5	hca2 (hla-a)-positive (percentage): 40	tal.1b5 (hla-dr)-positive (percentage): 80	total RNA	RNA was extracted with Ambion RNAqueous isolation kit, followed by DNase I treatment and clean-up with QIAGEN RNeasy mini kit in accordance with the prescribed protocol provided with the kit. Quality control was performed with Agilent Bioanalyser	biotin	Biotinylated cRNA were prepared with the Ambion TotalPrep RNA Amp kit for Illumina arrays	9606	Standard Illumina hybridization protocol	Standard Illumina scanning protocol	101867-24	Background correction, normalization and transformation was performed with the 'rsn' function of the lumi package v2.12.0	GPL10558	Theodorus,Huibertus,van Essen	t.h.van_essen@lumc.nl	Leiden University Medical Center	Albinusdreef 2	Leiden	2333ZA	Netherlands	NONE	34625	68	Monosomy 3	death due to metas	36	5	40	80
GSM2254898	UM_22	GSM2254898	Public on Aug 07 2016	Jul 29 2016	Aug 07 2016	RNA	1	tissue sample of uveal melanoma of enucleated eye	Homo sapiens	age at enucleation (years): 72	death due to metastasis: death due to metas	chromosome 3 status: Monosomy 3	follow-up (months): 30	hc10 (hla-b/c)-positive (percentage): 10	hca2 (hla-a)-positive (percentage): 25	tal.1b5 (hla-dr)-positive (percentage): 35	total RNA	RNA was extracted with Ambion RNAqueous isolation kit, followed by DNase I treatment and clean-up with QIAGEN RNeasy mini kit in accordance with the prescribed protocol provided with the kit. Quality control was performed with Agilent Bioanalyser	biotin	Biotinylated cRNA were prepared with the Ambion TotalPrep RNA Amp kit for Illumina arrays	9606	Standard Illumina hybridization protocol	Standard Illumina scanning protocol	101867-25	Background correction, normalization and transformation was performed with the 'rsn' function of the lumi package v2.12.0	GPL10558	Theodorus,Huibertus,van Essen	t.h.van_essen@lumc.nl	Leiden University Medical Center	Albinusdreef 2	Leiden	2333ZA	Netherlands	NONE	34625	72	Monosomy 3	death due to metas	30	10	25	35
GSM2254899	UM_23	GSM2254899	Public on Aug 07 2016	Jul 29 2016	Aug 07 2016	RNA	1	tissue sample of uveal melanoma of enucleated eye	Homo sapiens	age at enucleation (years): 46	death due to metastasis: alive	chromosome 3 status: Disomy 3	follow-up (months): 156	hc10 (hla-b/c)-positive (percentage): 0	hca2 (hla-a)-positive (percentage): 5	tal.1b5 (hla-dr)-positive (percentage): 10	total RNA	RNA was extracted with Ambion RNAqueous isolation kit, followed by DNase I treatment and clean-up with QIAGEN RNeasy mini kit in accordance with the prescribed protocol provided with the kit. Quality control was performed with Agilent Bioanalyser	biotin	Biotinylated cRNA were prepared with the Ambion TotalPrep RNA Amp kit for Illumina arrays	9606	Standard Illumina hybridization protocol	Standard Illumina scanning protocol	101867-27	Background correction, normalization and transformation was performed with the 'rsn' function of the lumi package v2.12.0	GPL10558	Theodorus,Huibertus,van Essen	t.h.van_essen@lumc.nl	Leiden University Medical Center	Albinusdreef 2	Leiden	2333ZA	Netherlands	NONE	34625	46	Disomy 3	alive	156	0	5	10
GSM2254900	UM_24	GSM2254900	Public on Aug 07 2016	Jul 29 2016	Aug 07 2016	RNA	1	tissue sample of uveal melanoma of enucleated eye	Homo sapiens	age at enucleation (years): 73	death due to metastasis: death due to metas	chromosome 3 status: Monosomy 3	follow-up (months): 47	hc10 (hla-b/c)-positive (percentage): 80	hca2 (hla-a)-positive (percentage): 95	tal.1b5 (hla-dr)-positive (percentage): 30	total RNA	RNA was extracted with Ambion RNAqueous isolation kit, followed by DNase I treatment and clean-up with QIAGEN RNeasy mini kit in accordance with the prescribed protocol provided with the kit. Quality control was performed with Agilent Bioanalyser	biotin	Biotinylated cRNA were prepared with the Ambion TotalPrep RNA Amp kit for Illumina arrays	9606	Standard Illumina hybridization protocol	Standard Illumina scanning protocol	101867-28	Background correction, normalization and transformation was performed with the 'rsn' function of the lumi package v2.12.0	GPL10558	Theodorus,Huibertus,van Essen	t.h.van_essen@lumc.nl	Leiden University Medical Center	Albinusdreef 2	Leiden	2333ZA	Netherlands	NONE	34625	73	Monosomy 3	death due to metas	47	80	95	30
GSM2254901	UM_25	GSM2254901	Public on Aug 07 2016	Jul 29 2016	Aug 07 2016	RNA	1	tissue sample of uveal melanoma of enucleated eye	Homo sapiens	age at enucleation (years): 84	death due to metastasis: death due to metas	chromosome 3 status: Monosomy 3	follow-up (months): 14	hc10 (hla-b/c)-positive (percentage): 10	hca2 (hla-a)-positive (percentage): 5	tal.1b5 (hla-dr)-positive (percentage): 20	total RNA	RNA was extracted with Ambion RNAqueous isolation kit, followed by DNase I treatment and clean-up with QIAGEN RNeasy mini kit in accordance with the prescribed protocol provided with the kit. Quality control was performed with Agilent Bioanalyser	biotin	Biotinylated cRNA were prepared with the Ambion TotalPrep RNA Amp kit for Illumina arrays	9606	Standard Illumina hybridization protocol	Standard Illumina scanning protocol	101952-01	Background correction, normalization and transformation was performed with the 'rsn' function of the lumi package v2.12.0	GPL10558	Theodorus,Huibertus,van Essen	t.h.van_essen@lumc.nl	Leiden University Medical Center	Albinusdreef 2	Leiden	2333ZA	Netherlands	NONE	34625	84	Monosomy 3	death due to metas	14	10	5	20
GSM2254902	UM_26	GSM2254902	Public on Aug 07 2016	Jul 29 2016	Aug 07 2016	RNA	1	tissue sample of uveal melanoma of enucleated eye	Homo sapiens	age at enucleation (years): 73	death due to metastasis: death due to other cause	chromosome 3 status: Disomy 3	follow-up (months): 63	hc10 (hla-b/c)-positive (percentage): 100	hca2 (hla-a)-positive (percentage): 80	tal.1b5 (hla-dr)-positive (percentage): 30	total RNA	RNA was extracted with Ambion RNAqueous isolation kit, followed by DNase I treatment and clean-up with QIAGEN RNeasy mini kit in accordance with the prescribed protocol provided with the kit. Quality control was performed with Agilent Bioanalyser	biotin	Biotinylated cRNA were prepared with the Ambion TotalPrep RNA Amp kit for Illumina arrays	9606	Standard Illumina hybridization protocol	Standard Illumina scanning protocol	101952-02	Background correction, normalization and transformation was performed with the 'rsn' function of the lumi package v2.12.0	GPL10558	Theodorus,Huibertus,van Essen	t.h.van_essen@lumc.nl	Leiden University Medical Center	Albinusdreef 2	Leiden	2333ZA	Netherlands	NONE	34625	73	Disomy 3	death due to other cause	63	100	80	30
GSM2254903	UM_27	GSM2254903	Public on Aug 07 2016	Jul 29 2016	Aug 07 2016	RNA	1	tissue sample of uveal melanoma of enucleated eye	Homo sapiens	age at enucleation (years): 76	death due to metastasis: death due to metas	chromosome 3 status: Monosomy 3	follow-up (months): 53	hc10 (hla-b/c)-positive (percentage): 70	hca2 (hla-a)-positive (percentage): 20	tal.1b5 (hla-dr)-positive (percentage): 5	total RNA	RNA was extracted with Ambion RNAqueous isolation kit, followed by DNase I treatment and clean-up with QIAGEN RNeasy mini kit in accordance with the prescribed protocol provided with the kit. Quality control was performed with Agilent Bioanalyser	biotin	Biotinylated cRNA were prepared with the Ambion TotalPrep RNA Amp kit for Illumina arrays	9606	Standard Illumina hybridization protocol	Standard Illumina scanning protocol	101952-03	Background correction, normalization and transformation was performed with the 'rsn' function of the lumi package v2.12.0	GPL10558	Theodorus,Huibertus,van Essen	t.h.van_essen@lumc.nl	Leiden University Medical Center	Albinusdreef 2	Leiden	2333ZA	Netherlands	NONE	34625	76	Monosomy 3	death due to metas	53	70	20	5
GSM2254904	UM_28	GSM2254904	Public on Aug 07 2016	Jul 29 2016	Aug 07 2016	RNA	1	tissue sample of uveal melanoma of enucleated eye	Homo sapiens	age at enucleation (years): 65	death due to metastasis: alive	chromosome 3 status: Disomy 3	follow-up (months): 112	hc10 (hla-b/c)-positive (percentage): 0	hca2 (hla-a)-positive (percentage): 5	tal.1b5 (hla-dr)-positive (percentage): 5	total RNA	RNA was extracted with Ambion RNAqueous isolation kit, followed by DNase I treatment and clean-up with QIAGEN RNeasy mini kit in accordance with the prescribed protocol provided with the kit. Quality control was performed with Agilent Bioanalyser	biotin	Biotinylated cRNA were prepared with the Ambion TotalPrep RNA Amp kit for Illumina arrays	9606	Standard Illumina hybridization protocol	Standard Illumina scanning protocol	101952-04	Background correction, normalization and transformation was performed with the 'rsn' function of the lumi package v2.12.0	GPL10558	Theodorus,Huibertus,van Essen	t.h.van_essen@lumc.nl	Leiden University Medical Center	Albinusdreef 2	Leiden	2333ZA	Netherlands	NONE	34625	65	Disomy 3	alive	112	0	5	5

## Sheet: S10
phenodata of TCGA-UVM
sample	Age	Extrascleral_extension	M_stage	T_stage	tumor_infiltrating_lymphocytes	tumor_infiltrating_macrophages	Shape	Gender	Status	Stage	sample	risk
TCGA.VD.AA8P.01A	>= 60	No	M0	T2-T3	Few		Dome	Female	Alive	II	TCGA.VD.AA8P.01A	High
TCGA.VD.AA8T.01A	>= 60	No	M0	T2-T3	Few	Few	Dome	Female	Alive	II	TCGA.VD.AA8T.01A	High
TCGA.VD.AA8M.01A	>= 60	No	M0	T2-T3	Few	Few	Dome	Male	Alive	II	TCGA.VD.AA8M.01A	High
TCGA.VD.AA8N.01A	>= 60	No	M0	T2-T3	Few	Few	Dome	Male	Alive	II	TCGA.VD.AA8N.01A	High
TCGA.V4.A9F1.01A	< 60	No	M0	T2-T3				Female	Alive	II	TCGA.V4.A9F1.01A	High
TCGA.WC.A882.01A	< 60	No	M0	T2-T3				Female	Alive	II	TCGA.WC.A882.01A	High
TCGA.VD.A8KM.01A	>= 60	No		T2-T3	Few	Few	Dome	Male	Alive	II	TCGA.VD.A8KM.01A	High
TCGA.V3.A9ZX.01A	< 60			T2-T3	Many	Few		Male	Alive	II	TCGA.V3.A9ZX.01A	High
TCGA.V4.A9EE.01A	>= 60	No	M0	T2-T3			Dome	Male	Dead	II	TCGA.V4.A9EE.01A	High
TCGA.VD.AA8O.01A	>= 60	No	M0	T2-T3	Moderate Numbers	Few	Dome	Male	Dead	II	TCGA.VD.AA8O.01A	High
TCGA.VD.AA8Q.01A	>= 60	No	M0	T2-T3	Few	Few	Dome	Male	Dead	II	TCGA.VD.AA8Q.01A	High
TCGA.WC.A888.01A	>= 60	No	M0	T2-T3			Dome	Male	Dead	II	TCGA.WC.A888.01A	High
TCGA.VD.A8K8.01A	< 60	No		T2-T3	Few	Few	Dome	Female	Dead	II	TCGA.VD.A8K8.01A	High
TCGA.VD.A8KI.01A	>= 60	No		T2-T3	Few	Few	Dome	Male	Dead	II	TCGA.VD.A8KI.01A	High
TCGA.YZ.A984.01A	< 60	No		T2-T3				Female	Dead	II	TCGA.YZ.A984.01A	High
TCGA.WC.AA9A.01A	>= 60	No		T2-T3				Female	Dead	II	TCGA.WC.AA9A.01A	High
TCGA.V4.A9EK.01A	< 60	No	M0	T2-T3			Dome	Female	Alive	II	TCGA.V4.A9EK.01A	Low
TCGA.WC.A87W.01A	< 60	No	M0	T2-T3			Dome	Female	Alive	II	TCGA.WC.A87W.01A	Low
TCGA.V4.A9EZ.01A	>= 60	No	M0	T2-T3			Dome	Female	Alive	II	TCGA.V4.A9EZ.01A	Low
TCGA.VD.AA8R.01A	>= 60	No	M0	T2-T3	Few	Few	Dome	Female	Alive	II	TCGA.VD.AA8R.01A	Low
TCGA.V4.A9EJ.01A	< 60	No	M0	T2-T3			Dome	Male	Alive	II	TCGA.V4.A9EJ.01A	Low
TCGA.VD.AA8S.01B	< 60	No	M0	T2-T3	Few	Few	Dome	Male	Alive	II	TCGA.VD.AA8S.01B	Low
TCGA.WC.A881.01A	>= 60	No	M0	T2-T3			Dome	Male	Alive	II	TCGA.WC.A881.01A	Low
TCGA.WC.A885.01A	>= 60	No	M0	T2-T3			Dome	Male	Alive	II	TCGA.WC.A885.01A	Low
TCGA.V4.A9EC.01A	>= 60	No	M0	T2-T3			Mushroom	Female	Alive	II	TCGA.V4.A9EC.01A	Low
TCGA.V4.A9F7.01A	>= 60	No	M0	T2-T3			Mushroom	Female	Alive	II	TCGA.V4.A9F7.01A	Low
TCGA.WC.A87T.01A	>= 60	No	M0	T2-T3			Mushroom	Male	Alive	II	TCGA.WC.A87T.01A	Low
TCGA.VD.A8KG.01A	< 60	No		T2-T3	Few		Dome	Female	Alive	II	TCGA.VD.A8KG.01A	Low
TCGA.VD.A8K9.01A	>= 60	No		T2-T3	Few	Few	Dome	Female	Alive	II	TCGA.VD.A8K9.01A	Low
TCGA.VD.A8KL.01A	>= 60	No		T2-T3	Few		Dome	Female	Alive	II	TCGA.VD.A8KL.01A	Low
TCGA.VD.A8KN.01A	>= 60	No		T2-T3	Few	Few	Dome	Female	Alive	II	TCGA.VD.A8KN.01A	Low
TCGA.VD.A8KJ.01A	< 60	No		T2-T3	Few	Few	Dome	Male	Alive	II	TCGA.VD.A8KJ.01A	Low
TCGA.VD.A8KO.01A	< 60	No		T2-T3	Few		Dome	Male	Alive	II	TCGA.VD.A8KO.01A	Low
TCGA.VD.A8KE.01A	>= 60	No		T2-T3	Few		Mushroom	Female	Alive	II	TCGA.VD.A8KE.01A	Low
TCGA.YZ.A983.01A	< 60	No		T2-T3	Few			Female	Alive	II	TCGA.YZ.A983.01A	Low
TCGA.VD.A8KB.01A	>= 60	No		T2-T3	Few			Female	Alive	II	TCGA.VD.A8KB.01A	Low
TCGA.VD.A8KA.01B	< 60	No		T2-T3	Few			Male	Alive	II	TCGA.VD.A8KA.01B	Low
TCGA.WC.AA9E.01A	>= 60	No		T2-T3				Male	Alive	II	TCGA.WC.AA9E.01A	Low
TCGA.V3.A9ZY.01A	< 60			T2-T3				Male	Alive	II	TCGA.V3.A9ZY.01A	Low
TCGA.V4.A9ES.01A	< 60	No	M0	T2-T3				Female	Alive	III-IV	TCGA.V4.A9ES.01A	High
TCGA.V4.A9EO.01A	>= 60	No	M0	T4			Mushroom	Male	Alive	III-IV	TCGA.V4.A9EO.01A	High
TCGA.V4.A9F8.01A	>= 60	No	M0	T4	Many		Mushroom	Male	Alive	III-IV	TCGA.V4.A9F8.01A	High
TCGA.V4.A9EL.01A	>= 60	No	M0	T4				Male	Alive	III-IV	TCGA.V4.A9EL.01A	High
TCGA.V4.A9EU.01A	>= 60	Yes	M0	T4				Female	Alive	III-IV	TCGA.V4.A9EU.01A	High
TCGA.V4.A9F5.01A	>= 60	Yes	M1	T4				Female	Alive	III-IV	TCGA.V4.A9F5.01A	High
TCGA.YZ.A980.01A	>= 60	No		T2-T3				Male	Alive	III-IV	TCGA.YZ.A980.01A	High
TCGA.VD.A8KK.01A	< 60	No		T4	Few	Few	Dome	Male	Alive	III-IV	TCGA.VD.A8KK.01A	High
TCGA.VD.A8KH.01A	>= 60	No		T4	Few		Mushroom	Male	Alive	III-IV	TCGA.VD.A8KH.01A	High
TCGA.WC.A883.01A	>= 60	Yes	M0	T2-T3			Diffuse	Female	Dead	III-IV	TCGA.WC.A883.01A	High
TCGA.WC.A87U.01A	>= 60	No	M0	T2-T3			Dome	Male	Dead	III-IV	TCGA.WC.A87U.01A	High
TCGA.V4.A9F3.01A	< 60	No	M0	T4			Dome	Female	Dead	III-IV	TCGA.V4.A9F3.01A	High
TCGA.V4.A9E8.01A	< 60	No	M0	T4			Dome	Male	Dead	III-IV	TCGA.V4.A9E8.01A	High
TCGA.V4.A9F0.01A	< 60	No	M0	T4			Dome	Male	Dead	III-IV	TCGA.V4.A9F0.01A	High
TCGA.V4.A9EQ.01A	>= 60	No	M0	T4			Dome	Male	Dead	III-IV	TCGA.V4.A9EQ.01A	High
TCGA.V4.A9EX.01A	< 60	No	M0	T4			Mushroom	Female	Dead	III-IV	TCGA.V4.A9EX.01A	High
TCGA.V4.A9EI.01A	>= 60	Yes	M0	T4			Mushroom	Male	Dead	III-IV	TCGA.V4.A9EI.01A	High
TCGA.V4.A9EV.01A	< 60	No	M0	T4				Female	Dead	III-IV	TCGA.V4.A9EV.01A	High
TCGA.V4.A9E7.01A	>= 60		M0	T4				Male	Dead	III-IV	TCGA.V4.A9E7.01A	High
TCGA.VD.A8KD.01A	>= 60	No	M1	T4	Moderate Numbers	Few	Mushroom	Male	Dead	III-IV	TCGA.VD.A8KD.01A	High
TCGA.WC.A88A.01A	>= 60	Yes	M1	T4				Male	Dead	III-IV	TCGA.WC.A88A.01A	High
TCGA.RZ.AB0B.01A	< 60		M1	T4				Female	Dead	III-IV	TCGA.RZ.AB0B.01A	High
TCGA.VD.A8KF.01A	>= 60	No		T4	Few		Diffuse	Male	Dead	III-IV	TCGA.VD.A8KF.01A	High
TCGA.V4.A9F2.01A	>= 60	No	M0	T2-T3			Dome	Female	Alive	III-IV	TCGA.V4.A9F2.01A	Low
TCGA.V4.A9ED.01A	< 60	No	M0	T2-T3				Male	Alive	III-IV	TCGA.V4.A9ED.01A	Low
TCGA.V4.A9F4.01A	< 60	No	M0	T4			Dome	Male	Alive	III-IV	TCGA.V4.A9F4.01A	Low
TCGA.WC.A880.01A	>= 60	No	M0	T4			Dome	Male	Alive	III-IV	TCGA.WC.A880.01A	Low
TCGA.V4.A9EF.01A	< 60	No	M0	T4			Mushroom	Male	Alive	III-IV	TCGA.V4.A9EF.01A	Low
TCGA.V4.A9EA.01A	>= 60	No	M0	T4			Mushroom	Male	Alive	III-IV	TCGA.V4.A9EA.01A	Low
TCGA.V4.A9EH.01A	< 60	Yes	M0	T4			Mushroom	Male	Alive	III-IV	TCGA.V4.A9EH.01A	Low
TCGA.V4.A9E5.01A	< 60	No	M0	T4				Female	Alive	III-IV	TCGA.V4.A9E5.01A	Low
TCGA.V4.A9EW.01A	< 60	No	M0	T4				Female	Alive	III-IV	TCGA.V4.A9EW.01A	Low
TCGA.WC.A884.01A	< 60	No	M0	T4				Female	Alive	III-IV	TCGA.WC.A884.01A	Low
TCGA.V4.A9EY.01A	>= 60	No	M0	T4				Female	Alive	III-IV	TCGA.V4.A9EY.01A	Low
TCGA.V4.A9E9.01A	< 60	No	M0	T4				Male	Alive	III-IV	TCGA.V4.A9E9.01A	Low
TCGA.V4.A9ET.01A	< 60	No	M0	T4				Male	Alive	III-IV	TCGA.V4.A9ET.01A	Low
TCGA.V4.A9EM.01A	< 60		M0	T4				Male	Alive	III-IV	TCGA.V4.A9EM.01A	Low
TCGA.VD.A8K7.01B	< 60	No		T4	Few	Few	Dome	Male	Alive	III-IV	TCGA.VD.A8K7.01B	Low
TCGA.YZ.A985.01A	< 60	No		T4				Female	Alive	III-IV	TCGA.YZ.A985.01A	Low
TCGA.YZ.A982.01A	>= 60	No		T4				Female	Alive	III-IV	TCGA.YZ.A982.01A	Low
TCGA.WC.A87Y.01A	< 60	Yes	M0	T2-T3			Dome	Male	Dead		TCGA.WC.A87Y.01A	High

## Sheet: S11
34 ICD-related genes
ENTPD1
NT5E
CALR
HMGB1
HSP90AA1
ATG5
BAX
CASP8
PDIA3
EIF2AK3
PIK3CA
CXCR3
IFNA1
IFNB1
IL10
IL6
TNF
CASP1
IL1R1
IL1B
NLRP3
P2RX7
LY96
MYD88
TLR4
CD4
CD8A
CD8B
FOXP3
IFNG
IFNGR1
IL17A
IL17RA
PRF1
